# Supplementary material for: Barriers and facilitators to adherence to secondary stroke prevention medications after stroke: analysis of survivors and caregivers views from an online stroke forum
Source: PubMed Central journal article supplement (PMC5541606; doi:10.1136/bmjopen-2017-016814), 2017-07-16
Supplement: bmjopen-2017-016814.draft_revisions.pdf [file bmjopen-2017-016814.draft_revisions.pdf]

# BMJ Open

## Barriers and facilitators to adherence to secondary stroke prevention medications after stroke: Analysis of survivors' and caregivers' views from an online stroke forum

|                                 |                                                                                                                                                                                                                                                                                                                               |
|---------------------------------|-------------------------------------------------------------------------------------------------------------------------------------------------------------------------------------------------------------------------------------------------------------------------------------------------------------------------------|
| Journal:                        | <i>BMJ Open</i>                                                                                                                                                                                                                                                                                                               |
| Manuscript ID                   | bmjopen-2017-016814                                                                                                                                                                                                                                                                                                           |
| Article Type:                   | Research                                                                                                                                                                                                                                                                                                                      |
| Date Submitted by the Author:   | 13-Mar-2017                                                                                                                                                                                                                                                                                                                   |
| Complete List of Authors:       | JAMISON, JAMES; UNIVERSITY OF CAMBRIDGE, Public Health and Primary Care<br>Sutton, Stephen; University of Cambridge, Public health and Primary Care<br>Mant, Jonathan; University of Cambridge, Public Health and Primary Care<br>De Simoni, Anna; Queen Mary University of London, Centre for Primary Care and Public Health |
| <b>Primary Subject Heading</b>: | Cardiovascular medicine                                                                                                                                                                                                                                                                                                       |
| Secondary Subject Heading:      | Qualitative research                                                                                                                                                                                                                                                                                                          |
| Keywords:                       | STROKE MEDICINE, Caregiver, Medication adherence, Online forum                                                                                                                                                                                                                                                                |
|                                 |                                                                                                                                                                                                                                                                                                                               |

SCHOLARONE™  
Manuscripts

1  
2  
3 **Barriers and facilitators to adherence to secondary stroke**  
4 **prevention medications after stroke: Analysis of survivors’**  
5  
6 **and caregivers’ views from an online stroke forum**  
7  
8  
9  
10  
11  
12  
13  
14

15 \*James Jamison<sup>1</sup>

16 Stephen Sutton<sup>1</sup>

17 Jonathan Mant<sup>1</sup>

18 Anna De Simoni<sup>2</sup>

19  
20  
21  
22  
23  
24  
25  
26  
27  
28  
29 <sup>1</sup>Primary Care Unit, Department of Public Health & Primary Care, Forvie Site, University of Cambridge  
30 School of Clinical Medicine, Box 113 Cambridge Biomedical Campus, Cambridge, CB2 0SR.

31  
32  
33 <sup>2</sup>Centre for Primary Care and Public Health, Barts and the London School of Medicine and Dentistry, Queen  
34 Mary University of London, London, E1 2AB

35  
36  
37  
38  
39 \*corresponding author: James Jamison; Tel: +44 (0)1223 768272. Fax: +44 (0)1223 763492. Email:

40 jj285@medschl.cam.ac.uk  
41  
42  
43  
44  
45  
46  
47  
48  
49  
50  
51  
52  
53  
54  
55  
56  
57  
58  
59  
60

**ABSTRACT**

## Objective

To identify barriers and facilitators of medication adherence in patients with stroke along with their caregivers.

## Design

Qualitative thematic analysis of posts about secondary prevention medications, informed by Perceptions and Practicalities Approach.

## Setting

Posts written by UK stroke survivors and their family members taking part in the online forum of the Stroke Association, between 2004 and 2011.

## Participants

84 participants: 49 stroke survivors, 33 caregivers, 2 not stated, identified using the keywords 'taking medication', 'pills', 'size', 'side-effects', 'routine', 'blister' as well as secondary prevention medication terms.

## Results

Perceptions reducing the motivation to adhere included dealing with medication side effects, questioning doctors' prescribing practices, and negative publicity about medications, especially in regard to statins.

Caregivers faced difficulties with ensuring medications were taken while respecting the patient's decisions not to take tablets. They struggled in their role as advocates of patient's needs with healthcare professionals. Not experiencing side effects, attributing importance to medications, positive personal experiences of taking tablets and obtaining modification of treatment to manage side effects were facilitators of adherence. Key practical barriers included difficulties with swallowing tablets, dealing with the burden of treatment and drug cost. Using medication storage devices, following routines and getting help with medications from caregivers were important facilitators of adherence.

## Conclusions

An online stroke forum is a novel and valuable resource to investigate use of secondary prevention medications. Analysis of this forum highlighted significant barriers and facilitators of medication adherence faced by stroke survivors and their caregivers. Addressing perceptual and practical barriers highlighted here

1  
2  
3 can inform the development of future interventions aimed at improving adherence to secondary prevention  
4 medication after stroke.

5  
6  
7 Abstract word count- 268

8  
9 Keywords: stroke, caregiver, medication adherence, online forum

## 10 11 12 13 Article summary

### 14 15 Strengths and Limitations

- 16  
17 • The first study to explore and identify perceived barriers and facilitators to medication adherence  
18 among users of an online stroke forum using a theoretical framework.
- 19  
20 • Inclusion of caregivers offers a unique perspective for understanding of medication taking behavior in  
21 patients with severe disabilities.
- 22  
23 • The online forum allowed patients and caregivers to communicate in a comfortable environment  
24 beyond the influence of the research team, shedding new light on factors affecting adherence to  
25 secondary prevention medications.
- 26  
27 • Key themes identified may be limited by the search terms used and may not provide an exhaustive list  
28 of all barriers and facilitators to adherence discussed in the forum.
- 29  
30 • Posts were scrutinized by a moderator prior to being published.
- 31  
32 • The online forum was dated 2004-2011 and might not reflect current practice.

33  
34  
35  
36  
37  
38  
39  
40  
41  
42 Funding: ADS is funded by a NIHR Academic Clinical Lectureship. The views expressed are those of the  
43 author(s) and not necessarily those of the NHS, the NIHR or the Department of Health. James Jamison was  
44 supported by a research grant from The Stroke Association and the British Heart Foundation: TSA  
45 BHF 2011/01

46  
47  
48  
49  
50  
51  
52  
53 Data sharing statement: No additional data available.

## INTRODUCTION

Stroke recurrences are associated with higher disability and mortality than first time strokes,<sup>1</sup> and account for one third of all stroke events.<sup>2</sup> Secondary prevention medicines are considered important in reducing stroke recurrences in patient who have already experienced a stroke or transient ischaemic attack.<sup>3,4</sup> However medication non-adherence is an issue known to be problematic, contributing to suboptimal health outcomes.<sup>5</sup> Reported practical barriers to medication adherence after stroke include forgetting medication, difficulty swallowing tablets and difficulties handling packaged medications.<sup>6</sup> A key factor decreasing patients' motivation for taking secondary prevention medications is having concerns about tablets, such as becoming dependent on them or worrying about their long term effects.<sup>7</sup> Difficulties with taking medication, lack of information on stroke and medications and patient's fears of medicines are important barriers, while support from caregivers and worrying about further stroke are facilitators.<sup>8</sup>

Severe stroke related impairments make it difficult for survivors to participate in research. Perhaps for this reason there is little evidence available on factors affecting adherence to medications in patients with more disabling strokes (at least a third of stroke survivors).<sup>9,10</sup> Studying factors affecting adherence can be difficult because of self-presentational bias, i.e. patients may perceive that a certain behaviour, e.g. adherence to treatment, is one of the duties expected of the 'good patient' and may be reluctant to admit a different behaviour<sup>11 12</sup>.

Caregivers of elderly patients experience difficulties with tablet administration.<sup>13</sup> As patients' dependency on caregivers for medicine taking increases, caregivers' factors also become relevant in determining patients' adherence.<sup>10</sup> Indeed, a recent interview study by the authors<sup>14</sup> highlighted the importance of caregivers in adherence to secondary prevention medications. Findings from another study suggest that among patients with cardiovascular disease, those with a caregiver were more likely to be adherent to medications.<sup>15</sup> There is need to investigate adherence to secondary prevention medications after stroke avoiding self-representation biases, including patients' with severe disabilities and caregivers' factors.<sup>10</sup> Online health forums are accessible 24/7 in the form of asynchronous communication that is convenient to the user. This medium offers anonymity and encourages honesty. Individuals with health-related difficulties can communicate in confidence about what

1  
2  
3 matters to them.<sup>11</sup> TalkStroke is an online forum where survivors and their families discuss information and  
4 provide support to one another. A recent study using this forum showed that a wide variety of themes were  
5 discussed online, including secondary prevention medications.<sup>16</sup> Caregiver views were well represented and  
6 most of them (70%) looked after patients with severe disabilities. Among forum users who were stroke  
7 survivors, 30% were suffering from severe impairments.<sup>16</sup> Therefore data from the archives of this forum  
8 have the potential to shed light on adherence issues for this hard to reach groups.<sup>17</sup>

9  
10  
11 The aim of this investigation was to understand barriers and facilitators of medication adherence among  
12 survivors of stroke and their caregivers' through evaluating posts written in an online stroke forum, using a  
13 framework based approach.  
14

## 15 16 17 18 19 20 21 22 23 24 25 **METHODS**

### 26 27 28 **Design**

29 We undertook a qualitative analysis of posts to the TalkStroke online forum using the PAPA (Perceptions And  
30 Practicalities Approach) theoretical framework.<sup>18</sup> According to the framework, nonadherence is viewed as a  
31 variable that can change over time and treatments. Nonadherence is known to be intentional or unintentional.  
32 Unintentional adherence is linked to practical factors and resource limitation while perceptual factors or  
33 beliefs affect intentional adherence, i.e. how patients consciously make decisions that influence their  
34 medication taking behaviour.<sup>19</sup> This framework posits that patients make a choice to take medication based  
35 upon judgement of their personal need for the medication, relative to their concerns about the possible  
36 consequences of taking it, as well as unintentional adherence.<sup>18</sup> The PAPA approach seeks to understand  
37 adherence through addressing both perceptual (beliefs and preferences) and practical (capability and  
38 resources) factors which have an influence on patients commencing and continuing treatment. We searched  
39 the forum archives using a set of pre-defined keywords, in order to identify barriers and facilitators of  
40 adherence to secondary prevention medications. Posts were written by stroke survivors or family  
41 members/caregivers.  
42  
43  
44  
45  
46  
47  
48  
49  
50  
51  
52  
53  
54  
55  
56  
57  
58  
59  
60

## Setting

The analysis was performed on the archives from TalkStroke, a UK based online forum hosted by the Stroke Association website, including 22,173 posts written between 2004 and 2011 by 2,583 unique usernames.<sup>16</sup> Talkstroke was an online resource through which stroke survivors and caregivers could seek and/or offer information and support.

## Procedure and participants

A word list of unique terms of the archive file of Talkstroke was generated using AntConc3.2.4.<sup>20</sup> Terms related to secondary prevention medications were selected (e.g. Amlodipine, statin, warfarin), including misspellings (e.g. Aspirin, simvastin), brand names (e.g. Lipitor, Plavix) and drug categories (e.g. statin, diuretics etc.). Posts including any secondary prevention medication term were identified. We additionally searched the Talkstroke archive for the keywords: 'taking medication', 'pills', 'size', 'statins', 'side effects', 'capsule', 'box', 'routine', 'blister', and 'secondary prevention'. Search terms were discussed and agreed by two authors (JJ and ADS, see online supplementary figure 1).

Participants of the online forum included stroke survivors and patients talked about by caregivers, identified by usernames linked to each of the selected posts. Characteristics were retrieved from usernames, taking advantage of data from a previous study.<sup>16</sup> Demographics are shown in table 1. All posts that were relevant for the research questions were copied and pasted into Microsoft Excel and NVivo 10 for later analysis.

## Ethics

The Stroke Association gave permission to ADS to use the data for research purposes. To protect the identity and intellectual property of forum participants,<sup>21</sup> we chose not to use *verbatim* quotes, despite this being normal practice in qualitative research. Instead, we used descriptions of quotes throughout the text.<sup>16 17</sup> The ethical aspects of conducting research on this forum have been discussed more extensively elsewhere.<sup>16</sup>

## Data Analysis

A qualitative approach using thematic analysis was undertaken to explore forum posts.<sup>22</sup> All posts retrieved through the search terms were read by JJ to aid familiarization. To strengthen the validity of findings and ensure rigour, 50% of all posts were double-coded by ADS. Queries arising from the coding process were resolved through discussions involving a third author (SS) where necessary, until a final consensus was reached. Nvivo 10 was used to manage and organise the data. A set of codes representing key themes were initially developed from the forum posts by JJ, to represent barriers and facilitators of medication adherence. These themes were refined, and sub-themes were identified and grouped together with similar concepts. A coding framework was formed and refined further as additional themes emerged. Data saturation was reached with the recruitment of 84 individuals, beyond which no new themes emerged. Guided by the PAPA framework, we coded forum posts to identify practical and perceptual factors affecting adherence to medications. Identified themes were mapped onto the theory and sub-divided into barriers or facilitators of adherence.

Although there is evidence that inappropriate medical information or health behaviours in this online stroke forum were identified and corrected by participants in subsequent postings,<sup>16</sup> consistent with what is reported elsewhere in a cancer patients' internet support group,<sup>23</sup> threads of discussions were not analysed here. Therefore self-correction received through the forum is not reported. For the purpose of this study, the term caregiver refers to family members such as spouses or children, and is not associated with paid caregivers. Online supplementary figure 1 shows the analysis pathway to reach the final number of themes.

## RESULTS

### Identification of posts

A search of the stroke forum resulted in 19,214 posts not associated with medication taking being excluded, leaving 2959 posts (see online supplementary figure 1). Additional analysis excluded 2527 posts not about secondary prevention medications. Of the 473 remaining posts, a further 251 were removed as being duplicate



1  
2  
3 or not directly associated with medication adherence. This yielded a total of 222 posts describing barriers/  
4  
5 facilitators of adherence to secondary prevention medication, including 162 posts by stroke survivors, 57 by  
6  
7 caregivers and 3 by an individual whose status as a survivor or caregiver could not be identified.  
8

### 9 10 **Characteristics of study participants**

11  
12 From 222 posts related to adherence to secondary prevention medications we identified 84 individuals.  
13  
14 Approximately 60% of participants were stroke survivors posting about their own experiences with the  
15  
16 remainder being caregivers, predominantly sons or daughters. The age of participants ranged from 32yrs to 91  
17  
18 yrs, male and female were similarly represented (n=40 vs n=38, see table 1). The majority of participants  
19  
20 experienced a stroke within 12 months of posting on the forum. Around three quarters of participants (73%)  
21  
22 reported a stroke occurring within the last 5 years, with 44% experienced a stroke within the last 12 months.  
23  
24 The mean number of years since stroke was 2.2 yrs for survivors and 0.8 yrs for patients talked about by  
25  
26 caregivers. Several participants were prolific users on the forum and were instrumental in facilitating  
27  
28 discussions and providing feedback on a considerable number of topics, offering a rich and in depth  
29  
30 assessment of issues raised. One forum participant wrote 37 posts about secondary prevention medications,  
31  
32 while another 15 posts. The majority of participants (n = 44) posted only once, 19 participants twice and 6  
33  
34 three times. Sample characteristics are reported in table 1.  
35  
36

37 Table 1 about here  
38  
39  
40  
41

### 42 **Themes**

43  
44  
45 The range of themes comprising barriers and facilitators of medication adherence are reported in Table 2. In  
46  
47 line with the PAPA approach<sup>18</sup> these are discussed according to the following two categories.  
48  
49  
50  
51

52 Table 2 about here  
53  
54  
55  
56  
57  
58  
59  
60

1  
2  
3 **Perceptions- Necessity Beliefs and Concerns:** In this section stroke survivors' and caregivers' perceptual  
4 barriers and facilitators of medication adherence are explored, according to their classifications as necessity  
5 beliefs i.e. doubts about personal need for medication to maintain or improve current and future health, and  
6 their concerns about secondary prevention treatment.  
7  
8  
9

10  
11 **Practicalities- Capability and Resources:** In this section we explore barriers and facilitators that stroke  
12 survivors and caregivers face around their capability of taking/giving medication and the resources available  
13 to undertake such behaviour.  
14  
15  
16

17  
18 Within each category themes are grouped into barriers and facilitators. For each of the emerging themes, when  
19 relevant, caregivers' views have been reported after patients' ones.  
20  
21  
22

### 23 **Necessity Beliefs and Concerns - BARRIERS**

#### 24 **Necessity Beliefs**

##### 25 **Lack of perceived benefits of medications**

26  
27  
28 A few users expressed doubts about the role of cholesterol in stroke, questioning the need for taking any  
29 preventative medications at all.  
30  
31  
32

33  
34  
35 A male survivor acknowledged statins controlled cholesterol, but believed strokes occurred regardless  
36 of cholesterol levels. He talked about the 'Cholesterol Myth' having researched the topic online and  
37 admitted feeling confused about taking statins when in reality they weren't needed. [Male, age 67, age  
38 at stroke 55, N.70]  
39  
40  
41  
42

43  
44 A female survivor read about the hype around statins and stated she still didn't have confidence in  
45 them. She had read a research paper on statins suggesting they only added an extra 9 months of  
46 life.[Female, age 56, age at stroke 56, N.66]  
47  
48  
49  
50  
51  
52  
53  
54  
55  
56  
57  
58  
59  
60

### Caregivers' related views

Caregivers struggled with their role of ensuring patients' adherence. They felt survivors' decisions about choosing or refusing medications needed to be evaluated according to patients' preferences and not just in terms of what was clinically right.

A caregiver recognized it was hard to encourage her father to take medications. He suffered many side effects which made him feel less in control so he would choose to go without tablets. She admitted it was important to have a balance regarding what the survivor wanted, considering he stated he would be happier if he felt he was in control. See concluded that patient's choice had to be respected, even if she didn't agree. [Male, age unknown, age at stroke unknown, N.46]

The fact that survivors could suffer a further stroke despite taking secondary prevention medications and following a healthy lifestyle also raised concerns around the benefits of adherence to medications.

A caregiver described how after having a first stroke, her father changed his lifestyle completely by eating well, exercising more and taking medication to control his blood pressure. However one day his BP surged suddenly and he experienced a second stroke. [Male, age unknown, time since stroke 0 yrs, N.55]

### Concerns

#### **Burden and management of medication side effects**

Patients who suffered significant side effects from statins described their experiences, providing insight as to how these were affecting their medication adherence.

A female survivor experienced similar side effects from 3 different statin, despite varying dosage. She said tests confirmed this and had concluded their long term use could lead to many problems which could negatively affect quality of life [Female, age 34, age at stroke 31, N.36]

The experience of side effects led some users to alter adherence to the medications. This was done by 'making a compromise' with health professionals.

1  
2  
3 A male survivor admitted being suspicious of the number and variety of pills he was dispensed. He  
4 said that he had come to a compromise with his doctor about taking blood pressure tablets. He was on  
5 2 tablets for blood pressure, of which one was a diuretic. Having got fed up of frequently running to  
6 the toilet, he decided to check his blood pressure every day and would skip the diuretic if blood  
7 pressure was fine [Male, age unknown, age at stroke unknown, N.63]  
8  
9  
10  
11  
12

13  
14 To avoid side effects, some stroke survivors took the decision to reduce cholesterol through changing diet,  
15 rather than medications, without mentioning whether this decision was taken with or communicated to  
16 healthcare professionals.  
17  
18  
19

20 A female survivor decided to reduce her cholesterol through diet because of unpleasant side effects of  
21 statins. Once symptoms disappeared, she wouldn't take the statins, but instead olive oil and a healthy  
22 diet to keep her cholesterol balanced naturally. She admitted she would continue aspirin as it didn't  
23 seem to cause side effects [Female, age 52, age at stroke 52, N.76]  
24  
25  
26  
27  
28

29 Reducing cholesterol through diet rather than medication was also suggested by GP themselves.  
30  
31

32 A female survivor mentioned her cholesterol level was average. Her nurse suggested starting  
33 medication but her GP was against this, saying the level could be reduced through diet and exercise  
34 alone as these tablets were over prescribed. She added that statins were recommended when needed  
35 because of genetic makeup [meaning familial hypercholesterolemia]. [Female, age 49, age at stroke  
36 48, N.21].  
37  
38  
39  
40  
41  
42

43 Depending on the exact clinical scenario, the decisions about statins in the last two posts could be medically  
44 appropriate or not, i.e. act both as barrier or facilitator to adherence to secondary prevention medications. Due  
45 to lack of details, no definite classification could be made. To reflect this, themes were reported under both  
46 headings in Table 2, but reported only here within the results, for simplicity.  
47  
48  
49  
50  
51  
52  
53  
54  
55  
56  
57  
58  
59  
60

### Caregivers' related views

Caregivers assumed at times the role of advocates for their family members' suffering from medications' side effects, and reported struggling in this role. Failure to be successful in obtaining a change in treatment led some survivors to stop taking medication completely.

A female caregiver described consistently trying to have her husband's 40mg statin dosage reduced by his GP. As a result of the high dosage he was chronically tired, so he stopped taking statins. [Male, age 54, age at stroke 52, N.68]

### **Impact of bad press on statin**

Side effects of secondary prevention medications raised important concern, and statins were frequently discussed by forum users. The bad press about statins was mentioned in relation to starting the medication and ongoing adherence. Participants discussed these concerns together with health care professionals.

A survivor wrote that despite her GP's recommendation she couldn't commence statins after reading in the press about side effects. She admitted she felt well and didn't want to jeopardise that, as she wasn't convinced she needed them. Although also her consultant disagreed with her decision and was keen for her to take them, he said she didn't necessarily have to take them. [Female, age 54, age at stroke 54, N.37]

### Caregivers' related views

Reading information about statins and their side effects highlighted caregivers' struggle and made more difficult for them to help stroke survivors being adherent.

A caregiver's mother had suffered 2 mini strokes and was now prescribed both aspirin as well as pills to lower cholesterol but was refusing to take these as she had read in the press about the bad side effects they caused [Female, age unknown, age at stroke unknown, N.74]

### **Questioning prescribing practices**

Disappointment was expressed when practitioners failed to start/change secondary prevention medications when the survivor judged their current treatment to be inadequate.

1  
2  
3 A survivor described feeling let down as he requested changes in medications because he didn't feel  
4 they [aspirin and clopidogrel] were beneficial. He'd lost confidence in the health care system after  
5 visiting several consultants and being sent home with unchanged medications. [Male, age 43, age at  
6 stroke 41, N.20]  
7  
8  
9

10  
11 Or when the medication prescribed to the stroke survivor was perceived as incorrect:  
12

13  
14 A survivor recalled being on 75mg of aspirin as well as beta blockers. He felt that if he had been  
15 taking warfarin instead of aspirin, he may not have suffered another stroke [Male, age 67, age at  
16 stroke 55, N.82]  
17  
18  
19

20  
21 Receiving conflicting advice on medication practices caused further uncertainty and confusion, which might  
22 have indirectly affected adherence to secondary prevention medications.  
23

24  
25 A survivor suffered increased bleeding while on warfarin was taken off it. He suffered another stroke  
26 shortly after, and was put back on warfarin for the bleeding to begin again. He felt confused at being  
27 told to stay on warfarin to avoid a potentially serious stroke. [Male, aged 72, age at stroke 72, N.10]  
28  
29  
30  
31  
32  
33  
34

### 35 Caregivers' related views

36  
37 Caregivers too raised concerns about GPs prescribing, principally statins, for financial rather than medical  
38 reasons, which could indirectly affect adherence, especially in patients suffering from statin side effects.  
39  
40

41  
42 A caregiver (sister) suggested that GPs shouldn't be paid for prescribing statins and that the decision  
43 should be based on clinical judgement alone. She suggested medication could be overprescribed as a  
44 result for financial reasons [Gender and age unknown, age at stroke unknown, N.78]  
45  
46  
47  
48

49 Caregivers' role as advocates for their family members came up in questioning prescribing practices,  
50 highlighting caregivers' awareness of guidelines and difficulties at times with obtaining treatment  
51 modifications on patients' behalf. (The cost of atorvastatin has dropped since, so this post does not reflect  
52 current practice).  
53  
54  
55  
56  
57  
58  
59  
60

1  
2  
3 A caregiver recommended being firm with GPs about being put on atorvastatin if simvastatin was not  
4 tolerated, as atorvastatin was a bit more expensive but recommended by NICE guidelines as an  
5 alternative [Gender and age unknown, age at stroke unknown, N.18].  
6  
7  
8  
9

## 10 11 **Necessity Beliefs and Concerns – FACILITATORS**

### 12 Necessity beliefs

#### 13 **Attributing importance to secondary prevention medications**

14  
15  
16 The importance of secondary prevention medication in reducing the risk of a stroke event was acknowledged  
17 by forum users. Prioritising secondary prevention tablets over other types of medications highlighted the  
18 significance survivors attached to adherence to these medications. These posts were often written in reply to  
19 users complaining of medication side effects.  
20  
21  
22  
23  
24

25  
26 A female survivor commented that it was better to take a few extra tablets from the GP than to  
27 experience another stroke. Tablets were provided to prevent a further stroke, and she stressed that they  
28 shouldn't be stopped except on professional advice [Female, age 51, age at stroke 51, N.17]  
29  
30  
31  
32

33  
34 Another survivor mentioned feeling reassured by medications, particularly warfarin.  
35  
36

37  
38 A female survivor mentioned that although she had suffered 2 strokes in the previous year, none had  
39 occurred since commencing warfarin. She felt reassured about taking warfarin and she was now  
40 worried about coming off the medication as she had already experienced flashing in her left eye since  
41 she had started to be weaned off the drug [Survivor, female, age 42, age at stroke 42, N.35]  
42  
43  
44  
45  
46

#### 47 Caregivers' related views

48  
49 Caregivers also recognized the importance of medications and the need to continue taking tablets despite  
50 experiencing side effects. The importance of only stopping medication on GP's advice was highlighted.  
51  
52

53  
54 A caregiver admitted that because of side-effects her husband had voluntarily come off all the  
55 medication he was taking, except for aspirin which he continued to use. She said they had agreed to  
56  
57  
58

1  
2  
3 this together with the GP and stressed the importance of doing so before stopping tablets. [Male, age  
4  
5 54, age at stroke 52, N.68]  
6  
7  
8  
9

### 10 11 **Experiencing consequences of non-adherence as driver of necessity beliefs**

12  
13 Experiencing the consequences of medication nonadherence after having another stroke reinforced necessity  
14  
15 beliefs about secondary prevention medications.  
16

17  
18 A survivor who had already suffered 2 strokes admitted it was impossible to ever fully recover from  
19  
20 the stroke experience. He said after his first stroke he was prescribed tablets he didn't take and after  
21  
22 suffering the second stroke he realised this was a big mistake. [Male, age 67, age at stroke 55, N.82]  
23

24  
25 A survivor refused statins after her first stroke because of side effects. However, after suffering a  
26  
27 second one she was now worried enough to take them. [Survivor, female, age 68, age at stroke 67,  
28  
29 N.14]  
30

### 31 Caregivers' related views

32  
33  
34 Caregivers generally held strong beliefs about the need for secondary prevention medications.  
35

36  
37 A caregiver (husband) advised that if patients don't take medications they're likely to become worse.  
38  
39 He was amazed about how many people choose not to take their tablets, perhaps half of them, and few  
40  
41 even did so when they knew they had a meeting with the consultant in the coming weeks. [Female,  
42  
43 age 46, age at stroke 46, N.12]  
44

45  
46 A caregiver (daughter) mentioned that her father wasn't taking medication routinely. He had had a  
47  
48 massive stroke just a few weeks earlier. She wanted to say to forum users that if stroke survivors  
49  
50 follow a healthy lifestyle and are strict with medications, then there is no reason why a major stroke  
51  
52 could not be prevented. [Male, age 55, age at stroke 55, N.6]  
53  
54  
55  
56  
57  
58  
59  
60



## **Concerns**

### **Absence of side effects**

Survivors who did not experience medication side effects generally felt that taking medication was a positive preventive measure against stroke. Although threads of discussion were not analysed, these posts often were written in reply to users who complained about suffering from side effects.

A male survivor advised it was better taking tablets than risking another mini-stroke. He had a severe stroke himself and was prescribed aspirin and simvastatin. He never experienced side effects and also knew others on the same statin who didn't experience any either. [Male age 67, age at stroke 63, N.52]

### **Successfully managing side effects**

Forum users reported changes in secondary prevention medications being made by the health professionals to counteract negative side effects, which helped adherence.

A male survivor described that on a dosage of 8mg of warfarin he started to suffer migraines and bleeding, leading him to refuse the drug. After further conclusive tests, the consultant decided to take him off warfarin as he was taking persantin, which never gave him a headache or nosebleed. He acknowledged warfarin was an important drug, but didn't suit everyone. [Male, age 49, age at stroke 49, N.47]

Some survivors reflected on the role of GPs in their adherence. They felt that the GP's role was to provide advice. Getting support from family in medication related decisions was considered important.

A male survivor agreed to stop taking a blood pressure tablet with his doctor because of intolerable side effects, and his wife being a nurse made it easier. He felt strongly that doctors are there to advise not instruct. [Male, age unknown, age at stroke unknown, N.63]

Doctors' and patients' perseverance in modifying medications was important to achieve optimal treatment.

1  
2  
3 A male survivor admitted taking up to 7 different blood pressure tablets and that it was unusual for a  
4 stroke patient to only need a few. He recommended going back to the GP as necessary to keep  
5 changing tablets until the right combination was found [Male, age 52, age at stroke 52, N.64]  
6  
7  
8

#### 9 10 Caregiver view

11  
12 Reduction of tablet dosage by doctors to eliminate side effects was reported as a successful strategy to deal  
13 with side effects and aid adherence.  
14

15  
16  
17 A female caregiver described her husband suffering from considerable side effects from simvastatin  
18 40mg but when the GP changed to atorvastatin at a lower dose of 10mg he was able to cope. [Male,  
19 age 54, age at stroke 54, N.49]  
20  
21  
22  
23

#### 24 25 26 **Trusting healthcare professionals**

27  
28  
29 Healthcare professionals had an important role in patients' trust in secondary prevention medications and  
30 consequently adherence.  
31

32  
33  
34 A survivor described how he trusted his vascular surgeon who had changed his medication from  
35 warfarin to aspirin and statin. The survivor was happy to take aspirin and felt it would be good to  
36 continue as the surgeon also took it regularly, concluding it must be beneficial [Survivor, male, age  
37 35, age at stroke 34, N.71]  
38  
39  
40  
41  
42  
43  
44

### 45 **Capability and resources - BARRIERS**

#### 46 47 **Difficulties taking tablets**

48  
49 Swallowing difficulties were reported when taking tablets, especially in relation to the medication  
50 dipyridamole, due to its size.  
51  
52  
53  
54  
55  
56  
57  
58  
59  
60

1  
2  
3 A male survivor described ‘swallow panic’, i.e. fear of choking when trying to take Dipyridamole  
4 capsules. The user admitted it took around 3 months before he got over that. [Male, age 67, age at  
5 stroke 55, N.70]  
6  
7

8  
9  
10 Size of tablets also caused handling difficulties due to stroke related impairments.

11  
12 A survivor agreed with another user about the problem with the size of dipyridamole tablets, which  
13 were getting stuck in the pill box organizer. [Female, age 46, age at stroke 45, N.30]  
14  
15

### 16 17 18 19 Caregivers’ related views

20  
21 Taking multiple tablets also contributed to treatment burden experienced by caregivers. One caregiver  
22 described how this added to the survivor’s episodic refusal to take any medications.  
23  
24

25  
26 A caregiver was asking advice on encouraging medication taking. He said his mother was on multiple  
27 tablets, up to 4 times a day, but was now refusing to take any at all and this did upset him. Persuading  
28 her to continue taking the most important tablets had taken hours to do. [Male, age 77, age at stroke  
29 77, N.9]  
30  
31  
32  
33

34  
35 Another practical difficulty was dealing with routine appointments which were considered burdensome,  
36 resulting in the survivors being non-adherent to medications.  
37  
38

39  
40 A caregiver (wife) described how her husband was adamant that he was not prepared to take statins  
41 because he didn’t have the time to keep going back to the GP for check-ups. The caregiver admitted  
42 feeling helpless. [Male, age 55, age at stroke 55, N.24]  
43  
44  
45  
46

47  
48 Caregivers of patients with severe disabilities such as aphasia and inability to communicate made their job of  
49 ensuring patients’ adherence a difficult experience.  
50  
51

52  
53 A caregiver said she couldn’t imagine what a stroke survivor was going through, with her mother  
54 unable to communicate following a stroke. She described her mother having difficulties with  
55  
56  
57

1  
2  
3 medications caused by previous changes in treatment. She felt her mother was giving up and wanted  
4 advice on dealing with aphasia. [Caregiver-daughter, age 52, age at stroke 47, N.54]  
5  
6  
7

8  
9 Using Dosette boxes was at times a struggle for survivors with severe disabilities, and a source of worry for  
10 caregivers.  
11

12  
13 A caregiver mentioned that despite using a nomad tray, tablets were still being taken from the wrong  
14 day with several days' worth of tablets being taken in a single day. His father in law often didn't take  
15 the time to work out the days or to look at the calendar [Male, age unknown, age at stroke unknown,  
16 N.40]  
17  
18  
19  
20  
21

22 Another caregiver admitted having to seek advice on the best way to manage the stroke survivor's  
23 medications.  
24

25  
26 A caregiver said he went to the pharmacist and spent half an hour chatting about medications after  
27 which he bought a flip top multi-coloured medication box labeled with the days and doses. He  
28 admitted it took him a while to establish the best way to fill the box without getting confused,  
29 eventually filling it a tablet at a time across the entire week, instead of a day at a time. (Male, age 82,  
30 age at stroke 82, N. 57)  
31  
32  
33  
34  
35  
36  
37

### 38 **Cost of medications**

39 Survivors' highlighted difficulties faced with meeting the cost of stroke medications.  
40

41  
42 A female survivor described being prescribed both aspirin and simvastatin that she had to pay for. She  
43 reported having to take out a credit card to pay for her medication as she was unable to work and did  
44 not have any money coming or any benefits. [Female, age 59, age at stroke 59, N.72]  
45  
46  
47  
48  
49  
50  
51  
52  
53  
54  
55  
56  
57  
58  
59  
60

## Capability and resources – FACILITATORS

### Storage devices for medication management

Stroke survivors reported benefits from using medication aids including pill-boxes and medication wallets to facilitate medication taking behavior. These devices ensured the appropriate medication was being taken at the right time, while also allowing monitoring when boxes needed to be re-filled.

A survivor agreed the storage box was useful to view medication and her husband didn't have to keep asking her whether she had taken her tablets as he could also see. She admitted to being irritated at being constantly asked. The box helped her also with not running out of medications as she filled it weekly and could tell when it was time for a repeat prescription. [Female, age 46, age at stroke 45, N.30]

### Caregivers' related views

Following instructions was considered helpful in facilitating day to day medicine taking. Keeping track of medicines that had been taken was suggested as a method of ensuring good adherence.

A caregiver (son) described making a note on the pill box asking the survivor to turn it over after taking the pills as this would mean the morning pills were now taken. A second instruction invited the survivor to do the same when taking the evening tablet. He suggested to forum users that a simple chart tracking when each medication was taken was also helpful. [Caregiver-son, age 82, age at stroke 82, N.57]

### Good medication taking routines

Linking daily tablet use to an everyday activity or placing tablets in a specific location which then acted as a cue to take the medication was described as helpful by several users.

1  
2  
3 A survivor suggested using a white board and having method in place helped. She remembered taking  
4 her own medications through repetition or linking tablet use to another everyday activity [Female, age  
5 54, age at stroke 46, N.19]  
6  
7  
8

### 9 10 Caregivers' related views

11  
12 Caregivers also played a key role in medication routines when survivors couldn't remember to take tablets.

13  
14  
15 A caregiver (wife) described regularly giving her husband his medication because stroke had caused  
16 short term memory loss and he would forget them or sometimes take them over again. She admitted  
17 she was now in total control of his medication which was fine because she was a nurse with  
18 experience of this. [Female, Age 46, age at stroke 40, N.5]  
19  
20  
21  
22  
23  
24  
25  
26  
27  
28

## 29 **DISCUSSION**

### 30 31 **Summary of main findings**

32  
33 Data from an online forum provided a rich source of information, illuminating on practical and perceptual  
34 barriers and facilitators to adherence to secondary prevention medications in stroke survivors and their  
35 caregivers. These data highlight several points. Concerns around the bad press on statins could result in stroke  
36 survivors being cautious about commencing/keep taking the medication, and opting for a change in diet as an  
37 alternative (potentially a not medically appropriate decision and without healthcare professionals' support).  
38 Survivors expressed concerns about being prescribed medications they considered inappropriate, questioned  
39 GPs' motivation to prescribe medications and at times realised when prescribing mistakes occurred.  
40 Caregivers themselves reported some doubts about the effectiveness of tablets and difficulties in ensuring  
41 good medication adherence, while recognising that it is ultimately a survivor's decision whether or not to take  
42 medication, particularly when suffering from side effects. Indeed, not experiencing side effects from  
43 secondary prevention medications was an important facilitator of adherence. Health professionals successfully  
44 modifying treatment to manage side effects and awareness that not everyone suffers from side effects were  
45  
46  
47  
48  
49  
50  
51  
52  
53  
54  
55  
56  
57  
58  
59  
60

1  
2  
3 reported as increasing the motivation to take secondary prevention treatment. Believing that medications  
4 reduced stroke risk, feeling reassured by taking secondary prevention treatment and experiencing another  
5 cerebrovascular event as consequence of nonadherence were important drivers of necessity beliefs and  
6 supported adherence.  
7  
8  
9

10  
11 Practical barriers included difficulties swallowing capsules, burden of multiple medications, stroke-related  
12 communication impairments (e.g. aphasia) causing patients' confusion with any treatment changes,  
13 difficulties meeting medication costs and with managing storage devices. Caregivers' posts greatly  
14 contributed to these data. They reported that improved patients' adherence was linked to using medications  
15 storage devices, getting help from pharmacists in organising medicines, assuming full control of their family  
16 members' medication taking, and having previous experience and knowledge about medications and their  
17 administration.  
18  
19  
20  
21  
22  
23  
24  
25  
26  
27  
28

### 29 **Strengths and limitations**

30  
31  
32 This study has a number of strengths. Firstly, the method of data collection where descriptions by forum users  
33 capture unprompted thoughts, is unlikely to be affected by self-presentation bias. Information comes from  
34 patients over a wide geographical area and include people who might not take part in traditional research  
35 because of severe disabilities, communication impairments or in the case of caregivers, because of lack of  
36 time.<sup>11</sup> The forum creates a natural environment facilitating exchange in opinions and in-depth discussions  
37 around several topics including secondary prevention medications. The important presence of caregivers in  
38 online discussions is a further strength, offering a unique viewpoint on survivor's medication taking behavior.  
39  
40  
41  
42  
43  
44  
45

46 These findings however should be interpreted with caution. A key limitation of this research was that forum  
47 data was from the years 2004- 2011 and therefore the findings reported here may not reflect current practice in  
48 primary care. Lack of details about the underlying clinical scenarios described in some of the posts made  
49 difficult classifying emerging themes as barriers or facilitators to adherence. In addition, barriers and  
50 facilitators were limited to those identified from the pre-defined search criteria. Different keywords may have  
51 uncovered additional barriers to medication adherence we failed to identify. All forum posts were examined  
52  
53  
54  
55  
56  
57  
58  
59  
60

1  
2  
3 by a moderator prior to being published online which may have restricted the views of some users. Finally,  
4  
5 with the majority of forum users under the age of 70, it is possible that this method of data collection  
6  
7 overlooks a significant proportion of the older stroke population.  
8  
9

### 10 11 12 **Comparisons with existing literature** 13

14  
15 Our investigation shed light on the significance stroke survivors and caregivers attributed to the bad  
16  
17 press on statins, which impacted on their adherence. This is in agreement with a recent investigation  
18  
19 concluding that negative statin related news stories was associated with early discontinuation of statin and  
20  
21 increased risk of death by cardiovascular disease.<sup>24</sup> Furthermore, people already taking statin were found to  
22  
23 be more likely to stop this medication following high media coverage.<sup>25</sup>  
24  
25

26 Findings from the present study also highlight the difficulties experienced by stroke survivors using  
27  
28 blister packaged medication and dosette boxes, despite at the same time outlining their benefit in terms of  
29  
30 adherence. Evidence from a systematic review has demonstrated significant improvement in adherence for  
31  
32 those in the group using reminder packaging<sup>26</sup> as well as using pill boxes and blister packs in packaging  
33  
34 interventions in cardiovascular disease<sup>27</sup> while the use of reminder packaging may be a simple way of  
35  
36 improving adherence to medication<sup>28</sup> With older people know to experience difficulties taking medication,  
37  
38 developing interventions that seek to combine the use of medication management devices with caregiver co-  
39  
40 operation may be one way of addressing the practical challenges they face.  
41  
42  
43  
44

45 Barriers to caring for the stroke survivor post hospital discharge have included a lack of collaboration with the  
46  
47 healthcare team and a lack of community support for the caregiving role<sup>29</sup> as well as insufficient knowledge  
48  
49 and skills to care for the survivor in the home.<sup>30</sup> We described in this study the struggle caregivers face in their  
50  
51 role as advocate of patients, on one side engaging with healthcare professionals for ensuring that  
52  
53 recommended secondary prevention treatment is received, and on the other side wanting to support and  
54  
55 respect patients' decisions about taking or not medications. Caregivers facing this dilemma could benefit from  
56  
57  
58  
59  
60



1  
2  
3 greater support by GPs and pharmacists. Caregivers could play an important role in bridging the gap between  
4 health professional and stroke survivor in primary care and deserve more research and clinical attention.  
5 Developing interventions that seek to encourage active caregivers' engagement in stroke survivors' -  
6 healthcare professionals' shared-decision making can help to address more comprehensively barriers to  
7 adherence as well as deliver a care program tailored to the individual needs of patients.<sup>8</sup>  
8  
9  
10  
11  
12

13  
14  
15  
16 Barriers highlighted here are in line with those reported by another qualitative study, where negative or  
17 erroneous beliefs about tablets, doubts around the effectiveness of medication and concerns about the  
18 consequences of not taking tablets were associated with being low adherers.<sup>31</sup> Greater emphasis on informing  
19 stroke survivors and caregivers about secondary prevention medications in primary care is needed. In a recent  
20 randomised trial evaluating an educational package for stroke survivors and caregivers, participants who  
21 received tailored information along with verbal reinforcement reported a greater satisfaction with medical and  
22 practical services.<sup>32</sup>  
23  
24  
25  
26  
27  
28  
29

30  
31 Survivors' concerns around the need for secondary prevention medication may reflect a wider pattern of  
32 misunderstanding about the benefits of such drugs. In an assessment of attitudes towards taking cardiovascular  
33 medications, caution expressed around medications was linked with how great their risk to health was  
34 perceived to be.<sup>33</sup> A meta-analysis examining the necessity-concerns framework across a range of conditions  
35 found that experiencing the consequences of nonadherence reinforced the subsequent need to take tablets,  
36 acting as a driver of medication adherence,<sup>34</sup> in agreement to what reported in this study by both stroke  
37 survivors and caregivers.  
38  
39  
40  
41  
42  
43  
44  
45

46 Although statins are known to reduce the risk of stroke by as much as 25%,<sup>35</sup> benefits are undermined by  
47 suboptimal adherence. In a previous examination on patient perspectives around statin therapy, compliance  
48 with statins was associated with information provided during the practitioner consultation as well as the  
49 beliefs about cholesterol and current health status<sup>36</sup>. This concurs with the findings in our study. In a recent  
50 investigation exploring nonadherence and patient's perceptions towards statins, it was found that up to three  
51  
52  
53  
54  
55  
56  
57  
58  
59  
60

1  
2  
3 quarters of participants doubted the necessity of statins, lacked knowledge about this medication, and  
4  
5 concerns around side effects were significantly associated with intentional nonadherence.<sup>37</sup>  
6

7  
8 In this online forum we found evidence that stroke survivors establish routines and use cues to facilitate  
9  
10 medication taking. This is in agreement with the findings from a pilot trial in which a plan to establish  
11  
12 medication routine resulted in significantly greater adherence among survivors.<sup>38,39</sup> Providing support to  
13  
14 establish medication taking routines particularly among older patients with stroke can be beneficial.<sup>40</sup>

15  
16 Challenges to adherence with warfarin therapy, including beliefs about the need for this treatment have been  
17  
18 highlighted previously, suggesting the benefit of a more collaborative patient - practitioner approach, focusing  
19  
20 on education around anticoagulant therapy.<sup>41</sup>  
21

### 22 23 24 25 **Implications for clinical practice** 26

27  
28 These findings demonstrate the need to address identified barriers to adherence to secondary prevention  
29  
30 medications within clinical practice. Improving patient- and caregiver-practitioner communication through  
31  
32 more effective clinical consultations has the potential to benefit patients and encourage a greater  
33  
34 understanding of the importance of secondary prevention medications. This approach could contribute not  
35  
36 only to shape patients' beliefs about medications but also to improve confidence around taking them.

37  
38 Challenging negative medication beliefs and adopting practices that implement simple medication taking  
39  
40 routines and appropriate use of tablet storage devices can increase adherence and ultimately improve health  
41  
42 outcomes.<sup>40,41</sup>  
43

44  
45 Both primary and secondary healthcare professionals should seek to engage the family of survivors and their  
46  
47 support network to challenge concerns around taking tablets, offer reassurance on the benefits of medications,  
48  
49 discuss the need of treatment in light of side effects, and even support patients' informed decision to refuse  
50  
51 medications.  
52

53  
54 Interventions using 'expert patients' or 'expert caregivers' providing support to stroke survivors and  
55  
56 caregivers in the primary care setting hold potential.<sup>15</sup>  
57

1  
2  
3 Internet fora for patients with stroke provide a potentially important resource through which the attitudes of  
4 survivors and their caregivers towards medication use can be better understood.  
5  
6  
7

### 8 9 **Future research**

10  
11  
12 Our study suggests that caregivers play an important role in bridging the gap between patient and practitioner  
13 with regard to informing and facilitating the medication taking process. Future research should therefore  
14 further explore their role in stroke survivors' medication taking and systematically incorporate them in  
15 adherence interventions.  
16  
17  
18

19  
20 Given the strong focus of forum users on statins, understanding why stroke survivors choose not to take  
21 statins as prescribed and suggesting to healthcare professionals effective ways of dealing with this issue  
22 should be a key focus for research in this area. With adverse events the most common reason for poor  
23 adherence to statin therapy, improved patient understanding of this medication through greater  
24 communication with the practitioner can help to address ongoing concerns.<sup>42</sup>  
25  
26  
27

28  
29 Future interventions should aim at further improving medication taking routines after stroke, using cues to  
30 prompt tablet taking. Advances in technology could facilitate delivery of such interventions. One novel  
31 approach to improving adherence particularly with regards to multiple medications is the use of fixed-dose  
32 combination therapy 'polypill approach'.<sup>43</sup> Indeed a recent systematic review of barriers and facilitators of  
33 adherence to secondary prevention medications within cardiovascular disease found fixed dose combination  
34 (FDC) therapy to be an important facilitator associated with high adherence.<sup>38</sup>  
35  
36  
37  
38  
39  
40  
41  
42  
43  
44  
45

### 46 **Conclusion**

47  
48  
49 This study identified barriers and facilitators to medication adherence for stroke through analysing data from  
50 an online forum using a framework approach. Developing interventions which build on these results according  
51 to the framework has the potential to improve medication adherence and ultimately reduce the burden of  
52 stroke. Greater efforts are needed to meet the growing challenges faced by stroke survivors and their  
53  
54  
55  
56  
57  
58  
59  
60

1  
2  
3 caregivers and to enable primary care clinicians to effectively address the burden of nonadherence to  
4  
5 secondary prevention medications.  
6

#### 7 Acknowledgements

8  
9  
10 The authors are grateful to the Stroke Association for permission to analyse the archives of the TalkStroke  
11  
12 forum.  
13

#### 14 Competing Interests

15  
16  
17 None declared  
18

#### 19 Author/s contribution

20  
21  
22 ADS conceived of the study, is the Chief Investigator, contributed to the data analysis and commented on the  
23  
24 manuscript. JM is a co-investigator on the study, wrote and commented on the manuscript. SS is a co-  
25  
26 investigator on the study, wrote and commented on the manuscript. JJ contributed to the study design,  
27  
28 conducted the data analysis and prepared the manuscript for submission. All authors agreed on the final draft  
29  
30 of the submitted manuscript.  
31  
32

#### 33 References

- 34  
35  
36  
37 1. Jørgensen HS, Nakayama H, Reith J, et al. Stroke recurrence: predictors, severity, and prognosis. The  
38  
39 Copenhagen Stroke Study. *Neurology* 1997;**48**(4):891-95.  
40  
41 2. Scarborough P, Peto, V., Bhatnagar, P., Kaur, A., Leal, J., Luengo-Fernandez, R., Gray, A., Rayner, M.,  
42  
43 Allender, S., 1. Stroke statistics: 2009 Edition, 2009.  
44  
45 3. Wolf PA, Clagett GP, Easton JD, et al. Preventing Ischemic Stroke in Patients With Prior Stroke and  
46  
47 Transient Ischemic Attack. A Statement for Healthcare Professionals From the Stroke Council of the  
48  
49 American Heart Association 1999;**30**(9):1991-94.  
50  
51 4. Hankey GJ. Secondary stroke prevention. *The Lancet Neurology* 2014;**13**(2):178-94.  
52  
53 5. Yusuf S. Two decades of progress in preventing vascular disease. *The Lancet* 2002;**360**(9326):2-3.  
54  
55  
56  
57  
58  
59  
60

- 1  
2  
3 6. Souter C, Kinnear A, Kinnear M, et al. Optimisation of secondary prevention of stroke: a qualitative study  
4 of stroke patients' beliefs, concerns and difficulties with their medicines. *International Journal of*  
5 *Pharmacy Practice* 2014;**22**(6):424-32.  
6  
7
- 8  
9 7. Kronish I, Diefenbach M, Edmondson D, et al. Key Barriers to Medication Adherence in Survivors of  
10 Strokes and Transient Ischemic Attacks. *Journal of General Internal Medicine* 2013;**28**(5):675-82.  
11  
12
- 13 8. Bauler S, Jacquin-Courtois S, Haesebaert J, et al. Barriers and Facilitators for Medication Adherence in  
14 Stroke Patients: A Qualitative Study Conducted in French Neurological Rehabilitation Units.  
15 *European Neurology* 2014;**72**(5-6):262-70.  
16  
17
- 18  
19 9. Kelly-Hayes M, Beiser A, Kase CS, et al. The influence of gender and age on disability following ischemic  
20 stroke: the Framingham study. *Journal of Stroke and Cerebrovascular Diseases* 2003;**12**(3):119-26.  
21  
22
- 23 10. De Simoni A, Mant J, Sutton S. Adherence to medication in stroke survivors dependent on caregivers.  
24 *British Journal of General Practice* 2015;**65**(640):e789.  
25  
26
- 27 11. De Simoni A, Shanks A, Mant J, et al. Making sense of patients' internet forums: a systematic method  
28 using discourse analysis. *British Journal of General Practice* 2014;**64**(620):e178-e80.  
29  
30
- 31 12. De Simoni A, Shanks A, Mant J, et al. Making sense of patients' internet forums: a systematic method  
32 using discourse analysis. *The British Journal of General Practice* 2014;**64**(620):e178-e80.  
33  
34
- 35 13. Travis SS, Bethea LS, Winn P. Medication Administration Hassles Reported by Family Caregivers of  
36 Dependent Elderly Persons. *The Journals of Gerontology Series A: Biological Sciences and Medical*  
37 *Sciences* 2000;**55**(7):M412-M17.  
38  
39
- 40 14. Jamison J, Graffy J, Mullis R, et al. Barriers to medication adherence for the secondary prevention of  
41 stroke: a qualitative interview study in primary care. *British Journal of General Practice* 2016.  
42  
43
- 44 15. Aggarwal B, Liao M, Mosca L. Medication Adherence Is Associated with Having a Caregiver Among  
45 Cardiac Patients. *Annals of Behavioral Medicine* 2013;**46**(2):237-42.  
46  
47
- 48 16. De Simoni A, Shanks A, Balasooriya-Smeekens C, et al. Stroke survivors and their families receive  
49 information and support on an individual basis from an online forum: descriptive analysis of a  
50 population of 2348 patients and qualitative study of a sample of participants. *BMJ Open* 2016;**6**(4).  
51  
52  
53  
54  
55  
56  
57  
58  
59  
60

- 1  
2  
3 17. Balasooriya-Smeekens C, Bateman A, Mant J, et al. Barriers and facilitators to staying in work after  
4  
5 stroke: insight from an online forum. *BMJ Open* 2016;**6**(4).
- 6  
7 18. Horne R. Compliance adherence and Concordance. In: Harding KTG, ed. *Pharmacy Practice*. London:  
8  
9 Taylor & Franics, 2001.
- 10  
11 19. Horne R WJ, Barber N, Elliott R, Morgan M. Concordance, adherence and compliance in medicine –  
12  
13 taking. Report for the National Co-ordinating Centre for NHS Service Delivery and Organisation  
14  
15 R&D, 2005.
- 16  
17 20. Anthony L. AntConc (Version 3.2.4) [Computer Software]. Tokyo, Japan: Waseda University; 2016  
18  
19 [Available from: Available from <http://www.laurenceanthony.net/>.
- 20  
21 21. Eysenbach G, Till JE. Ethical issues in qualitative research on internet communities. *BMJ*  
22  
23 2001;**323**(7321):1103-05.
- 24  
25 22. Braun V, Clarke V. Using thematic analysis in psychology. *Qualitative Research in Psychology*  
26  
27 2006;**3**(2):77-101.
- 28  
29 23. Esquivel A, Meric-Bernstam F, Bernstam EV. Accuracy and self correction of information received from  
30  
31 an internet breast cancer list: content analysis. *BMJ* 2006;**332**(7547):939-42.
- 32  
33 24. Nielsen SF, Nordestgaard BG. Negative statin-related news stories decrease statin persistence and increase  
34  
35 myocardial infarction and cardiovascular mortality: a nationwide prospective cohort study. *European*  
36  
37 *Heart Journal* 2016;**37**(11):908-16.
- 38  
39 25. Matthews A, Herrett E, Gasparrini A, et al. Impact of statin related media coverage on use of statins:  
40  
41 interrupted time series analysis with UK primary care data. *BMJ* 2016;**353**.
- 42  
43 26. Boeni F, Spinatsch E, Suter K, et al. Effect of drug reminder packaging on medication adherence: a  
44  
45 systematic review revealing research gaps. *Systematic Reviews* 2014;**3**(1):29.
- 46  
47 27. Conn VS, Ruppap TM, Chan KC, et al. Packaging interventions to increase medication adherence:  
48  
49 systematic review and meta-analysis. *Current Medical Research and Opinion* 2015;**31**(1):145-60.
- 50  
51 28. Mahtani KR, Heneghan CJ, Glasziou PP, et al. Reminder packaging for improving adherence to self-  
52  
53 administered long-term medications. *Cochrane Database Syst Rev*, 2011.
- 54  
55  
56  
57  
58  
59  
60

- 1  
2  
3 29. White CL, Korner-Bitensky N, Rodrigue N, et al. Barriers and facilitators to caring for individuals with  
4 stroke in the community: the family's experience. *Canadian journal of neuroscience nursing*  
5 2007;**29**(2):5-12.  
6  
7  
8  
9 30. Smith LN, Lawrence M, Kerr SM, et al. Informal carers' experience of caring for stroke survivors. *Journal*  
10 *of Advanced Nursing* 2004;**46**(3):235-44.  
11  
12 31. Chambers JA, O'Carroll RE, Hamilton B, et al. Adherence to medication in stroke survivors: A qualitative  
13 comparison of low and high adherers. *British Journal of Health Psychology* 2011;**16**(3):592-609.  
14  
15  
16 32. Eames S, Hoffmann T, Worrall L, et al. Randomised controlled trial of an education and support package  
17 for stroke patients and their carers. *BMJ Open* 2013;**3**(5).  
18  
19  
20 33. Gale NK, Greenfield S, Gill P, et al. Patient and general practitioner attitudes to taking medication to  
21 prevent cardiovascular disease after receiving detailed information on risks and benefits of treatment:  
22 a qualitative study. *BMC Family Practice* 2011;**12**(1):1-10.  
23  
24  
25  
26 34. Horne R, Chapman SCE, Parham R, et al. Understanding Patients' Adherence-Related Beliefs about  
27 Medicines Prescribed for Long-Term Conditions: A Meta-Analytic Review of the Necessity-Concerns  
28 Framework. *PLOS ONE* 2013;**8**(12):e80633.  
29  
30  
31 35. Afilalo J, Duque G, Steele R, et al. Statins for Secondary Prevention in Elderly Patients: A Hierarchical  
32 Bayesian Meta-Analysis. *Journal of the American College of Cardiology*; **51**(1):37-45.  
33  
34  
35 36. Tolmie EP, Lindsay GM, Kerr SM, et al. Patients' Perspectives on Statin Therapy for Treatment of  
36 Hypercholesterolaemia: A Qualitative Study. *European Journal of Cardiovascular Nursing*  
37 2003;**2**(2):141-49.  
38  
39  
40 37. Wouters H, Van Dijk L, Geers HCJ, et al. Understanding Statin Non-Adherence: Knowing Which  
41 Perceptions and Experiences Matter to Different Patients. *PLoS ONE* 2016;**11**(1):e0146272.  
42  
43  
44 38. Banerjee A, Khandelwal S, Nambiar L, et al. Health system barriers and facilitators to medication  
45 adherence for the secondary prevention of cardiovascular disease: a systematic review. *Open Heart*  
46 2016;**3**(2).  
47  
48  
49 39. O'Carroll RE, Chambers JA, Dennis M, et al. Improving adherence to medication in stroke survivors: a  
50 pilot randomised controlled trial. *Ann Behav Med* 2013;**46**(3):358-68.  
51  
52  
53  
54  
55  
56  
57  
58  
59  
60

- 1  
2  
3 40. Sanders MJ, Van Oss T. Using Daily Routines to Promote Medication Adherence in Older Adults.  
4  
5 American Journal of Occupational Therapy 2013;**67**(1):91-99.  
6  
7 41. Kneeland PP, Fang MC. Current issues in patient adherence and persistence: focus on anticoagulants for  
8  
9 the treatment and prevention of thromboembolism. Patient preference and adherence 2010;**4**:51-60.  
10  
11 42. Maningat P, Gordon BR, Breslow JL. How Do We Improve Patient Compliance and Adherence to Long-  
12  
13 Term Statin Therapy? Current atherosclerosis reports 2013;**15**(1):291-91.  
14  
15 43. Castellano JM, Sanz G, Penalvo JL, et al. A polypill strategy to improve adherence: results from the  
16  
17 FOCUS project. J Am Coll Cardiol 2014;**64**(20):2071-82.  
18  
19  
20  
21  
22  
23  
24  
25  
26  
27  
28  
29  
30  
31  
32  
33  
34  
35  
36  
37  
38  
39  
40  
41  
42  
43  
44  
45  
46  
47  
48  
49  
50  
51  
52  
53  
54  
55  
56  
57  
58  
59  
60



| <b>Sample characteristics</b>                                       | <b>N</b> | <b>Median Range</b> |
|---------------------------------------------------------------------|----------|---------------------|
| Total participants identified in posts                              | 84       |                     |
| Number of posts in the forum/ participant                           |          | 16 (1-4932)         |
| Number of posts about secondary prevention medications/ participant |          | 1 (1-37)            |
| <b>Age at stroke</b>                                                |          |                     |
| Survivor                                                            |          | 50 (32-72)          |
| Patient by caregiver                                                |          | 66 (46-91)          |
| <b>Gender</b>                                                       |          |                     |
| Male -Survivor                                                      | 20       |                     |
| Female- Survivor                                                    | 26       |                     |
| Not known - Survivor                                                | 3        |                     |
| Male -Patient talked about by caregiver                             | 20       |                     |
| Female - Patient by caregiver*                                      | 12       |                     |
| Unknown gender and unknown identity                                 | 3        |                     |
| <b>Identity person posting</b>                                      |          |                     |
| Stroke survivor                                                     | 49       |                     |
| Caregiver                                                           | 33       |                     |
| Not known                                                           | 2        |                     |
| <b>Years since stroke</b>                                           |          |                     |
| (0-12 mths)                                                         | 37       |                     |
| (1-5 yrs)                                                           | 25       |                     |
| (6-10 yrs)                                                          | 4        |                     |
| (11-15 yrs)                                                         | 2        |                     |
| (15+ yrs)                                                           | 1        |                     |
| Unknown                                                             | 15       |                     |
| <b>Caregiver identity</b>                                           |          |                     |
| Daughter /son                                                       | 20       |                     |
| Spouse                                                              | 9        |                     |
| Other (/in law/ sister)                                             | 3        |                     |
| Unknown                                                             | 1        |                     |

Legend: \* Patient talked about by a caregiver

Table 1. Characteristics of online Talkstroke participants as identified in the study posts

Table 2. Key themes highlighting survivors' and caregivers' barriers and facilitators to adherence to secondary prevention medications classified according to perceptions and practicalities.

| Perceptions –Necessity Beliefs and Concerns                                                                                                                                                                                                                                                                                                                                                                                                                                                                                                                                                                                                                                                                                                                                                                                                                                                                                                                                                                                                                                                                                   |                                                                                                                                                                                                                                                                                                                                                                                                                                                                                                                                                                                                                                                                                                                                                                                                                                                                                                                                                                                                                                                                                                 |
|-------------------------------------------------------------------------------------------------------------------------------------------------------------------------------------------------------------------------------------------------------------------------------------------------------------------------------------------------------------------------------------------------------------------------------------------------------------------------------------------------------------------------------------------------------------------------------------------------------------------------------------------------------------------------------------------------------------------------------------------------------------------------------------------------------------------------------------------------------------------------------------------------------------------------------------------------------------------------------------------------------------------------------------------------------------------------------------------------------------------------------|-------------------------------------------------------------------------------------------------------------------------------------------------------------------------------------------------------------------------------------------------------------------------------------------------------------------------------------------------------------------------------------------------------------------------------------------------------------------------------------------------------------------------------------------------------------------------------------------------------------------------------------------------------------------------------------------------------------------------------------------------------------------------------------------------------------------------------------------------------------------------------------------------------------------------------------------------------------------------------------------------------------------------------------------------------------------------------------------------|
| Barriers                                                                                                                                                                                                                                                                                                                                                                                                                                                                                                                                                                                                                                                                                                                                                                                                                                                                                                                                                                                                                                                                                                                      | Facilitators                                                                                                                                                                                                                                                                                                                                                                                                                                                                                                                                                                                                                                                                                                                                                                                                                                                                                                                                                                                                                                                                                    |
| <p><u>Necessity beliefs</u></p> <p>Lack of perceived benefits of medication</p> <ul style="list-style-type: none"> <li>• Questioning the effectiveness of secondary prevention medications in preventing stroke recurrence.</li> <li>• Considering statins detrimental to health and not effective.</li> </ul> <p><u>Caregiver</u></p> <ul style="list-style-type: none"> <li>• <i>Valuing adherence but recognising that is the choice of the patient to take tablets.</i></li> <li>• <i>Realising that stroke could still occur despite taking secondary prevention medication.</i></li> </ul> <p><u>Concerns</u></p> <p>Burden and management of medication side effects</p> <ul style="list-style-type: none"> <li>• Experiencing statins side effects and considering they have potential to worsen quality of life.</li> <li>• Intentionally missing medication to manage side effects.</li> <li>• Changing diet/lifestyle as alternative to taking medication to reduce side effects.*</li> <li>• Healthcare professionals recommending diet and exercise to reduce cholesterol instead of taking statins.*</li> </ul> | <p><u>Necessity beliefs</u></p> <p>Attributing importance to secondary prevention medications</p> <ul style="list-style-type: none"> <li>• Recognising taking tablets as important to prevent stroke recurrence.</li> <li>• Feeling reassured by taking secondary prevention medications.</li> <li>• Experiencing consequences of nonadherence (a further stroke) as driver of necessity beliefs.</li> </ul> <p><u>Caregiver</u></p> <ul style="list-style-type: none"> <li>• <i>Feeling secondary prevention medications are important and should only be stopped in consultation with the GP.</i></li> <li>• <i>Holding strong beliefs about the need for secondary prevention medications.</i></li> <li>• <i>Experiencing consequences of nonadherence as driver of necessity beliefs.</i></li> </ul> <p><u>Concerns</u></p> <ul style="list-style-type: none"> <li>• Not experiencing medication side-effects.</li> <li>• Awareness that not all patients are affected by side effects of medications.</li> <li>• Changing diet/lifestyle as alternative to taking medication to</li> </ul> |

|                                                                                                                                                                                                                                                                                                                                                                                                                                                                                                                                                                                                                                                                                                                                                                                                                                                                                                                                                                                                                                                                                                                                                                                          |                                                                                                                                                                                                                                                                                                                                                                                                                                                                                                                                                                                                                                                                                                                                                      |
|------------------------------------------------------------------------------------------------------------------------------------------------------------------------------------------------------------------------------------------------------------------------------------------------------------------------------------------------------------------------------------------------------------------------------------------------------------------------------------------------------------------------------------------------------------------------------------------------------------------------------------------------------------------------------------------------------------------------------------------------------------------------------------------------------------------------------------------------------------------------------------------------------------------------------------------------------------------------------------------------------------------------------------------------------------------------------------------------------------------------------------------------------------------------------------------|------------------------------------------------------------------------------------------------------------------------------------------------------------------------------------------------------------------------------------------------------------------------------------------------------------------------------------------------------------------------------------------------------------------------------------------------------------------------------------------------------------------------------------------------------------------------------------------------------------------------------------------------------------------------------------------------------------------------------------------------------|
| <p><u>Caregiver</u></p> <ul style="list-style-type: none"> <li>Struggling to raise issues about side effects of statins with healthcare professionals and obtaining changes in treatment when patients find it unsuitable.</li> </ul> <p>Impact of bad press on statins</p> <ul style="list-style-type: none"> <li>Being extra-cautious about commencing statins for fear of side effects</li> </ul> <p><u>Caregiver</u></p> <ul style="list-style-type: none"> <li>Struggling to ensure patients' adherence to statins in face of bad press.</li> </ul> <p>Questioning prescribing practices</p> <ul style="list-style-type: none"> <li>Being disappointed as medications considered ineffective were not changed by GPs.</li> <li>Having concerns around incorrect medications being prescribed.</li> <li>Receiving conflicting information about medications.</li> </ul> <p><u>Caregiver</u></p> <ul style="list-style-type: none"> <li>Worrying about medications being prescribed for financial reasons or guidelines over clinical judgement</li> <li>Experiencing difficulties with asking GPs to prescribe alternative tablets as current ones considered unsuitable.</li> </ul> | <p>reduce side effects.*</p> <ul style="list-style-type: none"> <li>Healthcare professionals recommending diet and exercise to reduce cholesterol instead of taking statins.*</li> </ul> <p>Successfully managing side effects</p> <ul style="list-style-type: none"> <li>Obtaining changes in treatment from healthcare professionals until side effects are manageable</li> </ul> <p><u>Caregiver</u></p> <ul style="list-style-type: none"> <li>Obtaining changes in treatment from healthcare professionals until side effects are manageable</li> </ul> <p>Trusting healthcare professionals</p> <ul style="list-style-type: none"> <li>Perceiving medications to be beneficial as secondary healthcare professional also taking it.</li> </ul> |
| <p><b>Practicalities- Capability and Resources</b></p>                                                                                                                                                                                                                                                                                                                                                                                                                                                                                                                                                                                                                                                                                                                                                                                                                                                                                                                                                                                                                                                                                                                                   |                                                                                                                                                                                                                                                                                                                                                                                                                                                                                                                                                                                                                                                                                                                                                      |
| <p><b>Barriers</b></p>                                                                                                                                                                                                                                                                                                                                                                                                                                                                                                                                                                                                                                                                                                                                                                                                                                                                                                                                                                                                                                                                                                                                                                   | <p><b>Facilitators</b></p>                                                                                                                                                                                                                                                                                                                                                                                                                                                                                                                                                                                                                                                                                                                           |
| <p>Difficulties taking tablets</p> <ul style="list-style-type: none"> <li>Swallowing medication capsules, especially big size ones.</li> <li>Experiencing difficulties with handling medications due to size and stroke related physical impairments.</li> </ul> <p><u>Caregiver</u></p> <ul style="list-style-type: none"> <li>Experiencing frustration with burden of multiple medications and episodic patients' refusal of medications.</li> <li>Experiencing frustration at patient refusal to take statins and attend routine medication appointment.</li> </ul>                                                                                                                                                                                                                                                                                                                                                                                                                                                                                                                                                                                                                   | <p>Storage devices for medication management</p> <ul style="list-style-type: none"> <li>Using pill box: helping seeing the correct medication was taken and when prescription needed to be renewed.</li> </ul> <p><u>Caregiver</u></p> <ul style="list-style-type: none"> <li>Using pill-boxes to provide written instruction to patients or keeping a note of tablets taken.</li> </ul>                                                                                                                                                                                                                                                                                                                                                             |

|                                                                                                                                                                                                                                                                                                                                                                                                                                                                                                                         |                                                                                                                                                                                                                                                                                                                                                                                                    |
|-------------------------------------------------------------------------------------------------------------------------------------------------------------------------------------------------------------------------------------------------------------------------------------------------------------------------------------------------------------------------------------------------------------------------------------------------------------------------------------------------------------------------|----------------------------------------------------------------------------------------------------------------------------------------------------------------------------------------------------------------------------------------------------------------------------------------------------------------------------------------------------------------------------------------------------|
| <ul style="list-style-type: none"> <li>• <i>Experiencing difficulties when helping patients with aphasia taking tablets in the context of changes in treatment.</i></li> <li>• <i>Experiencing frustration at patients failing to keep up with refilling prescriptions.</i></li> <li>• <i>Being worried about patients not using the pillbox correctly.</i></li> </ul> <p>Cost of medications</p> <ul style="list-style-type: none"> <li>• Struggling to meet the costs of secondary prevention medications.</li> </ul> | <p>Good medication taking routines</p> <ul style="list-style-type: none"> <li>• Linking tablet use to an everyday activity to facilitate medication taking behaviour.</li> </ul> <p><u>Caregiver</u></p> <ul style="list-style-type: none"> <li>• <i>Assuming control of medication when patients have problems with short term memory and reminding when tablets have to be taken.</i></li> </ul> |
| <p>Legend: Statements in italics refer to caregiver themes.<br/> * Because of missing details of the underlying clinical scenario, these themes could act both as barriers or facilitators to adherence to secondary prevention medications, therefore have been reported under both headings.</p>                                                                                                                                                                                                                      |                                                                                                                                                                                                                                                                                                                                                                                                    |

Figure 1. Analysis strategy to identify study posts

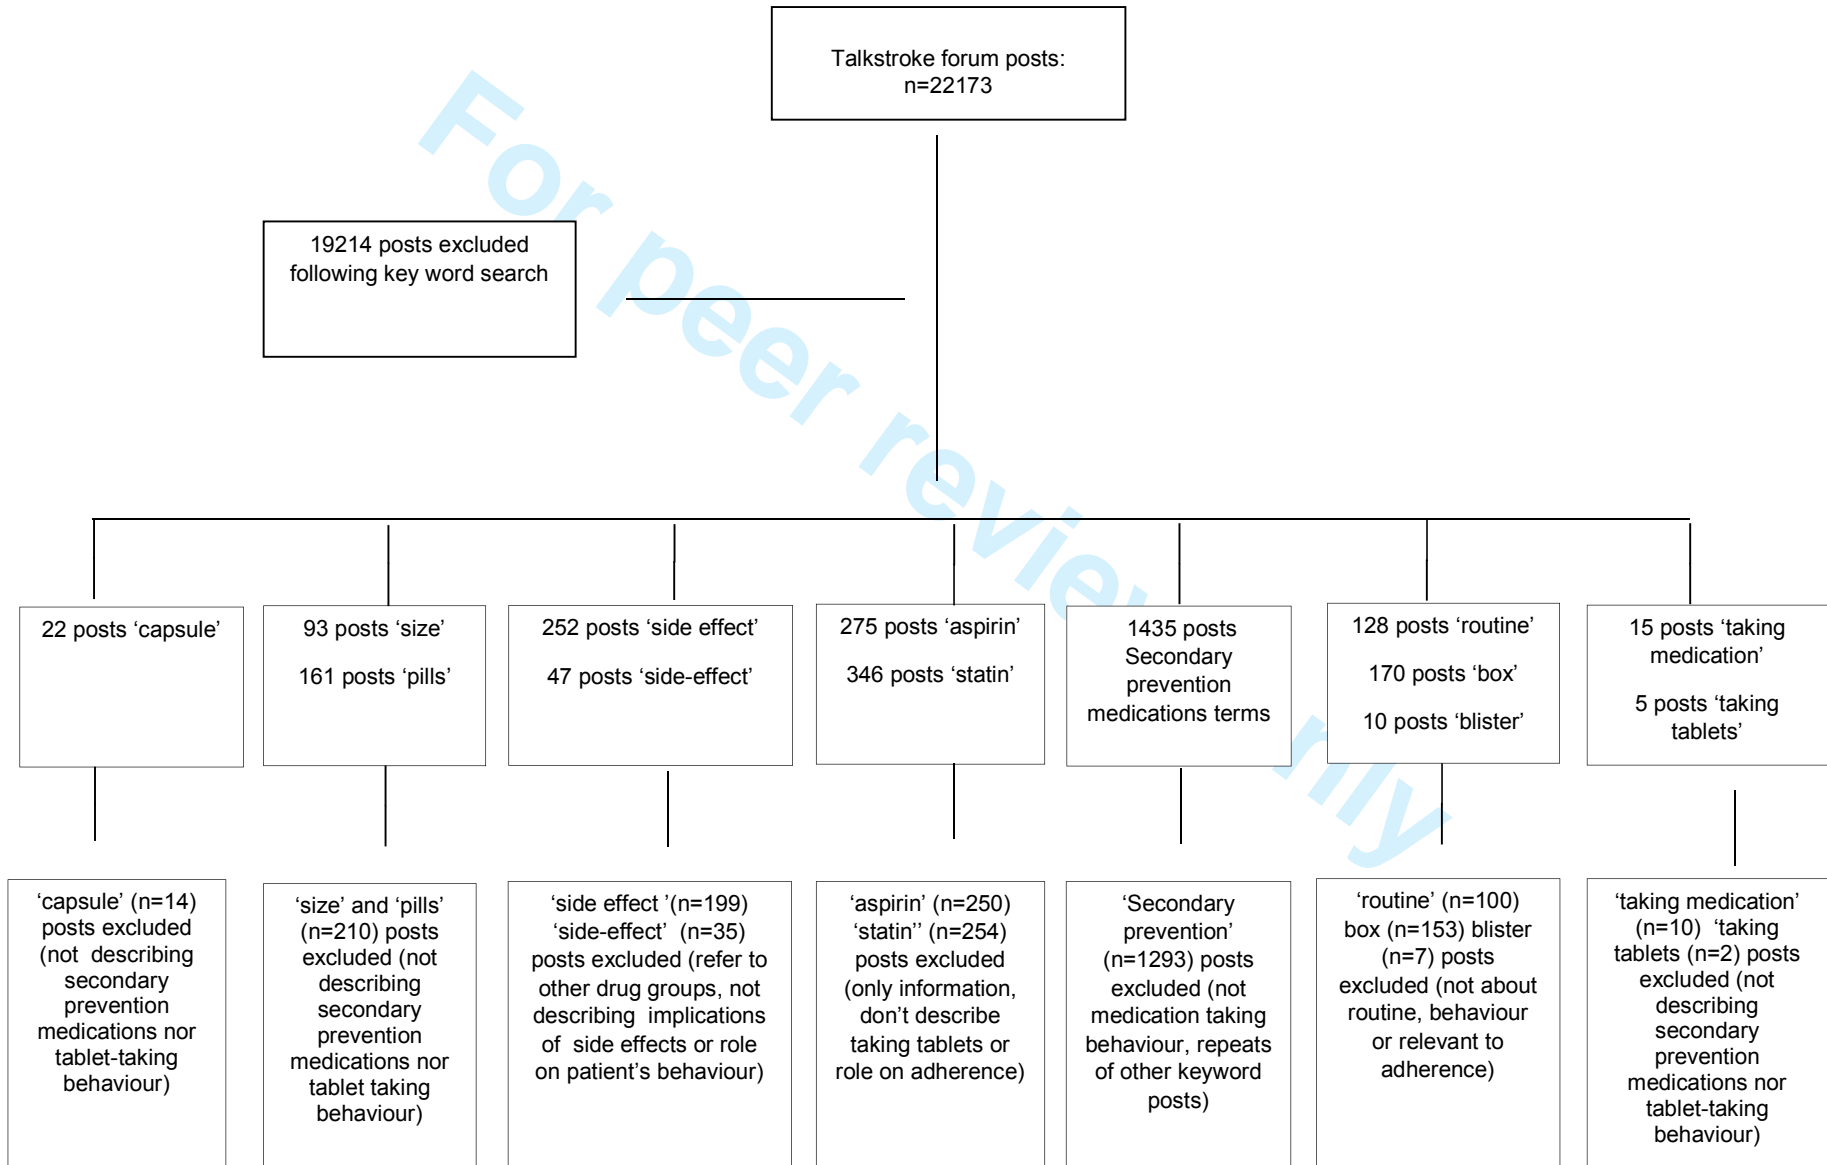

1  
2  
3  
4  
5  
6  
7  
8  
9  
10  
11  
12  
13  
14  
15  
16  
17  
18  
19  
20  
21  
22  
23  
24  
25  
26  
27  
28  
29  
30  
31  
32  
33  
34  
35  
36  
37  
38  
39  
40  
41  
42  
43  
44  
45  
46  
47  
48  
49

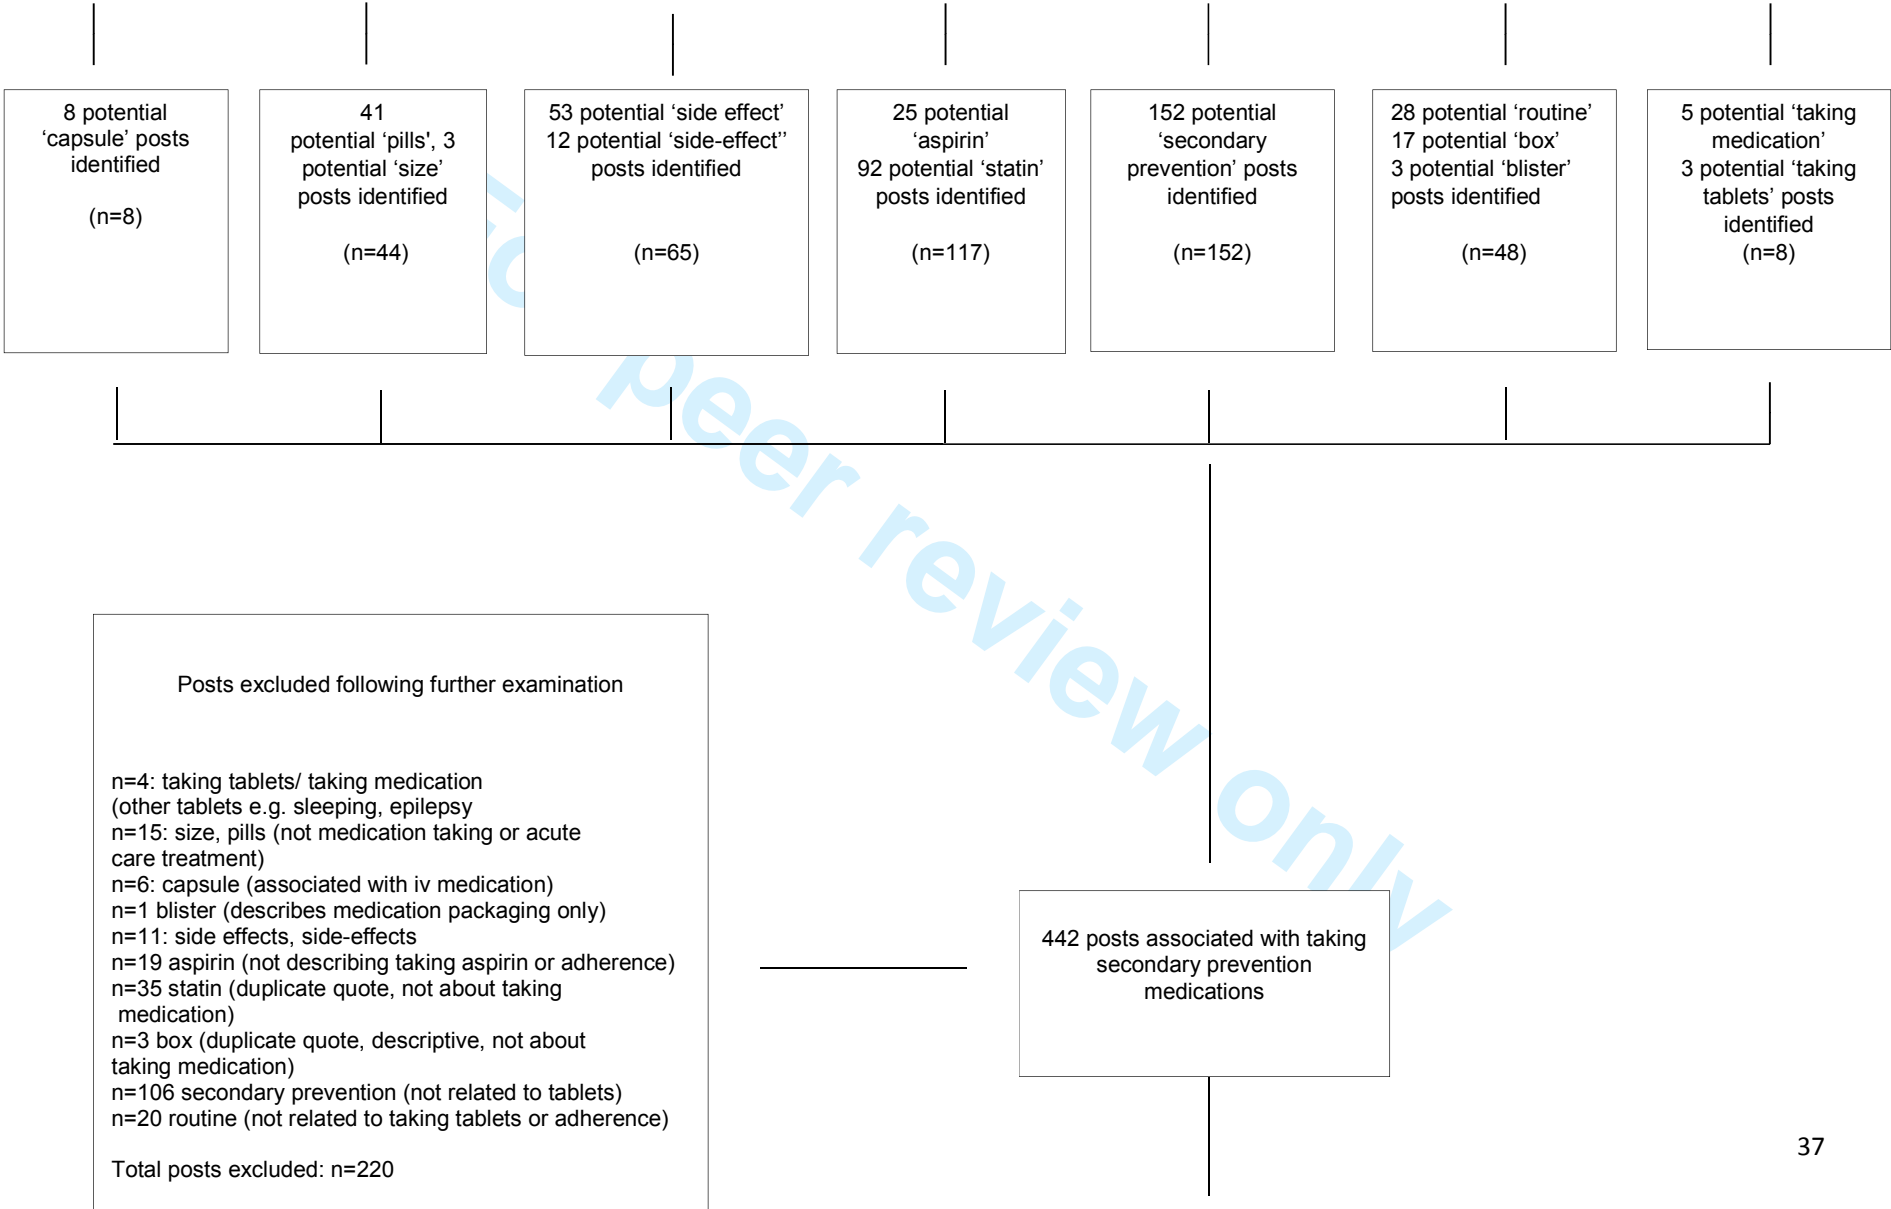

1  
2  
3  
4  
5  
6  
7  
8  
9  
10  
11  
12  
13  
14  
15  
16  
17  
18  
19  
20  
21  
22  
23  
24  
25  
26  
27  
28  
29  
30  
31  
32  
33  
34  
35  
36  
37  
38  
39  
40  
41  
42  
43  
44  
45  
46  
47  
48  
49

Posts analysed: thematic analysis on themes classified as barriers or facilitators of medication adherence.

n= 4: Taking medication/ taking tablets

n= 29: Size, pills

n= 2: Capsule

n= 2: Blister

n= 54: Side effects, side-effects

n= 6: Aspirin

n= 57: Statin

n= 14: Box

n= 46: Secondary prevention medication terms

n= 8: routine

Total posts included: n= 222

Thematic analysis: Development of themes associated with barriers and facilitators of medication adherence

1  
2  
3  
4  
5  
6  
7  
8  
9  
10  
11  
12  
13  
14  
15  
16  
17  
18  
19  
20  
21  
22  
23  
24  
25  
26  
27  
28  
29  
30  
31  
32  
33  
34  
35  
36  
37  
38  
39  
40  
41  
42  
43  
44  
45  
46  
47  
48  
49

For peer review only



1  
2  
3  
4  
5  
6  
7  
8  
9  
10  
11  
12  
13  
14  
15  
16  
17  
18  
19  
20  
21  
22  
23  
24  
25  
26  
27  
28  
29  
30  
31  
32  
33  
34  
35  
36  
37  
38  
39  
40  
41  
42  
43  
44  
45  
46  
47  
48  
49  
50  
51  
52  
53  
54  
55  
56  
57  
58  
59  
60

For peer review only

Consolidated criteria for reporting qualitative studies (COREQ): 32-item checklist

| No                                             | Item                                     | Guide questions/description                                                                                                                      |                                                                         |
|------------------------------------------------|------------------------------------------|--------------------------------------------------------------------------------------------------------------------------------------------------|-------------------------------------------------------------------------|
| <b>Domain 1: Research team and reflexivity</b> |                                          |                                                                                                                                                  |                                                                         |
| Personal Characteristics                       |                                          |                                                                                                                                                  |                                                                         |
| 1.                                             | Interviewer/facilitator                  | Which author/s conducted the interview or focus group?                                                                                           | N/A                                                                     |
| 2.                                             | Credentials                              | What were the researcher's credentials? <i>E.g. PhD, MD</i>                                                                                      | BSc, MSc                                                                |
| 3.                                             | Occupation                               | What was their occupation at the time of the study?                                                                                              | Research Assistant/<br>PhD Student                                      |
| 4.                                             | Gender                                   | Was the researcher male or female?                                                                                                               | Male                                                                    |
| 5.                                             | Experience and training                  | What experience or training did the researcher have?                                                                                             | JJ is a researcher with experience in undertaking qualitative research. |
| Relationship with participants                 |                                          |                                                                                                                                                  |                                                                         |
| 6.                                             | Relationship established                 | Was a relationship established prior to study commencement?                                                                                      | N/A                                                                     |
| 7.                                             | Participant knowledge of the interviewer | What did the participants know about the researcher? <i>e.g. personal goals, reasons for doing the research</i>                                  | N/A                                                                     |
| 8.                                             | Interviewer characteristics              | What characteristics were reported about the interviewer/facilitator? <i>e.g. Bias, assumptions, reasons and interests in the research topic</i> | N/A                                                                     |
| <b>Domain 2: study design</b>                  |                                          |                                                                                                                                                  |                                                                         |
| Theoretical framework                          |                                          |                                                                                                                                                  |                                                                         |
| 9.                                             | Methodological orientation and Theory    | What methodological orientation was stated to underpin the study? <i>e.g. grounded theory, discourse analysis,</i>                               | Thematic analysis:<br><b>Pg. 7</b>                                      |

| No                    | Item                         | Guide questions/description                                                               |                                                                                                                    |
|-----------------------|------------------------------|-------------------------------------------------------------------------------------------|--------------------------------------------------------------------------------------------------------------------|
|                       |                              | <i>ethnography, phenomenology, content analysis</i>                                       |                                                                                                                    |
| Participant selection |                              |                                                                                           |                                                                                                                    |
| 10.                   | Sampling                     | How were participants selected? <i>e.g. purposive, convenience, consecutive, snowball</i> | All users of an online forum who posted comments on medication adherence were eligible for inclusion <b>Pg. 6</b>  |
| 11.                   | Method of approach           | How were participants approached? <i>e.g. face-to-face, telephone, mail, email</i>        | Participants were not directly approached. Information they submitted to an online forum was analysed <b>Pg. 6</b> |
| 12.                   | Sample size                  | How many participants were in the study?                                                  | 84 <b>Pg. 8</b>                                                                                                    |
| 13.                   | Non-participation            | How many people refused to participate or dropped out? Reasons?                           | N/A                                                                                                                |
| Setting               |                              |                                                                                           |                                                                                                                    |
| 14.                   | Setting of data collection   | Where was the data collected? <i>e.g. home, clinic, workplace</i>                         | Data was collected from an online forum electronically and remotely. <b>Pg. 6</b>                                  |
| 15.                   | Presence of non-participants | Was anyone else present besides the participants and researchers?                         | N/A                                                                                                                |
| 16.                   | Description of sample        | What are the important characteristics of the sample? <i>e.g. demographic data, date</i>  | Gender, age, stroke survivor/ caregiver, years since stroke occurred <b>Pg. 8</b>                                  |
| Data collection       |                              |                                                                                           |                                                                                                                    |
| 17.                   | Interview guide              | Were questions, prompts, guides provided by the authors? Was it pilot tested?             | N/A                                                                                                                |
| 18.                   | Repeat interviews            | Were repeat interviews carried out? If yes, how many?                                     | N/A                                                                                                                |
| 19.                   | Audio/visual recording       | Did the research use audio or visual recording to                                         | N/A                                                                                                                |

| No                                     | Item                           | Guide questions/description                                                                                                              |                                                                                                                                          |
|----------------------------------------|--------------------------------|------------------------------------------------------------------------------------------------------------------------------------------|------------------------------------------------------------------------------------------------------------------------------------------|
|                                        |                                | collect the data?                                                                                                                        |                                                                                                                                          |
| 20.                                    | Field notes                    | Were field notes made during and/or after the interview or focus group?                                                                  | N/A                                                                                                                                      |
| 21.                                    | Duration                       | What was the duration of the interviews or focus group?                                                                                  | N/A                                                                                                                                      |
| 22.                                    | Data saturation                | Was data saturation discussed?                                                                                                           | Yes <b>Pg. 7</b>                                                                                                                         |
| 23.                                    | Transcripts returned           | Were transcripts returned to participants for comment and/or correction?                                                                 | No                                                                                                                                       |
| <b>Domain 3: analysis and findings</b> |                                |                                                                                                                                          |                                                                                                                                          |
| Data analysis                          |                                |                                                                                                                                          |                                                                                                                                          |
| 24.                                    | Number of data coders          | How many data coders coded the data?                                                                                                     | 2 authors contributed to the coding process. JJ coded all of the forum posts. 20% of posts were independently coded by ADS. <b>Pg. 7</b> |
| 25.                                    | Description of the coding tree | Did authors provide a description of the coding tree?                                                                                    | Table 2 reports all the themes that were identified and coded from the data. <b>Pg. 33</b>                                               |
| 26.                                    | Derivation of themes           | Were themes identified in advance or derived from the data?                                                                              | Themes were generated from the data <b>Pg. 9-21, 33</b>                                                                                  |
| 27.                                    | Software                       | What software, if applicable, was used to manage the data?                                                                               | Microsoft Excel, Nvivo qualitative analysis software <b>Pg. 6</b>                                                                        |
| 28.                                    | Participant checking           | Did participants provide feedback on the findings?                                                                                       | No                                                                                                                                       |
| Reporting                              |                                |                                                                                                                                          |                                                                                                                                          |
| 29.                                    | Quotations presented           | Were participant quotations presented to illustrate the themes / findings? Was each quotation identified? e.g. <i>participant number</i> | Yes, however, for ethical reasons and to protect participant confidentiality quotes were presented as descriptions, rather               |

| No  | Item                         | Guide questions/description                                            |                                                                                                                                         |
|-----|------------------------------|------------------------------------------------------------------------|-----------------------------------------------------------------------------------------------------------------------------------------|
|     |                              |                                                                        | than quotes literally extracted from the online forum. Participants were only identified by a unique number. <b>Pg. 6</b>               |
| 30. | Data and findings consistent | Was there consistency between the data presented and the findings?     | Yes<br><b>Pg. 7-21</b>                                                                                                                  |
| 31. | Clarity of major themes      | Were major themes clearly presented in the findings?                   | Yes<br><b>Pg. 7-21</b>                                                                                                                  |
| 32. | Clarity of minor themes      | Is there a description of diverse cases or discussion of minor themes? | Yes. Key themes and sub-themes are reported. Restrictions on word count prevented themes being discussed extensively<br><b>Pg. 7-21</b> |

# BMJ Open

## Barriers and facilitators to adherence to secondary stroke prevention medications after stroke: Analysis of survivors' and caregivers' views from an online stroke forum

|                                 |                                                                                                                                                                                                                                                                                                                               |
|---------------------------------|-------------------------------------------------------------------------------------------------------------------------------------------------------------------------------------------------------------------------------------------------------------------------------------------------------------------------------|
| Journal:                        | <i>BMJ Open</i>                                                                                                                                                                                                                                                                                                               |
| Manuscript ID                   | bmjopen-2017-016814.R1                                                                                                                                                                                                                                                                                                        |
| Article Type:                   | Research                                                                                                                                                                                                                                                                                                                      |
| Date Submitted by the Author:   | 17-May-2017                                                                                                                                                                                                                                                                                                                   |
| Complete List of Authors:       | JAMISON, JAMES; UNIVERSITY OF CAMBRIDGE, Public Health and Primary Care<br>Sutton, Stephen; University of Cambridge, Public health and Primary Care<br>Mant, Jonathan; University of Cambridge, Public Health and Primary Care<br>De Simoni, Anna; Queen Mary University of London, Centre for Primary Care and Public Health |
| <b>Primary Subject Heading</b>: | Cardiovascular medicine                                                                                                                                                                                                                                                                                                       |
| Secondary Subject Heading:      | Qualitative research                                                                                                                                                                                                                                                                                                          |
| Keywords:                       | STROKE MEDICINE, Caregiver, Medication adherence, Online forum                                                                                                                                                                                                                                                                |
|                                 |                                                                                                                                                                                                                                                                                                                               |

SCHOLARONE™  
Manuscripts

1  
2  
3 **1 Barriers and facilitators to adherence to secondary stroke**  
4  
5  
6 **2 prevention medications after stroke: Analysis of survivors’**  
7  
8  
9  
10 **3 and caregivers’ views from an online stroke forum**  
11  
12

13  
14  
15 \*James Jamison<sup>1</sup>

16  
17  
18 Stephen Sutton<sup>1</sup>

19  
20  
21 Jonathan Mant<sup>1</sup>

22  
23  
24 Anna De Simoni<sup>2</sup>  
25  
26  
27  
28

29  
30  
31 <sup>1</sup>Primary Care Unit, Department of Public Health & Primary Care, Forvie Site, University of Cambridge  
32  
33 School of Clinical Medicine, Box 113 Cambridge Biomedical Campus, Cambridge, CB2 0SR.

34  
35  
36 <sup>2</sup>Centre for Primary Care and Public Health, Barts and the London School of Medicine and Dentistry, Queen  
37  
38 Mary University of London, London, E1 2AB

39  
40  
41 \*corresponding author: James Jamison; Tel: +44 (0)1223 768272. Fax: +44 (0)1223 763492. Email:

42  
43  
44  
45  
46  
47  
48  
49  
50  
51  
52  
53  
54  
55  
56  
57  
58  
59  
60  
61  
62  
63  
64  
65  
66  
67  
68  
69  
70  
71  
72  
73  
74  
75  
76  
77  
78  
79  
80  
81  
82  
83  
84  
85  
86  
87  
88  
89  
90  
91  
92  
93  
94  
95  
96  
97  
98  
99  
100  
101  
102  
103  
104  
105  
106  
107  
108  
109  
110  
111  
112  
113  
114  
115  
116  
117  
118  
119  
120  
121  
122  
123  
124  
125  
126  
127  
128  
129  
130  
131  
132  
133  
134  
135  
136  
137  
138  
139  
140  
141  
142  
143  
144  
145  
146  
147  
148  
149  
150  
151  
152  
153  
154  
155  
156  
157  
158  
159  
160  
161  
162  
163  
164  
165  
166  
167  
168  
169  
170  
171  
172  
173  
174  
175  
176  
177  
178  
179  
180  
181  
182  
183  
184  
185  
186  
187  
188  
189  
190  
191  
192  
193  
194  
195  
196  
197  
198  
199  
200  
201  
202  
203  
204  
205  
206  
207  
208  
209  
210  
211  
212  
213  
214  
215  
216  
217  
218  
219  
220  
221  
222  
223  
224  
225  
226  
227  
228  
229  
230  
231  
232  
233  
234  
235  
236  
237  
238  
239  
240  
241  
242  
243  
244  
245  
246  
247  
248  
249  
250  
251  
252  
253  
254  
255  
256  
257  
258  
259  
260  
261  
262  
263  
264  
265  
266  
267  
268  
269  
270  
271  
272  
273  
274  
275  
276  
277  
278  
279  
280  
281  
282  
283  
284  
285  
286  
287  
288  
289  
290  
291  
292  
293  
294  
295  
296  
297  
298  
299  
300  
301  
302  
303  
304  
305  
306  
307  
308  
309  
310  
311  
312  
313  
314  
315  
316  
317  
318  
319  
320  
321  
322  
323  
324  
325  
326  
327  
328  
329  
330  
331  
332  
333  
334  
335  
336  
337  
338  
339  
340  
341  
342  
343  
344  
345  
346  
347  
348  
349  
350  
351  
352  
353  
354  
355  
356  
357  
358  
359  
360  
361  
362  
363  
364  
365  
366  
367  
368  
369  
370  
371  
372  
373  
374  
375  
376  
377  
378  
379  
380  
381  
382  
383  
384  
385  
386  
387  
388  
389  
390  
391  
392  
393  
394  
395  
396  
397  
398  
399  
400  
401  
402  
403  
404  
405  
406  
407  
408  
409  
410  
411  
412  
413  
414  
415  
416  
417  
418  
419  
420  
421  
422  
423  
424  
425  
426  
427  
428  
429  
430  
431  
432  
433  
434  
435  
436  
437  
438  
439  
440  
441  
442  
443  
444  
445  
446  
447  
448  
449  
450  
451  
452  
453  
454  
455  
456  
457  
458  
459  
460  
461  
462  
463  
464  
465  
466  
467  
468  
469  
470  
471  
472  
473  
474  
475  
476  
477  
478  
479  
480  
481  
482  
483  
484  
485  
486  
487  
488  
489  
490  
491  
492  
493  
494  
495  
496  
497  
498  
499  
500  
501  
502  
503  
504  
505  
506  
507  
508  
509  
510  
511  
512  
513  
514  
515  
516  
517  
518  
519  
520  
521  
522  
523  
524  
525  
526  
527  
528  
529  
530  
531  
532  
533  
534  
535  
536  
537  
538  
539  
540  
541  
542  
543  
544  
545  
546  
547  
548  
549  
550  
551  
552  
553  
554  
555  
556  
557  
558  
559  
560  
561  
562  
563  
564  
565  
566  
567  
568  
569  
570  
571  
572  
573  
574  
575  
576  
577  
578  
579  
580  
581  
582  
583  
584  
585  
586  
587  
588  
589  
590  
591  
592  
593  
594  
595  
596  
597  
598  
599  
600  
601  
602  
603  
604  
605  
606  
607  
608  
609  
610  
611  
612  
613  
614  
615  
616  
617  
618  
619  
620  
621  
622  
623  
624  
625  
626  
627  
628  
629  
630  
631  
632  
633  
634  
635  
636  
637  
638  
639  
640  
641  
642  
643  
644  
645  
646  
647  
648  
649  
650  
651  
652  
653  
654  
655  
656  
657  
658  
659  
660  
661  
662  
663  
664  
665  
666  
667  
668  
669  
670  
671  
672  
673  
674  
675  
676  
677  
678  
679  
680  
681  
682  
683  
684  
685  
686  
687  
688  
689  
690  
691  
692  
693  
694  
695  
696  
697  
698  
699  
700  
701  
702  
703  
704  
705  
706  
707  
708  
709  
710  
711  
712  
713  
714  
715  
716  
717  
718  
719  
720  
721  
722  
723  
724  
725  
726  
727  
728  
729  
730  
731  
732  
733  
734  
735  
736  
737  
738  
739  
740  
741  
742  
743  
744  
745  
746  
747  
748  
749  
750  
751  
752  
753  
754  
755  
756  
757  
758  
759  
760  
761  
762  
763  
764  
765  
766  
767  
768  
769  
770  
771  
772  
773  
774  
775  
776  
777  
778  
779  
780  
781  
782  
783  
784  
785  
786  
787  
788  
789  
790  
791  
792  
793  
794  
795  
796  
797  
798  
799  
800  
801  
802  
803  
804  
805  
806  
807  
808  
809  
810  
811  
812  
813  
814  
815  
816  
817  
818  
819  
820  
821  
822  
823  
824  
825  
826  
827  
828  
829  
830  
831  
832  
833  
834  
835  
836  
837  
838  
839  
840  
841  
842  
843  
844  
845  
846  
847  
848  
849  
850  
851  
852  
853  
854  
855  
856  
857  
858  
859  
860  
861  
862  
863  
864  
865  
866  
867  
868  
869  
870  
871  
872  
873  
874  
875  
876  
877  
878  
879  
880  
881  
882  
883  
884  
885  
886  
887  
888  
889  
890  
891  
892  
893  
894  
895  
896  
897  
898  
899  
900  
901  
902  
903  
904  
905  
906  
907  
908  
909  
910  
911  
912  
913  
914  
915  
916  
917  
918  
919  
920  
921  
922  
923  
924  
925  
926  
927  
928  
929  
930  
931  
932  
933  
934  
935  
936  
937  
938  
939  
940  
941  
942  
943  
944  
945  
946  
947  
948  
949  
950  
951  
952  
953  
954  
955  
956  
957  
958  
959  
960  
961  
962  
963  
964  
965  
966  
967  
968  
969  
970  
971  
972  
973  
974  
975  
976  
977  
978  
979  
980  
981  
982  
983  
984  
985  
986  
987  
988  
989  
990  
991  
992  
993  
994  
995  
996  
997  
998  
999  
1000

**ABSTRACT**28  
29 Objective

30 To identify barriers and facilitators of medication adherence in patients with stroke along with their  
31 caregivers.

## 32 Design

33 Qualitative thematic analysis of posts about secondary prevention medications, informed by Perceptions and  
34 Practicalities Approach.

## 35 Setting

36 Posts written by UK stroke survivors and their family members taking part in the online forum of the Stroke  
37 Association, between 2004 and 2011.

## 38 Participants

39 84 participants: 49 stroke survivors, 33 caregivers, 2 not stated, identified using the keywords 'taking  
40 medication', 'pills', 'size', 'side-effects', 'routine', 'blister' as well as secondary prevention medication terms.

## 41 Results

42 Perceptions reducing the motivation to adhere included dealing with medication side effects, questioning  
43 doctors' prescribing practices, and negative publicity about medications, especially in regard to statins.

44 Caregivers faced difficulties with ensuring medications were taken while respecting the patient's decisions not  
45 to take tablets. They struggled in their role as advocates of patient's needs with healthcare professionals. Not  
46 experiencing side effects, attributing importance to medications, positive personal experiences of taking  
47 tablets and obtaining modification of treatment to manage side effects were facilitators of adherence. Key  
48 practical barriers included difficulties with swallowing tablets, dealing with the burden of treatment and drug  
49 cost. Using medication storage devices, following routines and getting help with medications from caregivers  
50 were important facilitators of adherence.

## 51 Conclusions

52 An online stroke forum is a novel and valuable resource to investigate use of secondary prevention  
53 medications. Analysis of this forum highlighted significant barriers and facilitators of medication adherence  
54 faced by stroke survivors and their caregivers. Addressing perceptual and practical barriers highlighted here



1  
2  
3 55 can inform the development of future interventions aimed at improving adherence to secondary prevention  
4  
5 56 medication after stroke.

6  
7 57 Abstract word count- 268

8 58  
9 59 Keywords: stroke, caregiver, medication adherence, online forum  
10 60

11 61

12  
13 62 Article summary

14  
15 63 Strengths and Limitations

- 16  
17 64 • The first study to explore and identify perceived barriers and facilitators to medication adherence  
18 65 among users of an online stroke forum using a theoretical framework.  
19  
20 66 • Inclusion of caregivers offers a unique perspective for understanding of medication taking behavior in  
21 67 patients with severe disabilities.  
22  
23 68 • The online forum allowed patients and caregivers to communicate in a comfortable environment  
24 69 beyond the influence of the research team, shedding new light on factors affecting adherence to  
25 70 secondary prevention medications.  
26  
27 71 • Key themes identified may be limited by the search terms used and may not provide an exhaustive list  
28 72 of all barriers and facilitators to adherence discussed in the forum.  
29  
30 73 • Posts were scrutinized by a moderator prior to being published.  
31  
32 74 • The online forum was dated 2004-2011 and might not reflect current practice.  
33  
34  
35  
36  
37  
38  
39  
40  
41

42 76 Funding: ADS is funded by a NIHR Academic Clinical Lectureship. The views expressed are those of the  
43 77 author(s) and not necessarily those of the NHS, the NIHR or the Department of Health. James Jamison was  
44 78 supported by a research grant from The Stroke Association and the British Heart Foundation: TSA  
45  
46  
47  
48 79 BHF 2011/01  
49

50  
51 80  
52 81  
53 82 Data sharing statement: No additional data available.  
54

55  
56 83  
57  
58  
59  
60

## INTRODUCTION

Stroke recurrences are associated with higher disability and mortality than first time strokes,<sup>1</sup> and account for one third of all stroke events.<sup>2</sup> Secondary prevention medicines are considered important in reducing stroke recurrences in patient who have already experienced a stroke or transient ischaemic attack.<sup>3,4</sup> However medication non-adherence is an issue known to be problematic, contributing to suboptimal health outcomes.<sup>5</sup> Reported practical barriers to medication adherence after stroke include forgetting medication, difficulty swallowing tablets and difficulties handling packaged medications.<sup>6</sup> A key factor decreasing patients' motivation for taking secondary prevention medications is having concerns about tablets, such as becoming dependent on them or worrying about their long term effects.<sup>7</sup> Difficulties with taking medication, lack of information on stroke and medications and patient's fears of medicines are important barriers, while support from caregivers and worrying about further stroke are facilitators.<sup>8</sup>

Severe stroke related impairments make it difficult for survivors to participate in research. Perhaps for this reason there is little evidence available on factors affecting adherence to medications in patients with more disabling strokes (at least a third of stroke survivors).<sup>9,10</sup> Studying factors affecting adherence can be difficult because of self-presentational bias, i.e. patients may perceive that a certain behaviour, e.g. adherence to treatment, is one of the duties expected of the 'good patient' and may be reluctant to admit a different behaviour, or reactivity bias, i.e. if patients are aware that their adherence is being monitored, this might increase adherence simply by drawing attention to it.<sup>11</sup> In a recent investigation, De Simoni and colleagues used an online forum to explore adherence to inhaler treatment in asthma adolescents according to a framework, gaining fresh insights on factors affecting adherence in this patients' group.<sup>12</sup>

Our analysis differs from previous adherence literature by assessing survivors and caregivers attitudes to medication adherence from a viewpoint that has not been previously explored. The online forum offers users the opportunity to discuss issues around medication that may be considered sensitive and which they may be less willing to address through traditional face to face approaches.

Caregivers of elderly patients experience difficulties with tablet administration.<sup>13</sup> As patients' dependency on caregivers for medicine taking increases, caregivers' factors also become relevant in determining patients'

1  
2  
3 112 adherence.<sup>10</sup> Indeed, a recent interview study by the authors<sup>14</sup> highlighted the importance of caregivers in  
4  
5 113 adherence to secondary prevention medications. Findings from another study suggest that among patients with  
6  
7 114 cardiovascular disease, those with a caregiver were more likely to be adherent to medications.<sup>15</sup> There is a  
8  
9 115 need to investigate adherence to secondary prevention medications after stroke avoiding self- presentational  
10  
11 116 and reactivity biases, including patients' with severe disabilities and caregivers' factors.<sup>10</sup> Online health  
12  
13 117 forums are accessible 24/7 in the form of asynchronous communication that is convenient to the user. This  
14  
15 118 medium offers anonymity and encourages honesty. Individuals with health-related difficulties can  
16  
17 119 communicate in confidence about what matters to them.<sup>11</sup> TalkStroke is an online forum where survivors and  
18  
19 120 their families discuss information and provide support to one another. Recent investigations using this forum  
20  
21 121 showed that a wide variety of themes were discussed online, including secondary prevention medications.<sup>16</sup>  
22  
23 122 <sup>17</sup>Caregiver views were well represented and most of them (70%) looked after patients with severe disabilities.  
24  
25 123 Among forum users who were stroke survivors, 30% were suffering from severe impairments.<sup>16</sup> Therefore  
26  
27 124 data from the archives of this forum have the potential to shed light on adherence issues for these hard to  
28  
29 125 reach groups.<sup>18 17</sup>  
30  
31  
32 126 The aim of this investigation was to understand barriers and facilitators of medication adherence among  
33  
34 127 survivors of stroke and their caregivers through evaluating posts written in an online stroke forum, using a  
35  
36 128 framework based approach.

## 129 130 **METHODS**

### 131 132 **Design**

133 We undertook a qualitative analysis of posts to the TalkStroke online forum using the PAPA (Perceptions And  
134 Practicalities Approach) theoretical framework.<sup>19</sup> According to the framework, nonadherence is viewed as a  
135 variable that can change over time and treatments. Nonadherence is known to be intentional or unintentional.  
136 Unintentional adherence is linked to practical factors and resource limitation, e.g. forgetting to take  
137 medications because of lack of prompting or experiencing difficulties with swallowing tablets. Perceptual  
138 factors or beliefs affect intentional adherence, i.e. how patients consciously make decisions that influence their

1  
2  
3 139 medication taking behaviour.<sup>20</sup> This occurs when patients deliberately choose not to follow recommendations  
4  
5 140 and where beliefs about medications influence motivation to start and continue treatment. The PAPA  
6  
7 141 framework was chosen as it is specifically designed to identify and classify factors affecting adherence to  
8  
9 142 medications. Results have the potential to inform the development of behavioural interventions aimed at  
10  
11 143 improving adherence and their subsequent evaluation according to causal pathways. The framework posits  
12  
13 144 that patients make a choice to take medication based upon judgement of their personal need for the  
14  
15 145 medication, relative to their concerns about the possible consequences of taking it.<sup>19</sup> The PAPA approach  
16  
17 146 seeks to understand adherence through addressing both perceptual (beliefs and preferences) and practical  
18  
19 147 (capability and resources) factors which have an influence on patients commencing and continuing treatment.  
20  
21 148 We searched the forum archives using a set of pre-defined keywords, in order to identify barriers and  
22  
23 149 facilitators of adherence to secondary prevention medications. Posts were written by stroke survivors or  
24  
25 150 family members/caregivers.

## 27 28 151 **Setting**

29  
30  
31 152 The analysis was performed on the archives from TalkStroke, a UK based online forum hosted by the Stroke  
32  
33 153 Association website, including 22,173 posts written between 2004 and 2011 by 2,583 unique usernames.<sup>16</sup>  
34  
35 154 Talkstroke was an online resource through which stroke survivors and caregivers could seek and/or offer  
36  
37 155 information and support. Forum users could discuss any topics, develop their own conversation threads and  
38  
39 156 there was no restriction on the subject discussed. Participants could read the subject of the thread being  
40  
41 157 discussed and decide whether they wished to contribute. Differentiating survivors and caregivers was done by  
42  
43 158 reading the text of the post: survivors talked in first person about themselves, while caregivers were talking  
44  
45 159 about a stroke survivor in the third person, e.g. 'my father had a stroke'. Stroke survivors with severe  
46  
47 160 disabilities were amongst the users of the forum. Caregivers could register as users independently from  
48  
49 161 patients. 60% of users were in fact caregivers.<sup>16</sup> We acknowledge that some caregivers could have assisted  
50  
51 162 patients in writing their posts, though we do not have data to quantify these occurrences.

52  
53  
54 163

55  
56  
57 164

## 165 **Procedure and participants**

166 A word list of unique terms of the archive file of Talkstroke was generated using AntConc3.2.4.<sup>21</sup> Terms  
167 related to secondary prevention medications were selected (e.g. Amlodipine, statin, warfarin, ramipril),  
168 including misspellings (e.g. Aspirin, simvastin), brand names (e.g. Lipitor, Plavix) and drug categories (e.g.  
169 statin, diuretics, blood pressure medicines etc.). Posts including any secondary prevention medication term  
170 were identified. We additionally searched the Talkstroke archive for the keywords: ‘taking medication’,  
171 ‘pills’, ‘size’, ‘statins’, ‘side effects’, ‘capsule’, ‘box’, ‘routine’, ‘blister’, and ‘secondary prevention’. These  
172 keywords were lay terms used by patients with stroke and their caregivers when talking about adherence to  
173 secondary prevention medications as emerged from the transcripts of a previous interview study by the  
174 authors<sup>14</sup>. The aim of the interviews was exploring stroke survivors’ and caregivers’ views around barriers  
175 and facilitators of adherence to secondary prevention medications in general practice. Search terms were  
176 discussed and agreed by two authors (JJ and ADS, see online supplementary file 1).

177 Participants of the online forum included stroke survivors and patients talked about by caregivers, identified  
178 by usernames linked to each of the selected posts. Characteristics were retrieved from usernames, taking  
179 advantage of data from a previous study.<sup>16</sup> Demographics are shown in table 1. All posts that were relevant  
180 for the research questions were copied and pasted into Microsoft Excel and NVivo 10 for later analysis.

## 181 **Ethics**

182 The Stroke Association gave permission to ADS to use the data for research purposes. To protect the identity  
183 and intellectual property of forum participants,<sup>22</sup> we chose not to use *verbatim* quotes, despite this being  
184 normal practice in qualitative research. Instead, we used descriptions of quotes throughout the text.<sup>16 18</sup>  
185 Paraphrasing of the text reflected as closely as possible the original posts and was agreed amongst authors to  
186 minimise interpretation bias. The ethical aspects of conducting research on this forum have been discussed  
187 more extensively elsewhere.<sup>16</sup>

## 189 **Data Analysis**

1  
2  
3 190 A qualitative approach using thematic analysis was undertaken to explore forum posts.<sup>23</sup> All posts retrieved  
4  
5 191 through the search terms were read by JJ to aid familiarization. To strengthen the validity of findings and  
6  
7 192 ensure rigour, 50% of all posts were double-coded by ADS. Throughout the process the authors checked the  
8  
9 193 coding structure obtained to ensure a high level of agreement in coding was maintained. Once completed,  
10  
11 194 coding were compared and the intercoder reliability was measured. The kappa score was 80%. Queries  
12  
13 195 arising from the coding process were resolved through discussions involving a third author (SS) where  
14  
15 196 necessary, until a final consensus was reached. Nvivo 10 was used to manage and organise the data. A set of  
16  
17 197 codes representing key themes were initially developed from the forum posts by JJ, to represent barriers and  
18  
19 198 facilitators of medication adherence. These themes were refined, and sub-themes were identified and grouped  
20  
21 199 together with similar concepts. A coding framework was formed and refined further as additional themes  
22  
23 200 emerged. Data saturation was reached with the recruitment of 84 individuals, beyond which no new themes  
24  
25 201 emerged. Guided by the PAPA framework, we coded forum posts to identify practical and perceptual factors  
26  
27 202 affecting adherence to medications. Identified themes were mapped onto the theory and sub-divided into  
28  
29 203 barriers or facilitators of adherence.

30  
31  
32 204 While we were unable to ask questions to clarify themes, users could participate in forum discussions they  
33  
34 205 were interested in, offering insights on barriers and facilitators to adherence that may be beyond the reach of  
35  
36 206 interviews. A previous investigation comparing an online forum with qualitative interviews concluded that the  
37  
38 207 forum could provide useful data for qualitative health research.<sup>24</sup>

39  
40  
41 208 Although there is evidence that inappropriate medical information or health behaviours in this online  
42  
43 209 stroke forum were identified and corrected by participants in subsequent postings,<sup>16</sup> consistent with what is  
44  
45 210 reported elsewhere in a cancer patients' internet support group,<sup>25</sup> threads of discussions were not analysed  
46  
47 211 here. Therefore self-correction received through the forum is not reported. For the purpose of this study, the  
48  
49 212 term caregiver refers to family members such as spouses or children, and is not associated with paid  
50  
51 213 caregivers. Online supplementary file 1 shows the analysis pathway to reach the final number of themes.

52  
53  
54 214

55  
56  
57 215

**RESULTS****217 Identification of posts**

218 A search of the stroke forum resulted in 19,214 posts not associated with medication taking being excluded,  
219 leaving 2959 posts (see online supplementary file 1). Additional analysis excluded 2527 posts not about  
220 secondary prevention medications. Of the 473 remaining posts, a further 251 were removed as being duplicate  
221 or not directly associated with medication adherence. This yielded a total of 222 posts describing barriers/  
222 facilitators of adherence to secondary prevention medication, including 162 posts by stroke survivors, 57 by  
223 caregivers and 3 by an individual whose status as a survivor or caregiver could not be identified.

**224 Characteristics of study participants**

225 From 222 posts related to adherence to secondary prevention medications we identified 84 individuals.  
226 Approximately 60% of participants were stroke survivors posting about their own experiences with the  
227 remainder being caregivers, predominantly sons or daughters. The age of participants ranged from 32yrs to 91  
228 yrs, male and female were similarly represented (n=40 vs n=38, see table 1). The majority of participants  
229 experienced a stroke within 12 months of posting on the forum. Around three quarters of participants (73%)  
230 reported a stroke occurring within the last 5 years, with 44% having had a stroke within the previous 12  
231 months. The mean number of years since stroke was 2 yrs 2 months for survivors and 10 months for patients  
232 talked about by caregivers. Several participants were prolific users on the forum and were instrumental in  
233 facilitating discussions and providing feedback on a considerable number of topics, offering a rich and in  
234 depth assessment of issues raised. One forum participant wrote 37 posts about secondary prevention  
235 medications, while another 15 posts. The majority of participants (n = 44) posted only once, 19 participants  
236 twice and 6 three times. Sample characteristics are reported in table 1.

237 Table 1 about here

238

**239 Themes**

240

1  
2  
3 241 The range of themes comprising barriers and facilitators of medication adherence are reported in Table 2. In  
4  
5 242 line with the PAPA approach<sup>19</sup> these are discussed according to the following two categories.

6  
7 243

8  
9  
10 244 Table 2 about here

11  
12  
13 245 **Perceptions- Necessity Beliefs and Concerns:** In this section perceptual barriers and facilitators of  
14  
15 246 medication adherence in stroke survivors and caregivers are explored, according to their classifications as  
16  
17 247 necessity beliefs i.e. doubts about personal need for medication to maintain or improve current and future  
18  
19 248 health, and their concerns about secondary prevention treatment.

20  
21  
22 249 **Practicalities- Capability and Resources:** In this section we explore barriers and facilitators that stroke  
23  
24 250 survivors and caregivers face around their capability of taking/giving medication and the resources available  
25  
26 251 to undertake such behaviour.

27  
28 252 Within each category themes are grouped into barriers and facilitators. For each of the emerging themes, when  
29  
30 253 relevant, caregivers' views have been reported after patients' ones.

31  
32  
33 254 **Perceptions of secondary prevention medications**

34  
35  
36 255 **Necessity beliefs and concerns**

37  
38 256 **Treatment Necessity**

39  
40 257 **Lack of perceived benefits of medications**

41  
42  
43 258

44  
45 259 **Doubts about high cholesterol as risk factor for stroke**

46  
47 260 A few users expressed doubts about the role of cholesterol in stroke, questioning the need for taking any  
48  
49 261 preventative medications at all.

50  
51  
52 262

53  
54 263 *A male survivor acknowledged statins controlled cholesterol, but believed strokes occurred regardless*  
55  
56 264 *of cholesterol levels. He talked about the 'Cholesterol Myth' having researched the topic online and*



265

described feeling confused about taking statins when in reality they weren't needed. [Male, age 67,

age at stroke 55, N.70]

268

### 269 **Doubts about the added benefit of statins**

270 Doubts were also expressed about the benefits statin added to long term health outcomes

271 *A female survivor read about the hype around statins and stated she still didn't have confidence in*

272 *them. She had read a research paper on statins suggesting they only added an extra 9 months of*

273 *life. [Female, age 56, age at stroke 56, N.66]*

### 274 Caregivers' related views

### 275 **Respecting patient's medication choice**

276 Caregivers struggled with their role of ensuring patients' adherence. They felt survivors' decisions about

277 choosing or refusing medications needed to be evaluated according to patients' preferences and not just in

278 terms of what was clinically right.

279 *A caregiver recognized it was hard to encourage her father to take medications. He suffered many*

280 *side effects which made him feel less in control so he would choose to go without tablets. She said it*

281 *was important to have a balance regarding what the survivor wanted, considering he stated he would*

282 *be happier if he felt he was in control. See concluded that patient's choice had to be respected, even if*

283 *she didn't agree. [Male, age unknown, age at stroke unknown, N.46]*

284

### 285 **Awareness of stroke recurrences despite medications**

286 The fact that survivors could suffer a further stroke despite taking secondary prevention medications and

287 following a healthy lifestyle also raised concerns around the benefits of adherence to medications.

288 *A caregiver described how after having a first stroke, her father changed his lifestyle completely by*

289 *eating well, exercising more and taking medication to control his blood pressure. However one day*

1  
2  
3 290 *his BP surged suddenly and he experienced a second stroke. [Male, age unknown, time since stroke 0*  
4  
5 291 *yrs, N.55]*

### 7 292 **Attributing importance to medications**

8  
9 293

#### 10 294 **Secondary prevention medications are essential to prevent stroke recurrences**

11  
12 295 The importance of secondary prevention medication in reducing the risk of a stroke event was acknowledged  
13  
14 296 by forum users. Prioritising secondary prevention tablets over other types of medications highlighted the  
15  
16 297 significance survivors attached to adherence to these medications. These posts were often written in reply to  
17  
18 298 users complaining of medication side effects.

19  
20  
21 299 *A female survivor commented that it was better to take a few extra tablets from the GP than to*  
22  
23 300 *experience another stroke. Tablets were provided to prevent a further stroke, and she stressed that*  
24  
25 301 *they shouldn't be stopped except on professional advice [Female, age 51, age at stroke 51, N.17]*

26  
27 302

#### 28 29 303 **Secondary prevention medications offer reassurance**

30  
31 304 Another survivor reported feeling reassured by medications, particularly warfarin.

32  
33 305 *A female survivor mentioned that although she had suffered 2 strokes in the previous year, none had*  
34  
35 306 *occurred since commencing warfarin. She felt reassured about taking warfarin and she was now*  
36  
37 307 *worried about coming off the medication as she had already experienced flashing in her left eye since*  
38  
39 308 *she had started to be weaned off the drug [Survivor, female, age 42, age at stroke 42, N.35]*

40  
41 309

#### 42 43 310 **Experiencing the consequences of non-adherence improves adherence**

44  
45 311 Experiencing the consequences of medication nonadherence after having another stroke reinforced necessity  
46  
47 312 beliefs about secondary prevention medications.

48  
49  
50  
51 313 *A survivor who had already suffered 2 strokes acknowledged it was impossible to ever fully recover*  
52  
53 314 *from the stroke experience. He said after his first stroke he was prescribed tablets he didn't take and*

54  
55  
56  
57  
58  
59  
60

1  
2  
3 315 *after suffering the second stroke he realised this was a big mistake. [Male, age 67, age at stroke 55,*

4  
5 316 *N.82]*

6  
7  
8 317 *A survivor refused statins after her first stroke because of side effects. However, after suffering a*

9  
10 318 *second one she was now worried enough to take them. [Survivor, female, age 68, age at stroke 67,*

11  
12 319 *N.14]*

13  
14 320 Cargivers' related views

15  
16 321 **Not taking secondary prevention medications is risky**

17  
18 322 Caregivers generally held strong beliefs about the need for secondary prevention medications.

19  
20 323 *A caregiver (husband) advised that if patients don't take medications they're likely to become worse.*

21  
22 324 *He was amazed about how many people choose not to take their tablets, perhaps half of them, and few*

23  
24 325 *even did so when they knew they had a meeting with the consultant in the coming weeks. [Female, age*

25  
26 326 *46, age at stroke 46, N.12]*

27  
28  
29 327 *A caregiver (daughter) mentioned that her father wasn't taking medication routinely. He had had a*

30  
31 328 *massive stroke just a few weeks earlier. She wanted to say to forum users that if stroke survivors*

32  
33 329 *follow a healthy lifestyle and are strict with medications, then there is no reason why a major stroke*

34  
35 330 *could not be prevented. [Male, age 55, age at stroke 55, N.6]*

36  
37 331

38  
39 332 **Concerns**

40 333

41 334

### Management of medication side effects

42  
43 335 **Suffering from side effects contributes to suboptimal adherence**

44  
45  
46 336 The experience of side effects led some users to intentionally alter adherence to the medications. This was

47  
48 337 done by 'making a compromise' with health professionals.

49  
50 338 *A male survivor described being suspicious of the number and variety of pills he was dispensed. He*

51  
52 339 *said that he had come to a compromise with his doctor about taking blood pressure tablets. He was*

53  
54 340 *on 2 tablets for blood pressure, of which one was a diuretic. Having got fed up of frequently running*

1  
2  
3 341 *to the toilet, he decided to check his blood pressure every day and would skip the diuretic if blood*  
4  
5 342 *pressure was fine [Male, age unknown, age at stroke unknown, N.63]*  
6  
7

### 8 343 **Lifestyle changes versus taking secondary prevention medications**

9  
10 344 To avoid side effects, some stroke survivors took the decision to reduce cholesterol through changing diet,  
11  
12 345 rather than medications, without mentioning whether this decision was taken with or communicated to  
13  
14 346 healthcare professionals. However reducing cholesterol through diet rather than medication was recommended  
15  
16 347 by the GP also.  
17  
18

19 348

20  
21  
22 349 *A female survivor decided to reduce her cholesterol through diet because of unpleasant side effects of*  
23  
24 350 *statins. Once symptoms disappeared, she wouldn't take the statins, but instead olive oil and a healthy*  
25  
26 351 *diet to keep her cholesterol balanced naturally. She said she would continue aspirin as it didn't seem*  
27  
28 352 *to cause side effects [Female, age 52, age at stroke 52, N.76]*  
29

30 353

31  
32 354 *A female survivor mentioned her cholesterol level was average. Her nurse suggested starting*  
33  
34 355 *medication but her GP was against this, saying the level could be reduced through diet and exercise*  
35  
36 356 *alone as these tablets were over prescribed. She added that statins were recommended when needed*  
37  
38 357 *because of genetic makeup [meaning familial hypercholesterolemia]. [Female, age 49, age at stroke*  
39  
40 358 *48, N.21].*  
41

42 359 Depending on the exact clinical scenario, the decisions about statins in the last two posts could be medically  
43  
44 360 appropriate or not, i.e. act both as barrier or facilitator to adherence to secondary prevention medications. Due  
45  
46 361 to lack of details, no definite classification could be made. To reflect this, themes were reported under both  
47  
48 362 headings in Table 2, but reported only here within the results, for simplicity.  
49

### 50 363 Caregivers' related views

### 51 364 **Caregiver difficulties as advocates of stroke survivors with healthcare professionals**

1  
2  
3 365 Caregivers assumed at times the role of advocates for their family members suffering from the side effects of  
4  
5 366 medication and reported struggling in this role. Failure to be successful in obtaining a change in treatment led  
6  
7 367 some survivors to stop taking medication completely.

8  
9  
10 368 *A female caregiver described consistently trying to have her husband's 40mg statin dosage reduced*  
11  
12 369 *by his GP. As a result of the high dosage he was chronically tired, so he stopped taking statins. [Male,*  
13  
14 370 *age 54, age at stroke 52, N.68]*

15 371

16 372

17 373

### Impact of bad press on statin

18 374

19 375

20 376

#### **Influence of side effects on taking medicines**

21 377

22 378

Side effects of secondary prevention medications raised important concern, and statins were frequently

23 379

discussed by forum users. The bad press about statins was mentioned in relation to starting the medication and

24 380

ongoing adherence. Participants discussed these concerns together with health care professionals.

25 381

*A survivor wrote that despite her GP's recommendation she couldn't commence statins after reading*

26 382

*in the press about side effects. She said she felt well and didn't want to jeopardise that, as she wasn't*

27 383

*convinced she needed them. Although also her consultant disagreed with her decision and was keen*

28 384

*for her to take them, he said she didn't necessarily have to take them. [Female, age 54, age at stroke*

29 385

*54, N.37]*

30 386

#### Caregivers' related views

31 387

#### **Bad press making harder for caregivers to encourage adherence**

32 388

Reading information about statins and their side effects highlighted caregivers' struggle and made it more

33 389

difficult for them to help stroke survivors be adherent.

34 390

*A caregiver's mother had suffered 2 mini strokes and was now prescribed both aspirin as well as pills*

35 391

*to lower cholesterol but was refusing to take these as she had read in the press about the bad side*

36 392

*effects they caused [Female, age unknown, age at stroke unknown, N.74]*

1  
2  
3 3934  
5 394

## Questioning prescribing practices

6  
7 395

### Problems with obtaining appropriate secondary prevention medication treatment

8  
9 396  
10  
11 397 Disappointment was expressed when practitioners failed to start/change secondary prevention medications12  
13 398 when the survivor judged their current treatment to be inadequate.14  
15 39916  
17 400 *A survivor described feeling let down as he requested changes in medications because he didn't feel*18  
19 401 *they [aspirin and clopidogrel] were beneficial. He'd lost confidence in the health care system after*20  
21 402 *visiting several consultants and being sent home with unchanged medications. [Male, age 43, age at*22  
23 403 *stroke 41, N.20]*24  
25 404

### Concerns around incorrect prescribing

26  
27 405  
28  
29 406 This was also apparent when the prescribed medication was perceived as being incorrect.30  
31 40732  
33 408 *A stroke survivor recalled being on 75mg of aspirin as well as beta blockers, however, his nephew*34  
35 409 *who was a consultant surgeon, suggested that had he been taking warfarin instead of the aspirin he*36  
37 410 *may not have suffered a second stroke [Male, age 67, age at stroke 55, N.82]*38  
39 411

### Inconsistent advice about medications prescribed

40  
41 412  
42  
43 413 Receiving conflicting advice on medication practices caused further uncertainty and confusion, which might44  
45 414 have indirectly affected adherence to secondary prevention medications.46  
47 415 *A survivor suffered increased bleeding while on warfarin was taken off it. He suffered another stroke*48  
49 416 *shortly after, and was put back on warfarin for the bleeding to begin again. He felt confused at being*50  
51 417 *told to stay on warfarin to avoid a potentially serious stroke. [Male, aged 72, age at stroke 72, N.10]*52  
53 418

1  
2  
3 419 Caregivers' related views

4  
5 420 **Questioning GP's motivation to prescribe**

6  
7  
8 421 Caregivers too raised concerns about GPs prescribing, principally statins, for financial rather than medical  
9  
10 422 reasons, which could indirectly affect adherence, especially in patients suffering from statin side effects.

11  
12  
13 423 *A caregiver (sister) suggested that GPs shouldn't be paid for prescribing statins and that the decision*  
14  
15 424 *should be based on clinical judgement alone. She suggested medication could be overprescribed as a*  
16  
17 425 *result for financial reasons [Gender and age unknown, age at stroke unknown, N.78]*

18  
19 426  
20  
21  
22 427 **Caregivers' difficulties as advocates of patients' medications**

23  
24 428 The caregivers' role as advocates for their family members came up in questioning prescribing practices,  
25  
26 429 highlighting caregivers' awareness of guidelines and difficulties at times with obtaining treatment  
27  
28 430 modifications on the behalf of patients. (The cost of atorvastatin has dropped since, so this post does not  
29  
30 431 reflect current practice).

31  
32  
33 432 *A caregiver recommended being firm with GPs about being put on atorvastatin if simvastatin was not*  
34  
35 433 *tolerated, as atorvastatin was a bit more expensive but recommended by NICE guidelines as an*  
36  
37 434 *alternative [Gender and age unknown, age at stroke unknown, N.18].*

38  
39 435  
40 436  
41  
42 437 **GPs' role advising about secondary prevention medications**

43  
44 438 Some survivors reflected on the role of GPs in their adherence. They felt that the GP's role was to provide  
45  
46 439 advice. Getting support from family in medication related decisions was considered important.

47  
48 440 *A male survivor agreed to stop taking a blood pressure tablet with his doctor because of intolerable*  
49  
50 441 *side effects, and his wife being a nurse made it easier. He felt strongly that doctors are there to advise*  
51  
52 442 *not instruct. [Male, age unknown, age at stroke unknown, N.63]*

53  
54  
55 443  
56  
57  
58  
59  
60

#### 444 Caregivers' related views

445 Caregivers also recognized the importance of medications and the need to continue taking tablets despite  
446 experiencing side effects. The importance of only stopping medication on GP's advice was highlighted.

447

448 *A caregiver reported that because of side-effects her husband had voluntarily come off all the*  
449 *medication he was taking, except for aspirin which he continued to use. She said they had agreed to*  
450 *this together with the GP and stressed the importance of doing so before stopping tablets. [Male, age*  
451 *54, age at stroke 52, N.68]*

452

#### 453 **Management of medication side effects**

##### 454 **Medications didn't necessarily cause side effects**

455 Survivors who did not experience medication side effects generally felt that taking medication was a positive  
456 preventative measure against stroke. Although threads of discussion were not analysed, these posts often were  
457 written in reply to users who complained about suffering from side effects.

458 *A male survivor advised it was better taking tablets than risking another mini-stroke. He had a severe*  
459 *stroke himself and was prescribed aspirin and simvastatin. He never experienced side effects and also*  
460 *knew others on the same statin who didn't experience any either. [Male age 67, age at stroke 63,*  
461 *N.52]*

##### 462 **Changing medications to avoid side effects**

463 Forum users reported changes in secondary prevention medications being made by the health professionals to  
464 counteract negative side effects, which helped adherence.

465 *A male survivor described that on a dosage of 8mg of warfarin he started to suffer migraines and*  
466 *bleeding, leading him to refuse the drug. After further conclusive tests, the consultant decided to take*  
467 *him off warfarin as he was taking persantin, which never gave him a headache or nosebleed. He*  
468 *acknowledged warfarin was an important drug, but didn't suit everyone. [Male, age 49, age at stroke*  
469 *49, N.47]*



1  
2  
3 470 **Perseverance with asking modifications to achieve optimal treatment**

4  
5 471 Doctors' and patients' perseverance in modifying medications was important to achieve optimal treatment.

6  
7 472 *A male survivor reported taking up to 7 different blood pressure tablets and that it was unusual for a*

8  
9 473 *stroke patient to only need a few. He recommended going back to the GP as necessary to keep*

10  
11 474 *changing tablets until the right combination was found [Male, age 52, age at stroke 52, N.64]*

12  
13 475

14  
15 476 Caregivers' related views

16  
17  
18 477 **Treatment adjustments to avoid side effects**

19  
20 478 Reduction of medication dosage by doctors and elimination of side effects was reported as a successful

21  
22 479 strategy to aid adherence.

23  
24 480 *A female caregiver described her husband suffering from considerable side effects from simvastatin*

25  
26 481 *40mg but when the GP changed to atorvastatin at a lower dose of 10mg he was able to cope. [Male,*

27  
28 482 *age 54, age at stroke 54, N.49]*

29  
30  
31 483 **Trusting healthcare professionals**

32  
33 484 Healthcare professionals had an important role in patients' trust in secondary prevention medications and

34  
35 485 consequently adherence.

36  
37  
38 486 *A survivor described how he trusted his vascular surgeon who had changed his medication from*

39  
40 487 *warfarin to aspirin and statin. The survivor was happy to take aspirin and felt it would be good to*

41  
42 488 *continue as the surgeon also took it regularly, concluding it must be beneficial [Survivor, male, age*

43  
44 489 *35, age at stroke 34, N.71]*

45  
46  
47 490

48 491 **Practicalities of secondary prevention medications**

49  
50  
51 492 **Capability and resources**

52  
53  
54 493 **Problems associated with taking tablets**

### 494 **Swallowing and handling medicines**

495 Swallowing difficulties were reported when taking tablets, especially in relation to the medication  
496 dipyridamole, due to its size.

497 *A male survivor described 'swallow panic', i.e. fear of choking when trying to take Dipyridamole*  
498 *capsules. The user reported it took around 3 months before he got over that. [Male, age 67, age at*  
499 *stroke 55, N.70]*

500 Size of tablets also caused handling difficulties due to stroke related impairments.

501 *A survivor agreed with another user about the problem with the size of dipyridamole tablets, which*  
502 *were getting stuck in the pill box organizer. [Female, age 46, age at stroke 45, N.30]*

503

### 504 Caregivers' related views

#### 505 **Treatment burden**

506 Taking multiple tablets also contributed to treatment burden experienced by caregivers. One caregiver  
507 described how this added to the survivor's episodic refusal to take any medications.

508 *A caregiver was asking advice on encouraging medication taking. He said his mother was on multiple*  
509 *tablets, up to 4 times a day, but was now refusing to take any at all and this did upset him. Persuading*  
510 *her to continue taking the most important tablets had taken hours to do. [Male, age 77, age at stroke*  
511 *77, N.9]*

512

#### 513 **Attending routine appointments**

514 Another practical difficulty was dealing with routine appointments which were considered burdensome,  
515 resulting in the survivors being non-adherent to medications.

516 *A caregiver (wife) described how her husband was adamant that he was not prepared to take statins*  
517 *because he didn't have the time to keep going back to the GP for check-ups. The caregiver reported*  
518 *feeling helpless. [Male, age 55, age at stroke 55, N.24]*

519

1  
2  
3 520 **Difficulties experienced by patients with disabilities**

4  
5 521 Caregivers of patients with severe disabilities such as aphasia and inability to communicate, made their job of  
6  
7 522 ensuring patients' adherence a difficult experience.

8  
9  
10 523 *A caregiver said she couldn't imagine what a stroke survivor was going through, with her mother*  
11 524 *unable to communicate following a stroke. She described her mother having difficulties with*  
12 525 *medications caused by previous changes in treatment. She felt her mother was giving up and wanted*  
13 526 *advice on dealing with aphasia. [Caregiver-daughter, age 52, age at stroke 47, N.54]*

17 527 **Problems with using storage devices**

18  
19  
20 528 Using Dosette boxes was sometimes a struggle for survivors with severe disabilities, and a source of worry for  
21  
22 529 caregivers.

23  
24 530 *A caregiver mentioned that despite using a nomad tray, tablets were still being taken from the wrong*  
25 531 *day with several days' worth of tablets being taken in a single day. His father in law often didn't take*  
26 532 *the time to work out the days or to look at the calendar [Male, age unknown, age at stroke unknown,*  
27 533 *N.40]*

32 534 **Seeking advice from pharmacists on managing medications**

33  
34  
35 535 Another caregiver described having to seek advice on the best way to manage the stroke survivor's  
36  
37 536 medications.

38  
39 537 *A caregiver said he went to the pharmacist and spent half an hour chatting about medications after*  
40 538 *which he bought a flip top multi-coloured medication box labeled with the days and doses. He also*  
41 539 *said it took him a while to establish the best way to fill the box without getting confused, eventually*  
42 540 *filling it a tablet at a time across the entire week, instead of a day at a time. (Male, age 82, age at*  
43 541 *stroke 82, N. 57)*

44  
45  
46  
47  
48  
49 542

50  
51 543 **Cost of medication**

52  
53  
54 544 Survivors' highlighted difficulties faced with meeting the cost of stroke medications.

1  
2  
3 545 *A female survivor described being prescribed both aspirin and simvastatin that she had to pay for.*  
4  
5 546 *She reported having to take out a credit card to pay for her medications as she was unable to work*  
6  
7 547 *and did not have any money coming or any benefits. [Female, age 59, age at stroke 59, N.72]*  
8  
9 548

## 11 549 **Storage devices and strategies for medication management**

13 550

### 16 551 **Using medication aids**

17 552 Stroke survivors also reported benefits from using medication aids including pill-boxes and medication  
18 553 wallets to facilitate medication taking behavior. These devices ensured the appropriate medication was being  
19 554 taken at the right time, while also allowing monitoring when boxes needed to be re-filled.

24 555 *A survivor agreed the storage box was useful to view medication and her husband didn't have to keep*  
25 556 *asking her whether she had taken her tablets as he could also see. She said it was irritating to be*  
26 557 *constantly asked. The box helped her also with not running out of medications as she filled it weekly*  
27 558 *and could tell when it was time for a repeat prescription. [Female, age 46, age at stroke 45, N.30]*  
28  
29  
30  
31

32 559

### 35 560 Caregivers' related views

#### 37 561 **Using medication instructions**

38 562 Caregivers highlighted how instructions were considered helpful in facilitating day to day medicine taking.  
39 563 Keeping track of medicines that had been taken was suggested as a method of ensuring good adherence.

44 564 *A caregiver (son) described making a note on the pill box asking the survivor to turn it over after*  
45 565 *taking the pills as this would mean the morning pills were now taken. A second instruction invited the*  
46 566 *survivor to do the same when taking the evening tablet. He suggested to forum users that a simple*  
47 567 *chart tracking when each medication was taken was also helpful. [Caregiver-son, age 82, age at*  
48 568 *stroke 82, N.57]*  
49  
50  
51  
52

53 569

1  
2  
3 570 **Good medication taking routines**

4  
5 571 **Creating good medication routines**

6  
7  
8 572 Linking daily tablet use to an everyday activity or placing tablets in a specific location which then acted as a  
9  
10 573 cue to take the medication was described as helpful by several users.

11  
12 574 *A survivor suggested using a white board and having method in place helped. She remembered taking*  
13  
14 575 *her own medications through repetition or linking tablet use to another everyday activity [Female,*  
15  
16 576 *age 54, age at stroke 46, N.19]*

17  
18  
19 577

20  
21 578 Caregivers' related views

22  
23  
24 579 **Reminding survivors about taking tablets**

25  
26  
27 580 Caregivers also played a key role in medication routines when survivors couldn't remember to take tablets.

28  
29 581 *A caregiver (wife) described regularly giving her husband his medication because stroke had caused*  
30  
31 582 *short term memory loss and he would forget them or sometimes take them over again. She said she*  
32  
33 583 *was now in total control of his medications which was fine because she was a nurse with experience*  
34  
35 584 *of this. [Female, Age 46, age at stroke 40, N.5]*

36  
37  
38 585

39  
40 586 **DISCUSSION**

41  
42  
43 587 **Summary of main findings**

44  
45 588 Data from an online forum provided a rich source of information, illuminating on practical and perceptual  
46  
47 589 barriers and facilitators to adherence to secondary prevention medications in stroke survivors and their  
48  
49 590 caregivers. These data highlight several points. Concerns around the bad press on statins could result in stroke  
50  
51 591 survivors being cautious about commencing/keep taking the medication, and opting for a change in diet as an  
52  
53 592 alternative (potentially a not medically appropriate decision and without healthcare professionals' support).  
54  
55 593 Survivors expressed concerns about being prescribed medications they considered inappropriate, questioned  
56  
57  
58  
59  
60

1  
2  
3 594 GPs' motivation to prescribe medications and at times realised when prescribing mistakes occurred.  
4  
5 595 Caregivers themselves reported some doubts about the effectiveness of tablets and difficulties in ensuring  
6  
7 596 good medication adherence, while recognising that it is ultimately a survivor's decision whether or not to take  
8  
9 597 medication, particularly when suffering from side effects. Indeed, not experiencing side effects from  
10  
11 598 secondary prevention medications was an important facilitator of adherence. Health professionals successfully  
12  
13 599 modifying treatment to manage side effects and awareness that not everyone suffers from side effects were  
14  
15 600 reported as increasing the motivation to take secondary prevention treatment. Believing that medications  
16  
17 601 reduced stroke risk, feeling reassured by taking secondary prevention treatment and experiencing another  
18  
19 602 cerebrovascular event as consequence of nonadherence were important drivers of necessity beliefs and  
20  
21 603 supported adherence.

22  
23  
24 604 Practical barriers included difficulties swallowing capsules, burden of multiple medications, stroke-related  
25  
26 605 communication impairments (e.g. aphasia) causing patients' confusion with any treatment changes,  
27  
28 606 difficulties meeting medication costs and with managing storage devices. Caregivers' posts greatly  
29  
30 607 contributed to these data. They reported that improved patients' adherence was linked to using medications  
31  
32 608 storage devices, getting help from pharmacists in organising medicines, assuming full control of their family  
33  
34 609 members' medication taking, and having previous experience and knowledge about medications and their  
35  
36 610 administration.

37  
38  
39 611

## 40 41 612 **Strengths and limitations**

42  
43  
44 613 This study has a number of strengths. Firstly, the method of data collection where descriptions by forum users  
45  
46 614 capture unprompted thoughts is unlikely to be affected by self-presentational bias. Information comes from  
47  
48 615 patients over a wide geographical area and includes people who might not take part in traditional research  
49  
50 616 because of severe disabilities, communication impairments or in the case of caregivers, because of lack of  
51  
52 617 time.<sup>11</sup> The forum creates a natural environment facilitating exchange in opinions and in-depth discussions  
53  
54 618 around several topics including secondary prevention medications. The important presence of caregivers in  
55  
56 619 online discussions is a further strength, offering a unique viewpoint on medication taking behavior of

1  
2  
3 620 survivors with severe disabilities. Given that patients with significant disabilities may not traditionally  
4  
5 621 participate in health research, the online forum may represent a potentially important method of data  
6  
7 622 collection through which these patients' views may be heard through their caregivers.  
8  
9

10 623         These findings however should be interpreted with caution. A key limitation of this research was that  
11  
12 624 forum data was from the years 2004- 2011 and therefore the findings reported here may not reflect current  
13  
14 625 practice in primary care. Lack of details about the underlying clinical scenarios described in some of the posts  
15  
16 626 made it difficult classifying emerging themes as barriers or facilitators to adherence. In addition, barriers and  
17  
18 627 facilitators were limited to those identified from the pre-defined search criteria. Different keywords may have  
19  
20 628 uncovered additional barriers to medication adherence we failed to identify, or revealed issues related to  
21  
22 629 medications in general rather than specifically secondary prevention ones. All forum posts were examined by  
23  
24 630 a moderator prior to being published online which may have restricted the views of some users. Finally, with  
25  
26 631 the majority of forum users under the age of 70, it is possible that this method of data collection overlooks a  
27  
28 632 significant proportion of the older stroke population.  
29  
30

31 633

### 32 33 634 **Comparisons with existing literature**

34  
35  
36 635         Our investigation shed light on the significance stroke survivors and caregivers attributed to the bad  
37  
38 636 press on statins, which impacted on their adherence. This is in agreement with a recent investigation  
39  
40 637 concluding that negative statin related news stories was associated with early discontinuation of statin and  
41  
42 638 increased risk of death by cardiovascular disease.<sup>26</sup> Furthermore, people already taking statin were found to  
43  
44 639 be more likely to stop this medication following high media coverage,<sup>27</sup> or when side effects were not  
45  
46 640 tolerable despite GP's attempts to modify treatment.<sup>17</sup> Beliefs about secondary prevention medications  
47  
48 641 differed at times between survivors and caregivers. Some stroke survivors decided to stop medications  
49  
50 642 because of intolerable side effects, despite their caregivers' believing optimal adherence was important to  
51  
52 643 prevent stroke recurrences. In the context of medication side effects, caregivers believed in their role as  
53  
54 644 patients' advocates with healthcare professionals (including GPs and pharmacist) and often discussed and  
55  
56 645 sought advice from other users in the forum on the matter. Findings from the present study also highlight the  
57  
58  
59  
60

1  
2  
3 646 difficulties experienced by stroke survivors using blister packaged medication and dosette boxes, despite at  
4  
5 647 the same time outlining their benefit in terms of adherence. Evidence from a systematic review has  
6  
7 648 demonstrated significant improvement in adherence for those in the group using reminder packaging<sup>28</sup> as  
8  
9 649 well as using pill boxes and blister packs in packaging interventions in cardiovascular disease<sup>29</sup> while the use  
10  
11 650 of reminder packaging may be a simple way of improving adherence to medication<sup>30</sup> With older people  
12  
13 651 known to experience difficulties taking medication, developing interventions that seek to combine the use of  
14  
15 652 medication management devices with caregiver co-operation may be one way of addressing the practical  
16  
17 653 challenges they face.

18  
19  
20 654 This study highlights a couple of interesting findings. Survivors reported making decisions about  
21  
22 655 taking or not secondary prevention medications sometimes independently from their GPs, despite considering  
23  
24 656 GPs' support important. Collaborative decision making involving caregivers, clinicians or pharmacists may  
25  
26 657 however empower stroke survivors to make better informed decisions about secondary prevention  
27  
28 658 medications. Understanding how patients make decision about medications is important<sup>31</sup> and GPs may  
29  
30 659 benefit from enhancing caregivers' role in the decision making process about medications.

31  
32  
33 660 Barriers to caring for the stroke survivor post hospital discharge have included a lack of collaboration with the  
34  
35 661 healthcare team and a lack of community support for the caregiving role<sup>32</sup> as well as insufficient knowledge  
36  
37 662 and skills to care for the survivor in the home.<sup>33</sup> We described in this study the struggle caregivers face in their  
38  
39 663 role as advocate of patients, on one side engaging with healthcare professionals for ensuring that  
40  
41 664 recommended secondary prevention treatment is received, and on the other side wanting to support and  
42  
43 665 respect patients' decisions about taking or not taking medications. Caregivers facing this dilemma could  
44  
45 666 benefit from greater support by GPs and pharmacists. Caregivers could play an important role in bridging the  
46  
47 667 gap between health professional and stroke survivor in primary care and deserve more research and clinical  
48  
49 668 attention. Developing interventions that seek to encourage active caregivers' engagement in stroke survivors'  
50  
51 669 and healthcare professionals' shared-decision making, can help to address more comprehensively barriers to  
52  
53 670 adherence as well as delivering a care program tailored to the individual needs of patients.<sup>8</sup>



1  
2  
3 671 Barriers highlighted here are in line with those reported by another qualitative study, where negative  
4  
5 672 or erroneous beliefs about tablets, doubts around the effectiveness of medication and concerns about the  
6  
7 673 consequences of not taking tablets were associated with being low adherers.<sup>34</sup> Greater emphasis on informing  
8  
9 674 stroke survivors and caregivers about secondary prevention medications in primary care is needed. In a recent  
10  
11 675 randomised trial evaluating an educational package for stroke survivors and caregivers, participants who  
12  
13 676 received tailored information along with verbal reinforcement reported a greater satisfaction with medical and  
14  
15 677 practical services.<sup>35</sup>  
16  
17  
18 678 Survivors' concerns around the need for secondary prevention medications may reflect a wider pattern of  
19  
20 679 misunderstanding about the benefits of such drugs. In an assessment of attitudes towards taking cardiovascular  
21  
22 680 medications, caution expressed around medications was linked with how great their risk to health was  
23  
24 681 perceived to be.<sup>36</sup> A meta-analysis examining the necessity-concerns framework across a range of conditions  
25  
26 682 found that experiencing the consequences of nonadherence reinforced the subsequent need to take tablets,  
27  
28 683 acting as a driver of medication adherence,<sup>37</sup> in agreement with what is reported in this study by both stroke  
29  
30 684 survivors and caregivers.

31  
32  
33 685

34  
35 686 Although statins are known to reduce the risk of stroke by as much as 25%,<sup>38</sup> benefits are undermined  
36  
37 687 by suboptimal adherence. In a previous examination on patient perspectives around statin therapy,  
38  
39 688 compliance with statins was associated with information provided during the practitioner consultation as well  
40  
41 689 as the beliefs about cholesterol and current health status<sup>39</sup>. This concurs with the findings in our study. In a  
42  
43 690 recent investigation exploring nonadherence and patient's perceptions towards statins, it was found that up to  
44  
45 691 three quarters of participants doubted the necessity of statins, lacked knowledge about this medication, and  
46  
47 692 concerns around side effects were significantly associated with intentional nonadherence.<sup>40</sup>

48  
49  
50 693 In this online forum we found evidence that stroke survivors establish routines and use cues to facilitate  
51  
52 694 medication taking. This is in agreement with previous findings, including a pilot trial in which a plan to  
53  
54 695 establish medication routine resulted in significantly greater adherence among survivors.<sup>41,42</sup> Providing  
55  
56 696 support to establish medication taking routines particularly among older patients with stroke can be

1  
2  
3 697 beneficial.<sup>43</sup> Challenges to adherence with warfarin therapy, including beliefs about the need for this treatment  
4  
5 698 have been highlighted previously, suggesting the benefit of a more collaborative patient - practitioner  
6  
7 699 approach, focusing on education around anticoagulant therapy.<sup>44</sup>  
8

9  
10 700 These findings add to current literature by providing an assessment of adherence from users of an  
11  
12 701 online forum. There has been little research on this approach to data collection conducted to date. The study  
13  
14 702 identifies adherence concerns of a younger stroke population who may be less likely to be represented in  
15  
16 703 research studies and whose attitudes to medication may be less well known. Findings add to the literature and  
17  
18 704 shed lights on dynamic interactions between the survivor, caregiver and health professionals and the extent to  
19  
20 705 which this influences medication adherence in this patient group.  
21

22 706

23 707

### 24 708 **Implications for clinical practice**

25 709 These findings demonstrate the need to address identified barriers to adherence to secondary prevention  
26  
27 710 medications within clinical practice. Improving patient- and caregiver-practitioner communication through  
28  
29 711 more effective clinical consultations has the potential to benefit patients and encourage a greater  
30  
31 712 understanding of the importance of secondary prevention medications. This approach could contribute not  
32  
33 713 only to shaping patients' beliefs about medications but also to improving confidence around taking them.  
34  
35 714 Challenging negative medication beliefs and adopting practices that implement simple medication taking  
36  
37 715 routines and appropriate use of tablet storage devices, particularly for those patients with more severe  
38  
39 716 disabilities as a result of stroke, can increase adherence and ultimately improve health outcomes.<sup>40, 41</sup>  
40

41 717 Both primary and secondary healthcare professionals should seek to engage the family of survivors and their  
42  
43 718 support network to challenge concerns around taking tablets, offer reassurance on the benefits of medications,  
44  
45 719 discuss the need for treatment in light of side effects, and even support patients' informed decision to refuse  
46  
47 720 medications.  
48  
49  
50  
51  
52  
53  
54

1  
2  
3 721 Interventions using ‘expert patients’ or ‘expert caregivers’ providing support to stroke survivors and  
4  
5 722 caregivers in the primary care setting hold potential.<sup>15</sup>  
6  
7 723 Internet fora for patients with stroke provide a potentially important resource through which the attitudes of  
8  
9 724 survivors and their caregivers towards medication use can be better understood.  
10  
11 725 These findings provide new insight to clinicians about younger stroke survivors’ concerns and the struggles  
12  
13 726 caregivers might face in their role as patients’ advocates. Awareness of these factors will improve  
14  
15 727 consultations about secondary prevention medication with both younger survivors and stroke survivors’  
16  
17 728 caregivers. Stroke survivors with severe disabilities and their caregivers experience significant practical  
18  
19 729 barriers to adherence. Greater focus on such practicalities by healthcare professionals would be beneficial.  
20  
21 730 This study highlights caregivers’ unique position in overseeing patients’ medications. Exploring the stroke  
22  
23 731 survivor-caregiver dynamic can shed light on potential barriers to adherence to secondary prevention  
24  
25 732 medication and ways to address them, eventually improving patients’ outcomes.  
26  
27  
28  
29

733

#### 734 **Future research**

735 Our study suggests that caregivers play an important role in bridging the gap between patient and practitioner  
736 with regard to informing and facilitating the medication taking process. Future research should therefore  
737 further explore their role in stroke survivors’ medication taking and systematically incorporate them into  
738 adherence interventions.

739 Given the strong focus of forum users on statins, understanding why stroke survivors choose not to take  
740 statins as prescribed and suggesting to healthcare professionals effective ways of dealing with this issue  
741 should be a key focus for research in this area. With adverse events the most common reason for poor  
742 adherence to statin therapy, improved patient understanding of this medication through greater  
743 communication with the practitioner can help to address ongoing concerns.<sup>45</sup>

744 Future interventions should aim at further improving medication taking routines after stroke, using cues to  
745 prompt tablet taking. Advances in technology could facilitate delivery of such interventions. One novel  
746 approach to improving adherence particularly with regards to multiple medications is the use of fixed-dose

1  
2  
3 747 combination therapy ‘polypill approach’.<sup>46</sup> Indeed a recent systematic review of barriers and facilitators of  
4  
5 748 adherence to secondary prevention medications within cardiovascular disease found fixed dose combination  
6  
7 749 (FDC) therapy to be an important facilitator associated with high adherence.<sup>41</sup>  
8  
9

10 750

## 11 751 **Conclusion**

12  
13  
14  
15 752 This study identified barriers and facilitators to medication adherence for stroke through analysing data from  
16  
17 753 an online forum using a framework approach. Developing interventions which build on these results according  
18  
19 754 to the framework has the potential to improve medication adherence and ultimately reduce the burden of  
20  
21 755 stroke. Greater efforts are needed to meet the growing challenges faced by stroke survivors and their  
22  
23 756 caregivers and to enable primary care clinicians to effectively address the burden of nonadherence to  
24  
25 757 secondary prevention medications.  
26

## 27 758 Acknowledgements

28  
29  
30 759 The authors are grateful to the Stroke Association for permission to analyse the archives of the TalkStroke  
31  
32 760 forum.  
33

## 34 761 Competing Interests

35  
36  
37 762 None declared  
38

## 39 763 Author/s contribution

40  
41  
42  
43 764 ADS conceived of the study, is the Chief Investigator, contributed to the data analysis and commented on the  
44  
45 765 manuscript. JM is a co-investigator on the study, wrote and commented on the manuscript. SS is a co-  
46  
47 766 investigator on the study, wrote and commented on the manuscript. JJ contributed to the study design,  
48  
49 767 conducted the data analysis and prepared the manuscript for submission. All authors agreed on the final draft  
50  
51 768 of the submitted manuscript.  
52

53  
54 769

55  
56  
57 770  
58  
59  
60

## References

1. Jørgensen HS, Nakayama H, Reith J, et al. Stroke recurrence: predictors, severity, and prognosis. The Copenhagen Stroke Study. *Neurology* 1997;**48**(4):891-95.
2. Scarborough P, Peto, V., Bhatnagar, P., Kaur, A., Leal, J., Luengo-Fernandez, R., Gray, A., Rayner, M., Allender, S., 1. Stroke statistics: 2009 Edition, 2009.
3. Wolf PA, Clagett GP, Easton JD, et al. Preventing Ischemic Stroke in Patients With Prior Stroke and Transient Ischemic Attack. A Statement for Healthcare Professionals From the Stroke Council of the American Heart Association 1999;**30**(9):1991-94.
4. Hankey GJ. Secondary stroke prevention. *The Lancet Neurology* 2014;**13**(2):178-94.
5. Yusuf S. Two decades of progress in preventing vascular disease. *The Lancet* 2002;**360**(9326):2-3.
6. Souter C, Kinnear A, Kinnear M, et al. Optimisation of secondary prevention of stroke: a qualitative study of stroke patients' beliefs, concerns and difficulties with their medicines. *International Journal of Pharmacy Practice* 2014;**22**(6):424-32.
7. Kronish I, Diefenbach M, Edmondson D, et al. Key Barriers to Medication Adherence in Survivors of Strokes and Transient Ischemic Attacks. *Journal of General Internal Medicine* 2013;**28**(5):675-82.
8. Bauler S, Jacquin-Courtois S, Haesebaert J, et al. Barriers and Facilitators for Medication Adherence in Stroke Patients: A Qualitative Study Conducted in French Neurological Rehabilitation Units. *European Neurology* 2014;**72**(5-6):262-70.
9. Kelly-Hayes M, Beiser A, Kase CS, et al. The influence of gender and age on disability following ischemic stroke: the Framingham study. *Journal of Stroke and Cerebrovascular Diseases* 2003;**12**(3):119-26.
10. De Simoni A, Mant J, Sutton S. Adherence to medication in stroke survivors dependent on caregivers. *British Journal of General Practice* 2015;**65**(640):e789.
11. De Simoni A, Shanks A, Mant J, et al. Making sense of patients' internet forums: a systematic method using discourse analysis. *British Journal of General Practice* 2014;**64**(620):e178-e80.
12. De Simoni A HR, Fleming L, Bush A, Griffiths CJ. What do adolescents with asthma really think about adherence to inhalers? Insights from a qualitative analysis of a UK online forum. *BMJ Open* 2017;**In Press**.

- 1  
2  
3 798 13. Travis SS, Bethea LS, Winn P. Medication Administration Hassles Reported by Family Caregivers of  
4  
5 799 Dependent Elderly Persons. *The Journals of Gerontology Series A: Biological Sciences and Medical*  
6  
7 800 *Sciences* 2000;**55**(7):M412-M17.
- 8  
9 801 14. Jamison J, Graffy J, Mullis R, et al. Barriers to medication adherence for the secondary prevention of  
10  
11 802 stroke: a qualitative interview study in primary care. *British Journal of General Practice* 2016.
- 12  
13 803 15. Aggarwal B, Liao M, Mosca L. Medication Adherence Is Associated with Having a Caregiver Among  
14  
15 804 Cardiac Patients. *Annals of Behavioral Medicine* 2013;**46**(2):237-42.
- 16  
17 805 16. De Simoni A, Shanks A, Balasooriya-Smeekens C, et al. Stroke survivors and their families receive  
18  
19 806 information and support on an individual basis from an online forum: descriptive analysis of a  
20  
21 807 population of 2348 patients and qualitative study of a sample of participants. *BMJ Open* 2016;**6**(4).
- 22  
23 808 17. Izuka NJ, Alexander, M.A.W., Balasooriya-Smeekens, C., Mant, J., De Simoni, A. How do stroke  
24  
25 809 survivors and their carers use practitioners' advice on secondary prevention medications? Qualitative  
26  
27 810 study of an online forum. *Fam Pract* 2017.
- 28  
29 811 18. Balasooriya-Smeekens C, Bateman A, Mant J, et al. Barriers and facilitators to staying in work after  
30  
31 812 stroke: insight from an online forum. *BMJ Open* 2016;**6**(4).
- 32  
33 813 19. Horne R. Compliance adherence and Concordance. In: Harding KTG, ed. *Pharmacy Practice*. London:  
34  
35 814 Taylor & Franics, 2001.
- 36  
37 815 20. Horne R WJ, Barber N, Elliott R, Morgan M. Concordance, adherence and compliance in medicine –  
38  
39 816 taking. Report for the National Co-ordinating Centre for NHS Service Delivery and Organisation  
40  
41 817 R&D, 2005.
- 42  
43 818 21. Anthony L. AntConc (Version 3.2.4) [Computer Software]. Tokyo, Japan: Waseda University; 2016  
44  
45 819 [Available from: Available from <http://www.laurenceanthony.net/>].
- 46  
47 820 22. Eysenbach G, Till JE. Ethical issues in qualitative research on internet communities. *BMJ*  
48  
49 821 2001;**323**(7321):1103-05.
- 50  
51 822 23. Braun V, Clarke V. Using thematic analysis in psychology. *Qualitative Research in Psychology*  
52  
53 823 2006;**3**(2):77-101.
- 54  
55  
56  
57  
58  
59  
60

- 1  
2  
3 824 24. Seale C, Charteris-Black J, MacFarlane A, et al. Interviews and Internet Forums: A Comparison of Two  
4  
5 825 Sources of Qualitative Data. *Qualitative Health Research* 2010;**20**(5):595-606.  
6  
7 826 25. Esquivel A, Meric-Bernstam F, Bernstam EV. Accuracy and self correction of information received from  
8  
9 827 an internet breast cancer list: content analysis. *BMJ* 2006;**332**(7547):939-42.  
10  
11 828 26. Nielsen SF, Nordestgaard BG. Negative statin-related news stories decrease statin persistence and increase  
12  
13 829 myocardial infarction and cardiovascular mortality: a nationwide prospective cohort study. *European*  
14  
15 830 *Heart Journal* 2016;**37**(11):908-16.  
16  
17 831 27. Matthews A, Herrett E, Gasparrini A, et al. Impact of statin related media coverage on use of statins:  
18  
19 832 interrupted time series analysis with UK primary care data. *BMJ* 2016;**353**.  
20  
21 833 28. Boeni F, Spinatsch E, Suter K, et al. Effect of drug reminder packaging on medication adherence: a  
22  
23 834 systematic review revealing research gaps. *Systematic Reviews* 2014;**3**(1):29.  
24  
25 835 29. Conn VS, Ruppap TM, Chan KC, et al. Packaging interventions to increase medication adherence:  
26  
27 836 systematic review and meta-analysis. *Current Medical Research and Opinion* 2015;**31**(1):145-60.  
28  
29 837 30. Mahtani KR, Heneghan CJ, Glasziou PP, et al. Reminder packaging for improving adherence to self-  
30  
31 838 administered long-term medications. *Cochrane Database Syst Rev*, 2011.  
32  
33 839 31. Benson J, Britten N. Patients' decisions about whether or not to take antihypertensive drugs: qualitative  
34  
35 840 study. *BMJ : British Medical Journal* 2002;**325**(7369):873-73.  
36  
37 841 32. White CL, Korner-Bitensky N, Rodrigue N, et al. Barriers and facilitators to caring for individuals with  
38  
39 842 stroke in the community: the family's experience. *Canadian journal of neuroscience nursing*  
40  
41 843 2007;**29**(2):5-12.  
42  
43 844 33. Smith LN, Lawrence M, Kerr SM, et al. Informal carers' experience of caring for stroke survivors. *Journal*  
44  
45 845 *of Advanced Nursing* 2004;**46**(3):235-44.  
46  
47 846 34. Chambers JA, O'Carroll RE, Hamilton B, et al. Adherence to medication in stroke survivors: A qualitative  
48  
49 847 comparison of low and high adherers. *British Journal of Health Psychology* 2011;**16**(3):592-609.  
50  
51 848 35. Eames S, Hoffmann T, Worrall L, et al. Randomised controlled trial of an education and support package  
52  
53 849 for stroke patients and their carers. *BMJ Open* 2013;**3**(5).  
54  
55  
56  
57  
58  
59  
60

- 1  
2  
3 850 36. Gale NK, Greenfield S, Gill P, et al. Patient and general practitioner attitudes to taking medication to  
4  
5 851 prevent cardiovascular disease after receiving detailed information on risks and benefits of treatment:  
6  
7 852 a qualitative study. *BMC Family Practice* 2011;**12**(1):1-10.
- 8  
9 853 37. Horne R, Chapman SCE, Parham R, et al. Understanding Patients' Adherence-Related Beliefs about  
10  
11 854 Medicines Prescribed for Long-Term Conditions: A Meta-Analytic Review of the Necessity-Concerns  
12  
13 855 Framework. *PLOS ONE* 2013;**8**(12):e80633.
- 14  
15 856 38. Afilalo J, Duque G, Steele R, et al. Statins for Secondary Prevention in Elderly Patients: A Hierarchical  
16  
17 857 Bayesian Meta-Analysis. *Journal of the American College of Cardiology*; **51**(1):37-45.
- 18  
19 858 39. Tolmie EP, Lindsay GM, Kerr SM, et al. Patients' Perspectives on Statin Therapy for Treatment of  
20  
21 859 Hypercholesterolaemia: A Qualitative Study. *European Journal of Cardiovascular Nursing*  
22  
23 860 2003;**2**(2):141-49.
- 24  
25 861 40. Wouters H, Van Dijk L, Geers HCJ, et al. Understanding Statin Non-Adherence: Knowing Which  
26  
27 862 Perceptions and Experiences Matter to Different Patients. *PLoS ONE* 2016;**11**(1):e0146272.
- 28  
29 863 41. Banerjee A, Khandelwal S, Nambiar L, et al. Health system barriers and facilitators to medication  
30  
31 864 adherence for the secondary prevention of cardiovascular disease: a systematic review. *Open Heart*  
32  
33 865 2016;**3**(2).
- 34  
35 866 42. O'Carroll RE, Chambers JA, Dennis M, et al. Improving adherence to medication in stroke survivors: a  
36  
37 867 pilot randomised controlled trial. *Ann Behav Med* 2013;**46**(3):358-68.
- 38  
39 868 43. Sanders MJ, Van Oss T. Using Daily Routines to Promote Medication Adherence in Older Adults.  
40  
41 869 *American Journal of Occupational Therapy* 2013;**67**(1):91-99.
- 42  
43 870 44. Kneeland PP, Fang MC. Current issues in patient adherence and persistence: focus on anticoagulants for  
44  
45 871 the treatment and prevention of thromboembolism. *Patient preference and adherence* 2010;**4**:51-60.
- 46  
47 872 45. Maningat P, Gordon BR, Breslow JL. How Do We Improve Patient Compliance and Adherence to Long-  
48  
49 873 Term Statin Therapy? *Current atherosclerosis reports* 2013;**15**(1):291-91.
- 50  
51 874 46. Castellano JM, Sanz G, Penalvo JL, et al. A polypill strategy to improve adherence: results from the  
52  
53 875 FOCUS project. *J Am Coll Cardiol* 2014;**64**(20):2071-82.
- 54  
55  
56  
57 876



|                                                                     | N  | Median Range |     |
|---------------------------------------------------------------------|----|--------------|-----|
| <b>Sample characteristics</b>                                       |    |              | 877 |
| Total participants identified in posts                              | 84 |              | 878 |
| Number of posts in the forum/ participant                           |    | 16 (1-4932)  | 879 |
| Number of posts about secondary prevention medications/ participant |    | 1 (1-37)     | 880 |
| <b>Age at stroke</b>                                                |    |              | 881 |
| Survivor                                                            |    | 50 (32-72)   | 882 |
| Patient by caregiver                                                |    | 66 (46-91)   | 883 |
| <b>Gender</b>                                                       |    |              | 884 |
| Male -Survivor                                                      | 20 |              | 885 |
| Female- Survivor                                                    | 26 |              | 886 |
| Not known - Survivor                                                | 3  |              | 887 |
| Male -Patient talked about by caregiver                             | 20 |              | 888 |
| Female - Patient by caregiver*                                      | 12 |              | 889 |
| Unknown gender and unknown identity                                 | 3  |              | 890 |
| <b>Identity person posting</b>                                      |    |              | 891 |
| Stroke survivor                                                     | 49 |              | 892 |
| Caregiver                                                           | 33 |              | 893 |
| Not known                                                           | 2  |              | 894 |
| <b>Years since stroke</b>                                           |    |              | 895 |
| (0-12 mths)                                                         | 37 |              | 896 |
| (1-5 yrs)                                                           | 25 |              | 897 |
| (6-10 yrs)                                                          | 4  |              | 898 |
| (11-15 yrs)                                                         | 2  |              | 899 |
| (15+ yrs)                                                           | 1  |              | 900 |
| Unknown                                                             | 15 |              | 901 |
| <b>Caregiver identity</b>                                           |    |              | 902 |
| Daughter /son                                                       | 20 |              | 903 |
| Spouse                                                              | 9  |              | 904 |
| Other (/in law/ sister)                                             | 3  |              | 905 |
| Unknown                                                             | 1  |              | 906 |
| Legend: * Patient talked about by a caregiver                       |    |              | 907 |

1  
2  
3 908  
4  
5 909  
6  
7 910  
8  
9  
10  
11  
12  
13  
14  
15  
16  
17  
18  
19  
20  
21  
22  
23  
24  
25  
26  
27  
28  
29  
30  
31  
32  
33  
34  
35  
36  
37  
38  
39  
40  
41  
42  
43  
44  
45  
46  
47  
48  
49  
50  
51  
52  
53  
54  
55  
56  
57  
58  
59  
60

Table 1. Characteristics of online Talkstroke participants as identified in the study posts

| <b>Perceptions</b>                                                                                                                                                                                                                                                                                                                                                                                                                                                                                                                                                                                                                                                                                                                                                                                                                                                                                                                                                                                                                                                                                                                                                                                                                                                                                           |                                                                                                                                                                                                                                                                                                                                                                                                                                                                                                                                                                                                                                                                                                                                                                                                                                                                                                                                                                                                                                                                                                                                                                                                                                                              |
|--------------------------------------------------------------------------------------------------------------------------------------------------------------------------------------------------------------------------------------------------------------------------------------------------------------------------------------------------------------------------------------------------------------------------------------------------------------------------------------------------------------------------------------------------------------------------------------------------------------------------------------------------------------------------------------------------------------------------------------------------------------------------------------------------------------------------------------------------------------------------------------------------------------------------------------------------------------------------------------------------------------------------------------------------------------------------------------------------------------------------------------------------------------------------------------------------------------------------------------------------------------------------------------------------------------|--------------------------------------------------------------------------------------------------------------------------------------------------------------------------------------------------------------------------------------------------------------------------------------------------------------------------------------------------------------------------------------------------------------------------------------------------------------------------------------------------------------------------------------------------------------------------------------------------------------------------------------------------------------------------------------------------------------------------------------------------------------------------------------------------------------------------------------------------------------------------------------------------------------------------------------------------------------------------------------------------------------------------------------------------------------------------------------------------------------------------------------------------------------------------------------------------------------------------------------------------------------|
| Barriers                                                                                                                                                                                                                                                                                                                                                                                                                                                                                                                                                                                                                                                                                                                                                                                                                                                                                                                                                                                                                                                                                                                                                                                                                                                                                                     | Facilitators                                                                                                                                                                                                                                                                                                                                                                                                                                                                                                                                                                                                                                                                                                                                                                                                                                                                                                                                                                                                                                                                                                                                                                                                                                                 |
| <p><b>Necessity beliefs</b><br/><b>Lack of perceived benefits of medication</b></p> <ul style="list-style-type: none"> <li>• Questioning the effectiveness of secondary prevention medications in preventing stroke recurrence.</li> <li>• Considering statins detrimental to health and not effective.</li> <li>• <i>Valuing adherence but recognising that is the choice of the patient to take tablets.</i></li> <li>• <i>Realising that stroke could still occur despite taking secondary prevention medications.</i></li> </ul> <p><b>Concerns</b><br/><b>Management of medication side effects*</b></p> <ul style="list-style-type: none"> <li>• Experiencing statins side effects and considering they have potential to worsen quality of life.</li> <li>• Changing diet/lifestyle as alternative to taking medication to reduce side effects.*</li> <li>• Healthcare professionals recommending diet and exercise to reduce cholesterol instead of taking statins.*</li> <li>• <i>Struggling to raise issues about side effects of statins with healthcare professionals and obtaining changes in treatment when patients find it unsuitable.</i></li> </ul> <p><b>Impact of bad press on statins</b></p> <ul style="list-style-type: none"> <li>• Being extra-cautious about commencing</li> </ul> | <p><b>Necessity beliefs</b><br/><b>Attributing importance to medications</b></p> <ul style="list-style-type: none"> <li>• Recognising taking tablets as important to prevent stroke recurrence.</li> <li>• Feeling reassured by taking secondary prevention medications.</li> <li>• Experiencing consequences of nonadherence (a further stroke) as driver of necessity beliefs.</li> <li>• <i>Feeling secondary prevention medications are important and should only be stopped in consultation with the GP.</i></li> <li>• <i>Holding strong beliefs about the need for secondary prevention medications.</i></li> </ul> <p><b>Concerns</b><br/><b>Management of medication side effects*</b></p> <ul style="list-style-type: none"> <li>• Awareness that not all patients are affected by side effects.</li> <li>• Healthcare professionals changing medications to counteract side effects</li> <li>• Modifying medications to achieve optimal treatment</li> <li>• <i>Obtaining changes in treatment from healthcare professionals until side effects are manageable</i></li> </ul> <p><b>Trusting healthcare professionals</b></p> <ul style="list-style-type: none"> <li>• Perceiving medications to be beneficial as secondary healthcare</li> </ul> |

36

|                                                                                                                                                                                                                                                                                                                                                                                                                                                                                                                                                                                                                                                                                                                                                                                                                                                                                                                                                               |                                                                                                                                                                                                                                                                                                                                                                                                                                                                                                                                                                                                                                                           |
|---------------------------------------------------------------------------------------------------------------------------------------------------------------------------------------------------------------------------------------------------------------------------------------------------------------------------------------------------------------------------------------------------------------------------------------------------------------------------------------------------------------------------------------------------------------------------------------------------------------------------------------------------------------------------------------------------------------------------------------------------------------------------------------------------------------------------------------------------------------------------------------------------------------------------------------------------------------|-----------------------------------------------------------------------------------------------------------------------------------------------------------------------------------------------------------------------------------------------------------------------------------------------------------------------------------------------------------------------------------------------------------------------------------------------------------------------------------------------------------------------------------------------------------------------------------------------------------------------------------------------------------|
| <p>statins for fear of side effects</p> <ul style="list-style-type: none"> <li>• <i>Struggling to ensure patients' adherence to statins in face of bad press.</i></li> </ul> <p><b>Questioning prescribing practices</b></p> <ul style="list-style-type: none"> <li>• Being disappointed as medications considered ineffective were not changed by GPs.</li> <li>• Having concerns around incorrect medications being prescribed.</li> <li>• Receiving conflicting information about medications.</li> <li>• <i>Worrying about medications being prescribed for financial reasons or guidelines over clinical judgement</i></li> <li>• <i>Experiencing difficulties with asking GPs to prescribe alternative tablets as current ones considered unsuitable.</i></li> <li>• <i>Feeling the role of GPs is limited to advising about secondary prevention medications</i></li> <li>• <i>Intentionally missing medications to manage side effects</i></li> </ul> | <p>professional also taking it.</p>                                                                                                                                                                                                                                                                                                                                                                                                                                                                                                                                                                                                                       |
| <b>Practicalities</b>                                                                                                                                                                                                                                                                                                                                                                                                                                                                                                                                                                                                                                                                                                                                                                                                                                                                                                                                         |                                                                                                                                                                                                                                                                                                                                                                                                                                                                                                                                                                                                                                                           |
| Barriers                                                                                                                                                                                                                                                                                                                                                                                                                                                                                                                                                                                                                                                                                                                                                                                                                                                                                                                                                      | Practicalities                                                                                                                                                                                                                                                                                                                                                                                                                                                                                                                                                                                                                                            |
| <p><b>Problems associated with taking tablets</b></p> <ul style="list-style-type: none"> <li>• Swallowing medication capsules, especially big size ones.</li> <li>• Experiencing difficulties with handling medications due to size and stroke related physical impairments.</li> <li>• <i>Experiencing frustration with burden of multiple medications and episodic patients' refusal of medications.</i></li> <li>• <i>Experiencing frustration at patient refusal to take statins and attend routine medication appointment.</i></li> <li>• <i>Experiencing difficulties when helping patients with aphasia taking tablets in the context of changes in treatment.</i></li> <li>• <i>Experiencing frustration at patients failing to keep up with refilling prescriptions.</i></li> </ul> <p><b>Cost of medications</b></p> <ul style="list-style-type: none"> <li>• Struggling to meet the costs of secondary prevention medications.</li> </ul>          | <p><b>Storage devices for managing medication</b></p> <ul style="list-style-type: none"> <li>• Using pill box: helping seeing the correct medication was taken and when prescription needed to be renewed.</li> <li>• <i>Using pill-boxes to provide written instruction to patients or keeping a note of tablets taken.</i></li> <li>• <i>Advice from pharmacist on taking medication correctly.</i></li> </ul> <p><b>Good medication taking routines</b></p> <ul style="list-style-type: none"> <li>• Linking tablet use to an everyday activity to facilitate medication taking behaviour.</li> <li>• <i>Assuming control of medication</i></li> </ul> |

|                                                                                                                                                                                                                                                                                                      |                                                                                                        |
|------------------------------------------------------------------------------------------------------------------------------------------------------------------------------------------------------------------------------------------------------------------------------------------------------|--------------------------------------------------------------------------------------------------------|
|                                                                                                                                                                                                                                                                                                      | <i>when patients have problems with short term memory and reminding when tablets have to be taken.</i> |
| <p>Legend: Statements in italics refer to caregivers' themes.<br/> * Because of missing details of the underlying clinical scenario, these themes could act both as barriers or facilitators to adherence to secondary prevention medications, therefore have been reported under both headings.</p> |                                                                                                        |

911 Table 2. Key themes highlighting survivors' and caregivers' barriers and facilitators to adherence to  
912 secondary prevention medications classified according to perceptions and practicalities.

For peer review only

1  
2  
3  
4  
5  
6  
7  
8  
9  
10  
11  
12  
13  
14  
15  
16  
17  
18  
19  
20  
21  
22  
23  
24  
25  
26  
27  
28  
29  
30  
31  
32  
33  
34  
35  
36  
37  
38  
39  
40  
41  
42  
43  
44  
45  
46  
47  
48  
49

For peer review only

1  
2  
3  
4  
5  
6  
7  
8  
9  
10  
11  
12  
13  
14  
15  
16  
17  
18  
19  
20  
21  
22  
23  
24  
25  
26  
27  
28  
29  
30  
31  
32  
33  
34  
35  
36  
37  
38  
39  
40  
41  
42  
43  
44  
45  
46  
47  
48  
49  
50  
51  
52  
53  
54  
55  
56  
57  
58  
59  
60

For peer review only

Supplementary File 1. Analysis strategy to identify study posts

1  
2  
3  
4  
5  
6  
7  
8  
9  
10  
11  
12  
13  
14  
15  
16  
17  
18  
19  
20  
21  
22  
23  
24  
25  
26  
27  
28  
29  
30  
31  
32  
33  
34  
35  
36  
37  
38  
39  
40  
41  
42  
43  
44  
45  
46  
47

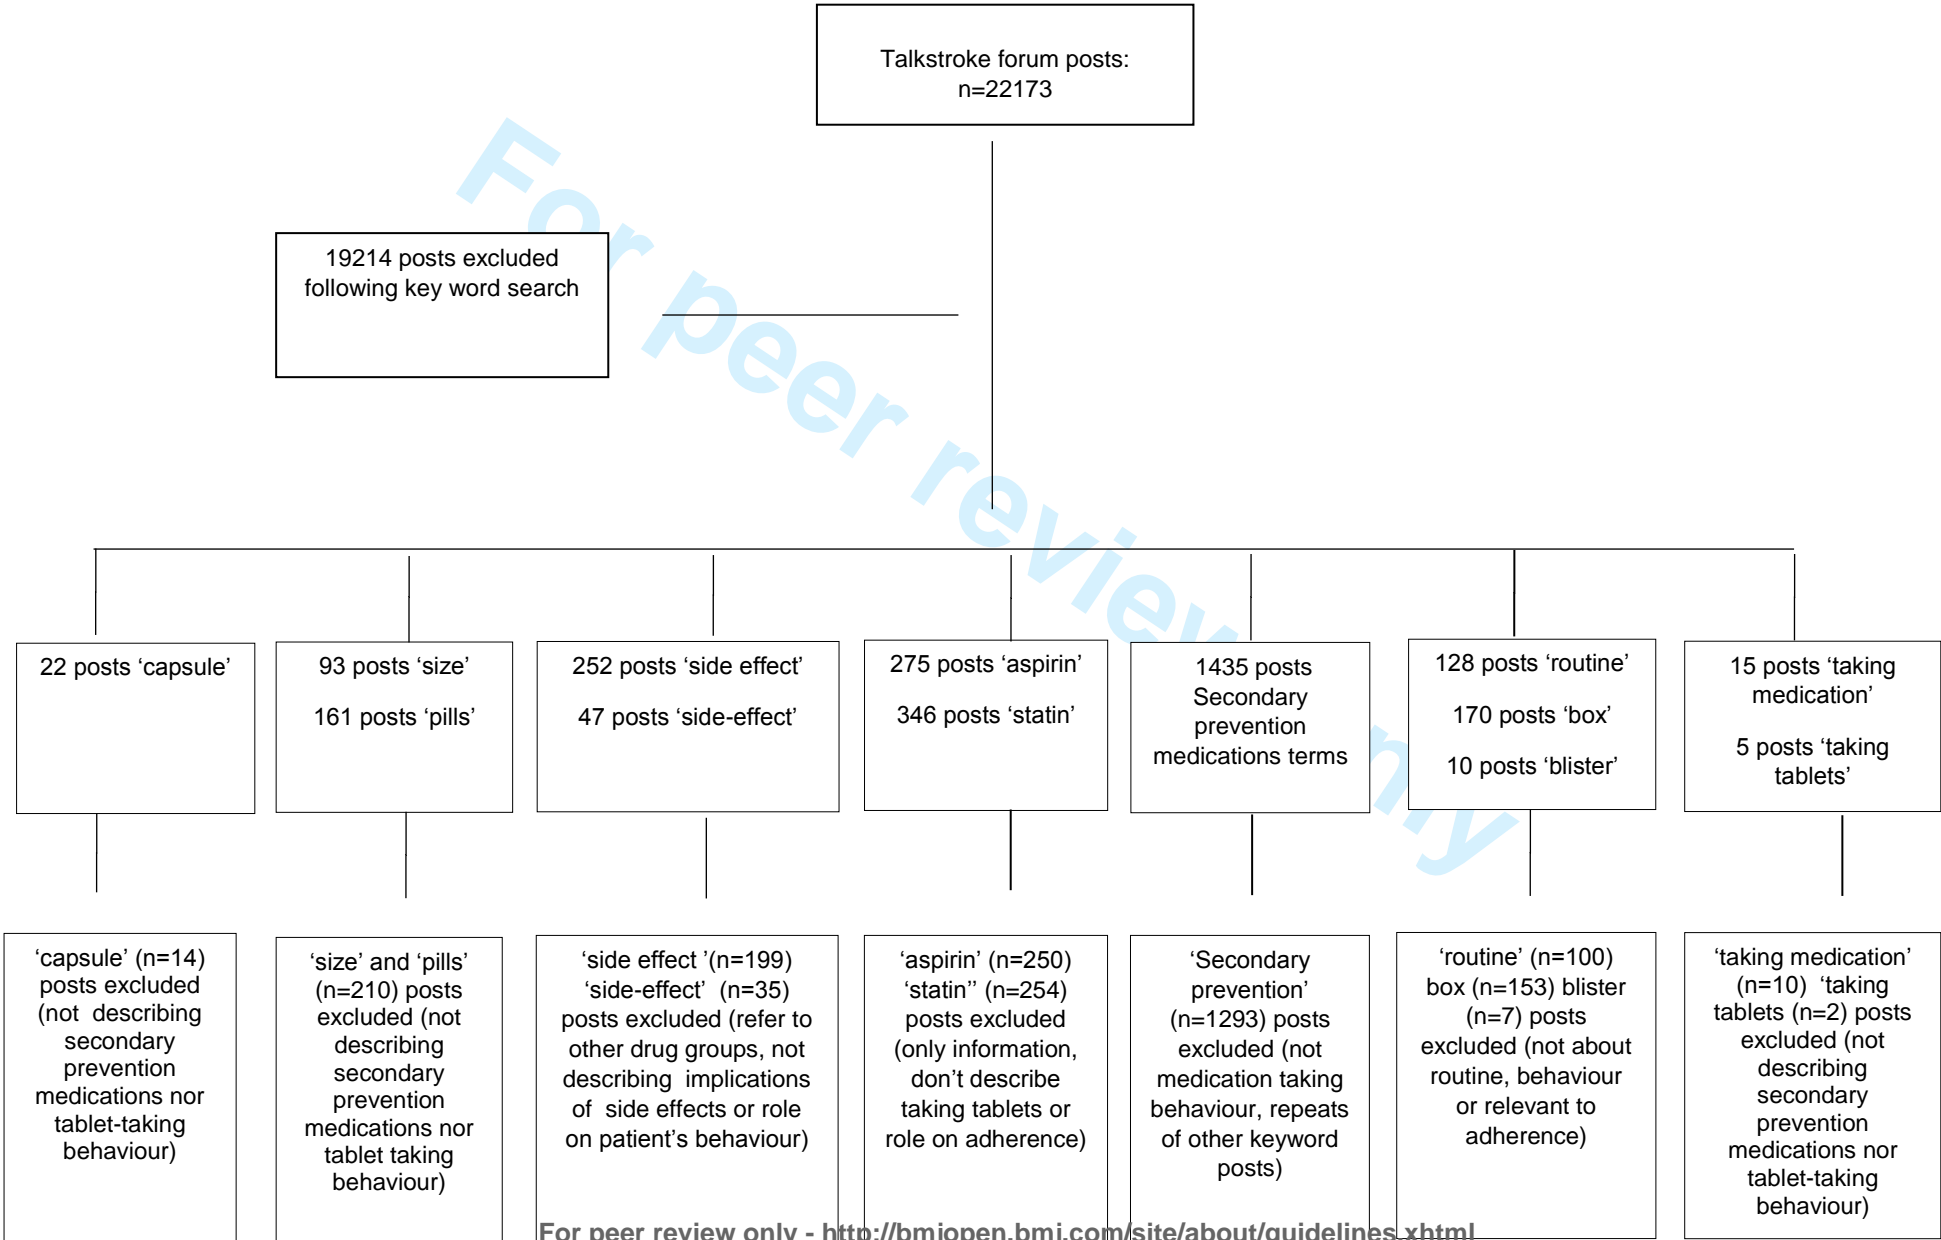

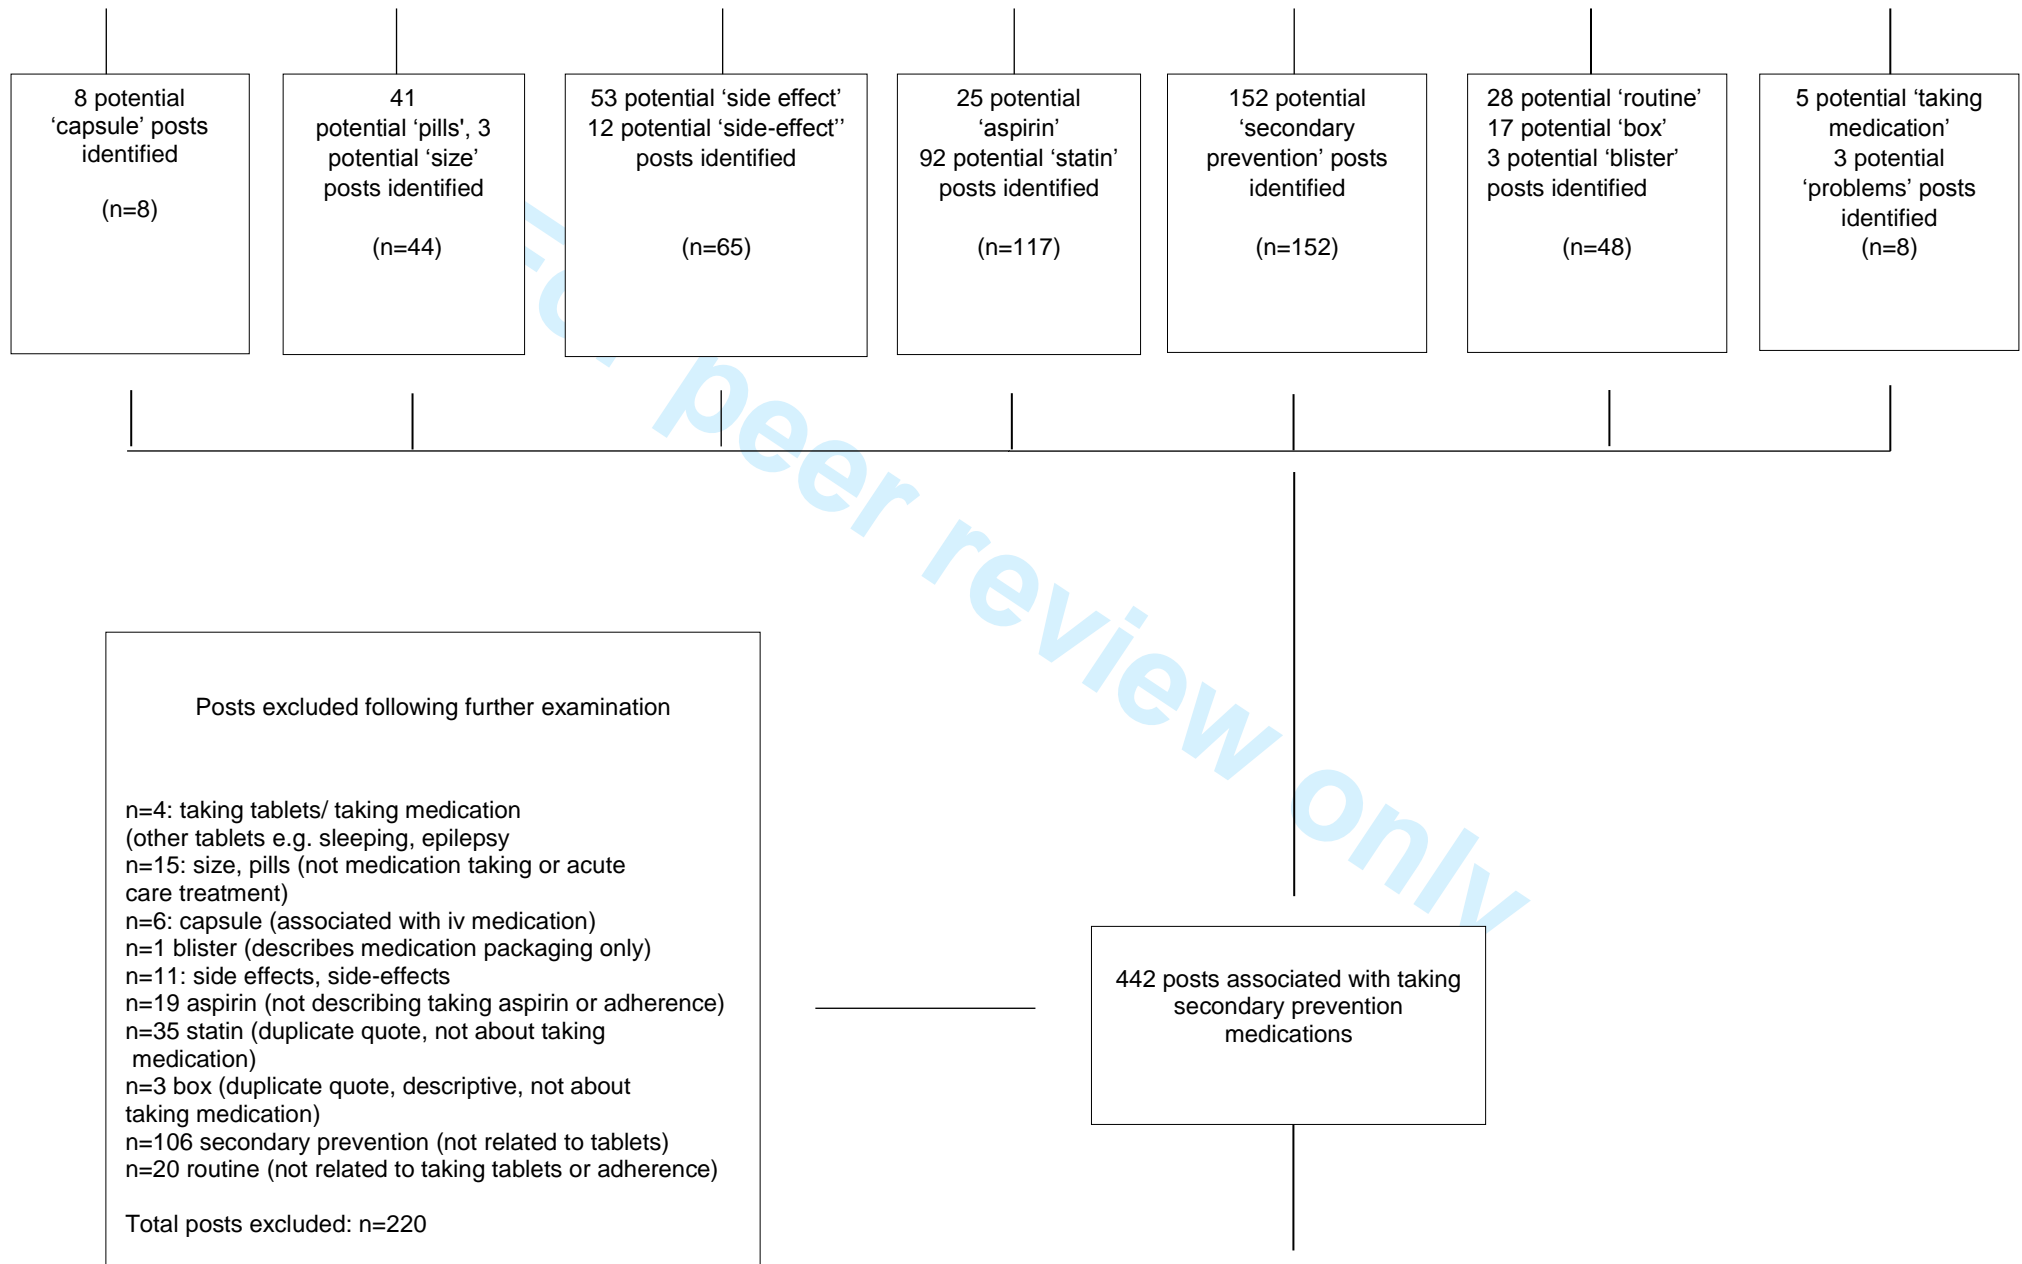



1  
2  
3  
4  
5  
6  
7  
8  
9  
10  
11  
12  
13  
14  
15  
16  
17  
18  
19  
20  
21  
22  
23  
24  
25  
26  
27  
28  
29  
30  
31  
32  
33  
34  
35  
36  
37  
38  
39  
40  
41  
42  
43  
44  
45  
46  
47

For peer review

Posts analysed: thematic analysis on themes classified as barriers or facilitators of medication adherence.

n= 4: Taking medication/ taking tablets  
n= 29: Size, pills  
n= 2: Capsule  
n= 2: Blister  
n= 54: Side effects, side-effects  
n= 14: Box  
n=109: Secondary prevention medication terms  
n= 8: routine

Total posts included: n= 222

Thematic analysis: Development of themes associated with barriers and facilitators of medication adherence

1  
2  
3  
4  
5  
6  
7  
8  
9  
10  
11  
12  
13  
14  
15  
16  
17  
18  
19  
20  
21  
22  
23  
24  
25  
26  
27  
28  
29  
30  
31  
32  
33  
34  
35  
36  
37  
38  
39  
40  
41  
42  
43  
44  
45  
46  
47

For peer review only

Consolidated criteria for reporting qualitative studies (COREQ): 32-item checklist

| No                                             | Item                                     | Guide questions/description                                                                                                                      |                                                                         |
|------------------------------------------------|------------------------------------------|--------------------------------------------------------------------------------------------------------------------------------------------------|-------------------------------------------------------------------------|
| <b>Domain 1: Research team and reflexivity</b> |                                          |                                                                                                                                                  |                                                                         |
| Personal Characteristics                       |                                          |                                                                                                                                                  |                                                                         |
| 1.                                             | Interviewer/facilitator                  | Which author/s conducted the interview or focus group?                                                                                           | N/A                                                                     |
| 2.                                             | Credentials                              | What were the researcher's credentials? <i>E.g. PhD, MD</i>                                                                                      | BSc, MSc                                                                |
| 3.                                             | Occupation                               | What was their occupation at the time of the study?                                                                                              | Research Assistant/<br>PhD Student                                      |
| 4.                                             | Gender                                   | Was the researcher male or female?                                                                                                               | Male                                                                    |
| 5.                                             | Experience and training                  | What experience or training did the researcher have?                                                                                             | JJ is a researcher with experience in undertaking qualitative research. |
| Relationship with participants                 |                                          |                                                                                                                                                  |                                                                         |
| 6.                                             | Relationship established                 | Was a relationship established prior to study commencement?                                                                                      | N/A                                                                     |
| 7.                                             | Participant knowledge of the interviewer | What did the participants know about the researcher? <i>e.g. personal goals, reasons for doing the research</i>                                  | N/A                                                                     |
| 8.                                             | Interviewer characteristics              | What characteristics were reported about the interviewer/facilitator? <i>e.g. Bias, assumptions, reasons and interests in the research topic</i> | N/A                                                                     |
| <b>Domain 2: study design</b>                  |                                          |                                                                                                                                                  |                                                                         |
| Theoretical framework                          |                                          |                                                                                                                                                  |                                                                         |
| 9.                                             | Methodological orientation and Theory    | What methodological orientation was stated to underpin the study? <i>e.g. grounded theory, discourse analysis,</i>                               | Thematic analysis:<br><b>Pg. 7</b>                                      |

| No  | Item                         | Guide questions/description                                                               |                                                                                                                    |
|-----|------------------------------|-------------------------------------------------------------------------------------------|--------------------------------------------------------------------------------------------------------------------|
|     |                              | <i>ethnography, phenomenology, content analysis</i>                                       |                                                                                                                    |
|     | Participant selection        |                                                                                           |                                                                                                                    |
| 10. | Sampling                     | How were participants selected? <i>e.g. purposive, convenience, consecutive, snowball</i> | All users of an online forum who posted comments on medication adherence were eligible for inclusion <b>Pg. 6</b>  |
| 11. | Method of approach           | How were participants approached? <i>e.g. face-to-face, telephone, mail, email</i>        | Participants were not directly approached. Information they submitted to an online forum was analysed <b>Pg. 6</b> |
| 12. | Sample size                  | How many participants were in the study?                                                  | 84 <b>Pg. 8</b>                                                                                                    |
| 13. | Non-participation            | How many people refused to participate or dropped out? Reasons?                           | N/A                                                                                                                |
|     | Setting                      |                                                                                           |                                                                                                                    |
| 14. | Setting of data collection   | Where was the data collected? <i>e.g. home, clinic, workplace</i>                         | Data was collected from an online forum electronically and remotely. <b>Pg. 6</b>                                  |
| 15. | Presence of non-participants | Was anyone else present besides the participants and researchers?                         | N/A                                                                                                                |
| 16. | Description of sample        | What are the important characteristics of the sample? <i>e.g. demographic data, date</i>  | Gender, age, stroke survivor/ caregiver, years since stroke occurred <b>Pg. 8</b>                                  |
|     | Data collection              |                                                                                           |                                                                                                                    |
| 17. | Interview guide              | Were questions, prompts, guides provided by the authors? Was it pilot tested?             | N/A                                                                                                                |
| 18. | Repeat interviews            | Were repeat interviews carried out? If yes, how many?                                     | N/A                                                                                                                |
| 19. | Audio/visual recording       | Did the research use audio or visual recording to                                         | N/A                                                                                                                |

| No                                     | Item                           | Guide questions/description                                                                                                              |                                                                                                                                          |
|----------------------------------------|--------------------------------|------------------------------------------------------------------------------------------------------------------------------------------|------------------------------------------------------------------------------------------------------------------------------------------|
|                                        |                                | collect the data?                                                                                                                        |                                                                                                                                          |
| 20.                                    | Field notes                    | Were field notes made during and/or after the interview or focus group?                                                                  | N/A                                                                                                                                      |
| 21.                                    | Duration                       | What was the duration of the interviews or focus group?                                                                                  | N/A                                                                                                                                      |
| 22.                                    | Data saturation                | Was data saturation discussed?                                                                                                           | Yes <b>Pg. 7</b>                                                                                                                         |
| 23.                                    | Transcripts returned           | Were transcripts returned to participants for comment and/or correction?                                                                 | No                                                                                                                                       |
| <b>Domain 3: analysis and findings</b> |                                |                                                                                                                                          |                                                                                                                                          |
| Data analysis                          |                                |                                                                                                                                          |                                                                                                                                          |
| 24.                                    | Number of data coders          | How many data coders coded the data?                                                                                                     | 2 authors contributed to the coding process. JJ coded all of the forum posts. 20% of posts were independently coded by ADS. <b>Pg. 7</b> |
| 25.                                    | Description of the coding tree | Did authors provide a description of the coding tree?                                                                                    | Table 2 reports all the themes that were identified and coded from the data. <b>Pg. 33</b>                                               |
| 26.                                    | Derivation of themes           | Were themes identified in advance or derived from the data?                                                                              | Themes were generated from the data <b>Pg. 9-21, 33</b>                                                                                  |
| 27.                                    | Software                       | What software, if applicable, was used to manage the data?                                                                               | Microsoft Excel, Nvivo qualitative analysis software <b>Pg. 6</b>                                                                        |
| 28.                                    | Participant checking           | Did participants provide feedback on the findings?                                                                                       | No                                                                                                                                       |
| Reporting                              |                                |                                                                                                                                          |                                                                                                                                          |
| 29.                                    | Quotations presented           | Were participant quotations presented to illustrate the themes / findings? Was each quotation identified? e.g. <i>participant number</i> | Yes, however, for ethical reasons and to protect participant confidentiality quotes were presented as descriptions, rather               |

| No  | Item                         | Guide questions/description                                            |                                                                                                                                         |
|-----|------------------------------|------------------------------------------------------------------------|-----------------------------------------------------------------------------------------------------------------------------------------|
|     |                              |                                                                        | than quotes literally extracted from the online forum. Participants were only identified by a unique number. <b>Pg. 6</b>               |
| 30. | Data and findings consistent | Was there consistency between the data presented and the findings?     | Yes<br><b>Pg. 7-21</b>                                                                                                                  |
| 31. | Clarity of major themes      | Were major themes clearly presented in the findings?                   | Yes<br><b>Pg. 7-21</b>                                                                                                                  |
| 32. | Clarity of minor themes      | Is there a description of diverse cases or discussion of minor themes? | Yes. Key themes and sub-themes are reported. Restrictions on word count prevented themes being discussed extensively<br><b>Pg. 7-21</b> |
