# Supplementary material for: Barriers and facilitators to adherence to secondary stroke prevention medications after stroke: analysis of survivors and caregivers views from an online stroke forum
Source: PubMed Central journal article supplement (PMC5541606; doi:10.1136/bmjopen-2017-016814), 2017-07-16
Supplement: bmjopen-2017-016814supp001.pdf [file bmjopen-2017-016814supp001.pdf]

Supplementary File 1. Analysis strategy to identify study posts

Talkstroke forum posts:  
n=22173

19214 posts excluded  
following key word search

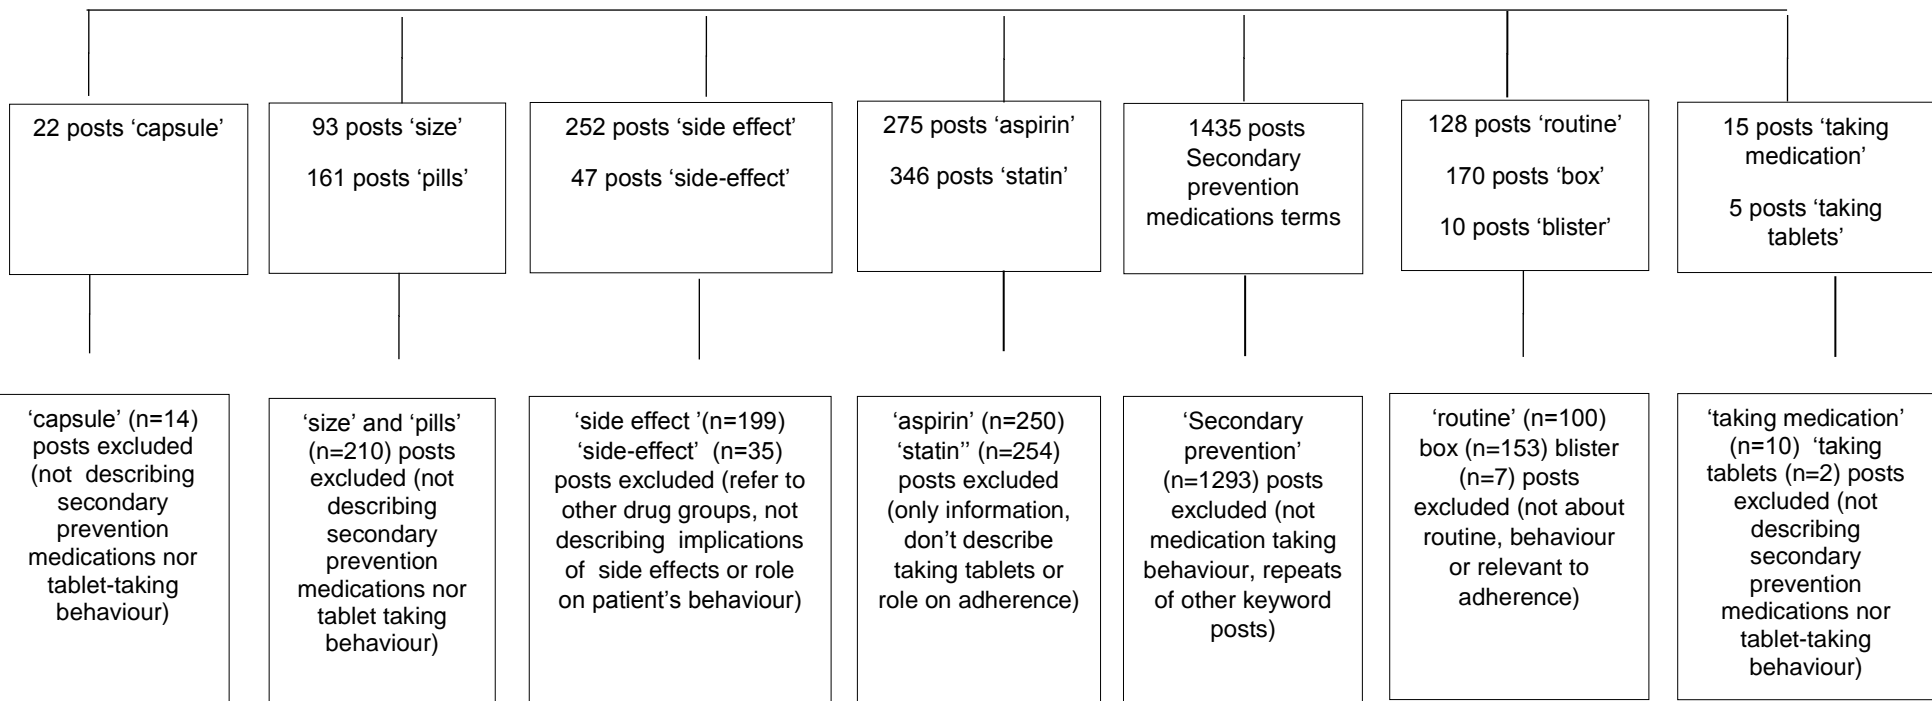

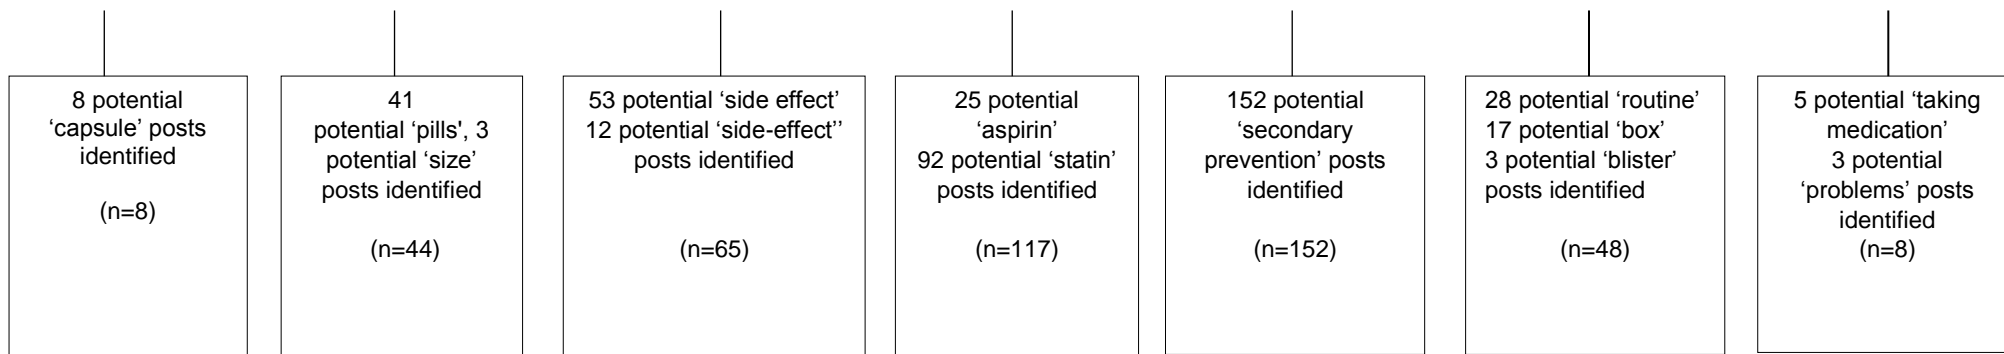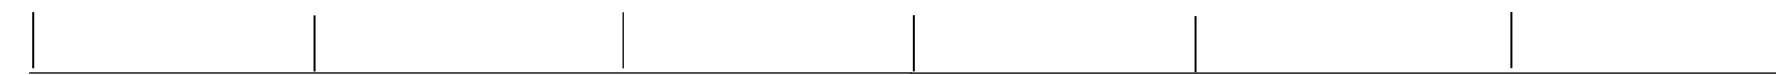

Posts excluded following further examination

- n=4: taking tablets/ taking medication (other tablets e.g. sleeping, epilepsy)
- n=15: size, pills (not medication taking or acute care treatment)
- n=6: capsule (associated with iv medication)
- n=1 blister (describes medication packaging only)
- n=11: side effects, side-effects
- n=19 aspirin (not describing taking aspirin or adherence)
- n=35 statin (duplicate quote, not about taking medication)
- n=3 box (duplicate quote, descriptive, not about taking medication)
- n=106 secondary prevention (not related to tablets)
- n=20 routine (not related to taking tablets or adherence)

Total posts excluded: n=220

442 posts associated with taking secondary prevention medications

Posts analysed: thematic analysis on themes classified as barriers or facilitators of medication adherence.

n= 4: Taking medication/ taking tablets

n= 29: Size, pills

n= 2: Capsule

n= 2: Blister

n= 54: Side effects, side-effects

n= 14: Box

n=109: Secondary prevention medication terms

n= 8: routine

Total posts included: n= 222

Thematic analysis: Development of themes associated with barriers and facilitators of medication adherence
